# Supplementary material for: Replacement of nitro function by free boronic acid in non-steroidal anti-androgens
Source: Royal Society of Chemistry journal article supplement (doi:10.1039/d4md00343h), 2024-01-01

## Replacement of nitro function by free boronic acid in the group of non-steroidal anti-androgens.

Petr Šlechta<sup>1</sup>, Roman Viták<sup>2</sup>, Pavel Bárta<sup>3</sup>, Kateřina Koucká<sup>1</sup>, Monika Berková<sup>1</sup>, Diana Žďárová<sup>1</sup>, Andrea Petříková<sup>1</sup>, Jiří Kuneš<sup>4</sup>, Vladimír Kubíček<sup>3</sup>, Martin Doležal<sup>1</sup>, Radek Kučera<sup>2</sup>, and Marta Kučerová-Chlupáčová<sup>1\*</sup>

<sup>1</sup> Department of Pharmaceutical Chemistry and Pharmaceutical Analysis, Faculty of Pharmacy in Hradec Králové, Charles University, Ak. Heyrovského 1203/8, 50003 Hradec Králové, Czech Republic

<sup>2</sup> Department of Pharmacology and Toxicology, Faculty of Medicine in Pilsen, Charles University, alej Svobody 1655/76, 32300 Plzeň, Czech Republic

<sup>3</sup> Department of Biophysics and Physical Chemistry, Faculty of Pharmacy in Hradec Králové, Charles University, Ak. Heyrovského 1203/8, 50003 Hradec Králové, Czech Republic

<sup>4</sup> Department of Organic and Bioorganic Chemistry, Faculty of Pharmacy in Hradec Králové, Charles University, Ak. Heyrovského 1203/8, 50003 Hradec Králové, Czech Republic

\*Email: kucerom@faf.cuni.cz

## Supporting information

Table of contents

|                                                                |           |
|----------------------------------------------------------------|-----------|
| <b>Results of <i>in vitro</i> cytotoxicity screening</b> ..... | <b>S1</b> |
| Table S1.....                                                  | S1        |
| Table S2.....                                                  | S4        |
| Table S3.....                                                  | S5        |
| Table S4.....                                                  | S5        |
| <b>NMR spectra of final compounds</b> .....                    | <b>S6</b> |

Results of *in vitro* cytotoxicity screening

Table S1: Complete results of *in vitro* cytotoxicity screening for aromatic amides against the tested cell lines with indicated incubation time and calculated selectivity index (SI).

| Structure                                                                           | Code      | IC <sub>50</sub> (μM) |            |            |             |              |                 |
|-------------------------------------------------------------------------------------|-----------|-----------------------|------------|------------|-------------|--------------|-----------------|
|                                                                                     |           | HepG2 (24 h)          | PC3 (24 h) | PC3 (72 h) | HK-2 (72 h) | LAPC4 (72 h) | SI (HK-2/LAPC4) |
| 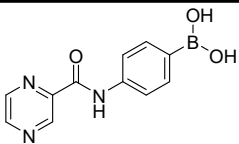 | <b>1a</b> | >250                  | >100       | na         | na          | >100         | na              |
|  | <b>2a</b> | >100                  | >100       | na         | na          | >100         | na              |
|  | <b>3a</b> | >500                  | >1000      | na         | na          | >100         | na              |

|                                                                                     |            |       |       |       |       |      |     |
|-------------------------------------------------------------------------------------|------------|-------|-------|-------|-------|------|-----|
| 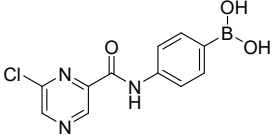   | <b>4a</b>  | >500  | >250  | na    | na    | >100 | na  |
|    | <b>5a</b>  | 139.3 | 133.4 | 121.6 | 194.5 | 27.8 | 7.0 |
|    | <b>6a</b>  | >250  | >250  | na    | na    | >100 | na  |
|    | <b>7a</b>  | >500  | >500  | na    | na    | >100 | na  |
|    | <b>8a</b>  | 126.4 | 193.3 | 375.2 | 422.4 | 78.3 | 5.4 |
|   | <b>9a</b>  | 71.26 | 118.4 | 78.1  | 137.7 | 19.2 | 7.2 |
|  | <b>10a</b> | 187   | >1000 | 227.9 | 183.7 | 48.0 | 3.8 |
|  | <b>11a</b> | >1000 | 296   | 779.6 | 1000  | >100 | na  |
|  | <b>12a</b> | >1000 | na    | na    | na    | >100 | na  |
|  | <b>13a</b> | >250  | >250  | na    | na    | >100 | na  |
|  | <b>14a</b> | >100  | >100  | na    | na    | >100 | na  |
|  | <b>15a</b> | >25   | >50   | na    | na    | >100 | na  |

|                                                                                   |            |       |      |    |    |      |    |
|-----------------------------------------------------------------------------------|------------|-------|------|----|----|------|----|
| 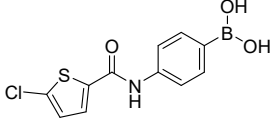 | <b>16a</b> | >50   | >50  | na | na | >100 | na |
|  | <b>17a</b> | >25   | >100 | na | na | >100 | na |
|  | <b>18a</b> | >50   | >50  | na | na | >100 | na |
|  | <b>19a</b> | >50   | >50  | na | na | >100 | na |
|  | <b>20a</b> | 322.2 | >250 | na | na | >100 | na |

NOTE: na= not available.

Table S2: Complete results of in vitro cytotoxicity screening for aliphatic and alicyclic amides against the tested cell lines with indicated incubation time and calculated selectivity index (SI).

| Structure                                                                           | Code      | IC <sub>50</sub> (μM) |            |            |             |              | SI (HK-2/LAPC4) |
|-------------------------------------------------------------------------------------|-----------|-----------------------|------------|------------|-------------|--------------|-----------------|
|                                                                                     |           | HepG2 (24 h)          | PC3 (24 h) | PC3 (72 h) | HK-2 (72 h) | LAPC4 (72 h) |                 |
| 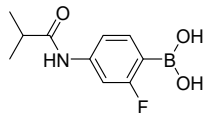   | <b>1b</b> | >1000                 | >1000      | na         | na          | >100         | na              |
|    | <b>2b</b> | >1000                 | >1000      | na         | na          | >100         | na              |
|    | <b>3b</b> | >1000                 | 877.7      | na         | na          | >100         | na              |
|    | <b>4b</b> | >250                  | >250       | na         | na          | >100         | na              |
|   | <b>5b</b> | >250                  | >250       | na         | na          | >100         | na              |
|  | <b>6b</b> | >1000                 | >1000      | na         | na          | >100         | na              |
|  | <b>7b</b> | >500                  | >1000      | na         | na          | >100         | na              |

NOTE: na= not available.

Table S3: Complete results of in vitro cytotoxicity screening for aliphatic and alicyclic amides substituted with trifluoromethyl group against the tested cell lines with indicated incubation time and calculated selectivity index (SI).

| Structure                                                                           | Code       | IC <sub>50</sub> (μM) |           |           |            |             |                 |
|-------------------------------------------------------------------------------------|------------|-----------------------|-----------|-----------|------------|-------------|-----------------|
|                                                                                     |            | HepG2 (24h)           | PC3 (24h) | PC3 (72h) | HK-2 (72h) | LAPC4 (72h) | SI (HK-2/LAPC4) |
| 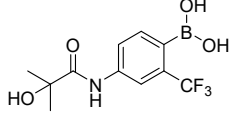   | <b>HFB</b> | >1000                 | >1000     | >1000     | >1000      | 403.8       | na              |
|    | <b>1c</b>  | >1000                 | >1000     | 697.1     | >1000      | >100        | na              |
|    | <b>2c</b>  | >1000                 | >1000     | na        | na         | >100        | na              |
|    | <b>3c</b>  | >1000                 | >500      | na        | na         | >100        | na              |
|   | <b>4c</b>  | >1000                 | >1000     | na        | na         | >100        | na              |
|  | <b>5c</b>  | >1000                 | >1000     | 185.6     | >1000      | >100        | na              |

NOTE: na= not available.

Table S4: Results of in vitro cytotoxicity screening for standards against the tested cell lines with indicated incubation time and calculated selectivity index (SI).

| Structure                                                                           | Code                                  | IC <sub>50</sub> (μM) |            |            |             |              |                 |
|-------------------------------------------------------------------------------------|---------------------------------------|-----------------------|------------|------------|-------------|--------------|-----------------|
|                                                                                     |                                       | HepG2 (24 h)          | PC3 (24 h) | PC3 (72 h) | HK-2 (72 h) | LAPC4 (72 h) | SI (HK-2/LAPC4) |
| 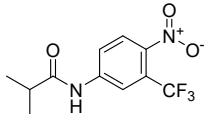 | <b>flutamide</b>                      | 137.2                 | 34.7       | 50.8       | 76.2        | 60.5         | 1.3             |
|  | <b>HF</b>                             | 103.2                 | 229.2      | 41.8       | 231.0       | 136.1        | 1.7             |
|  | <b>bicalutamide (racemic mixture)</b> | na                    | na         | na         | na          | 37.2         | na              |

NOTE: na= not available.

# NMR spectra of final compounds

## HFB <sup>1</sup>H NMR spectrum

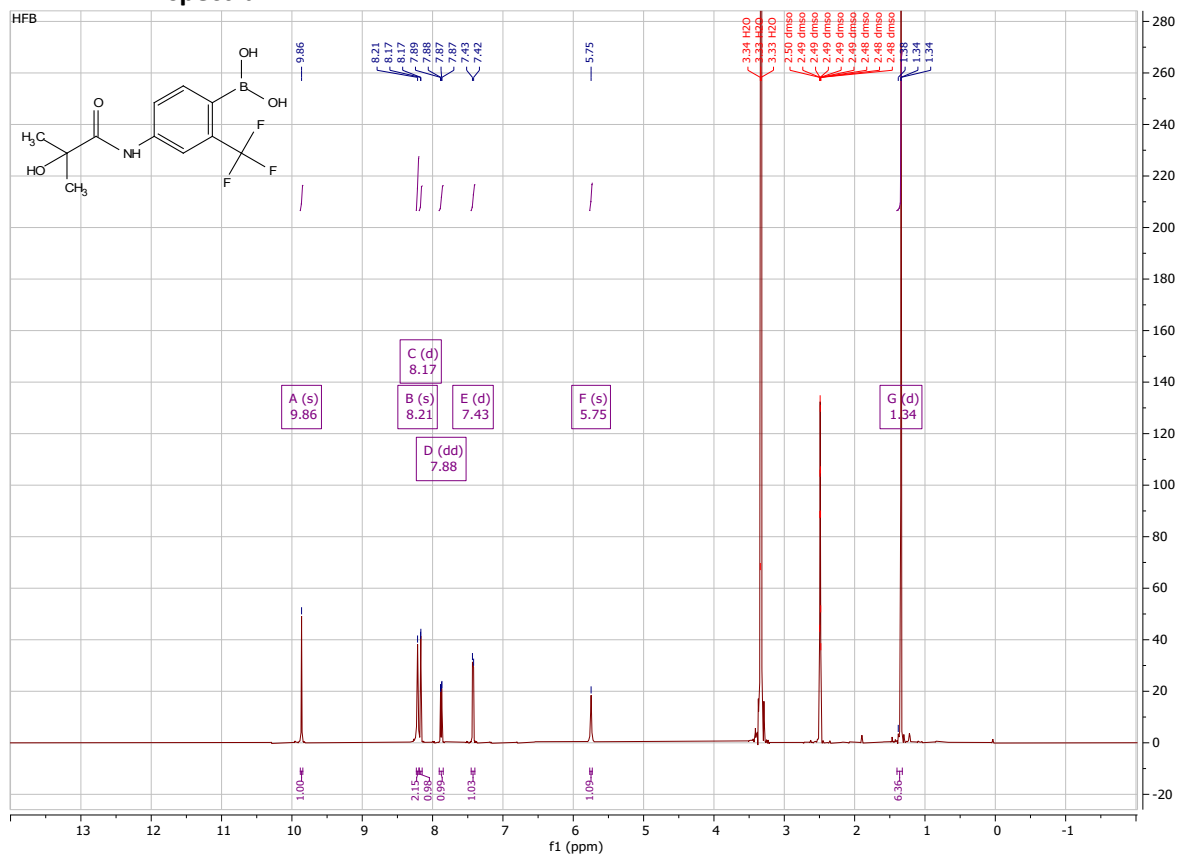

## HFB <sup>13</sup>C NMR spectrum

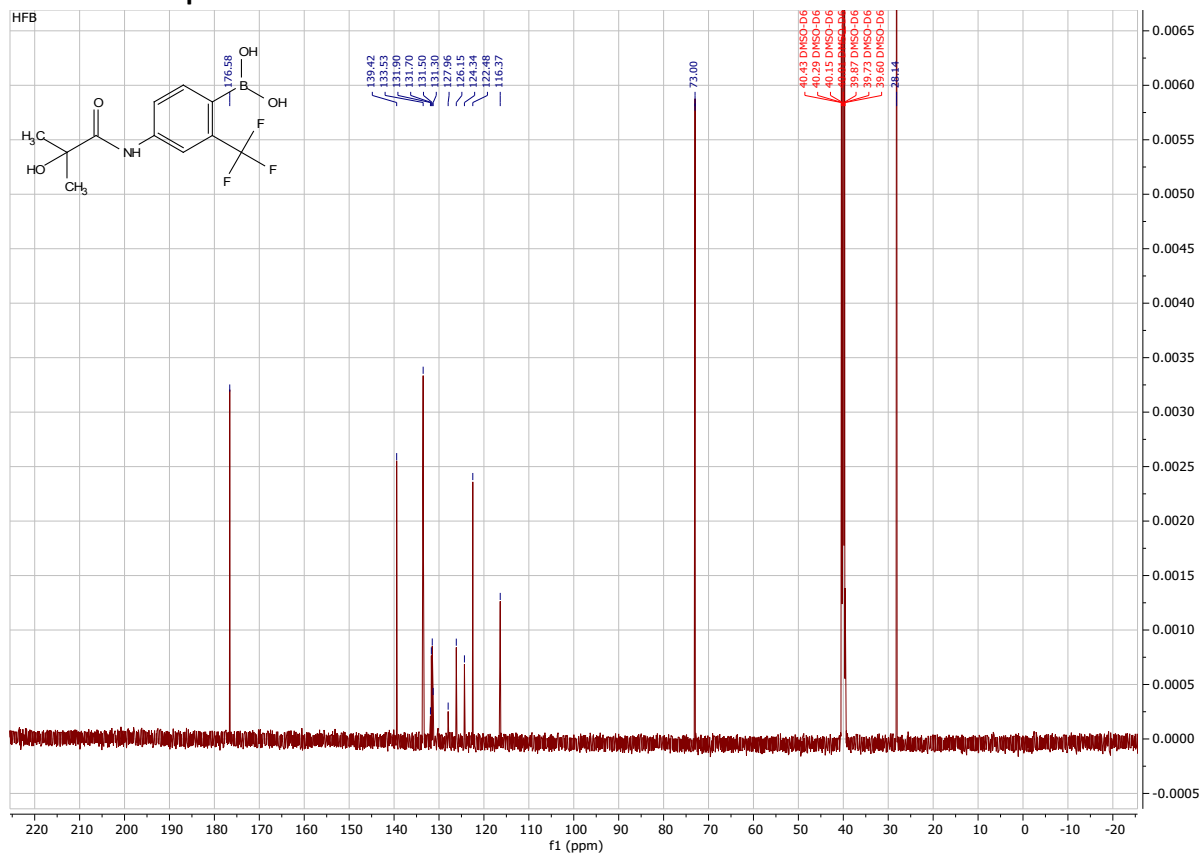

### HFB <sup>11</sup>B NMR spectrum

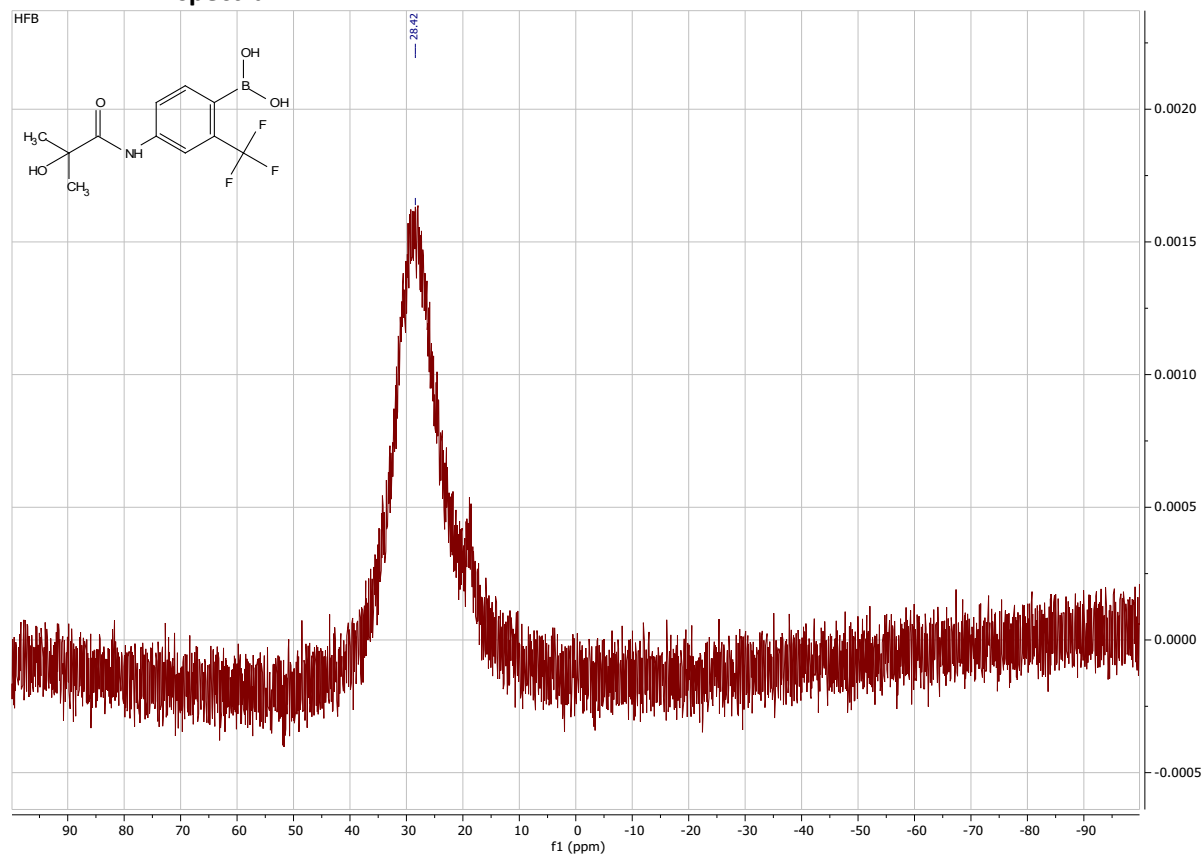

### 1a <sup>1</sup>H NMR spectrum

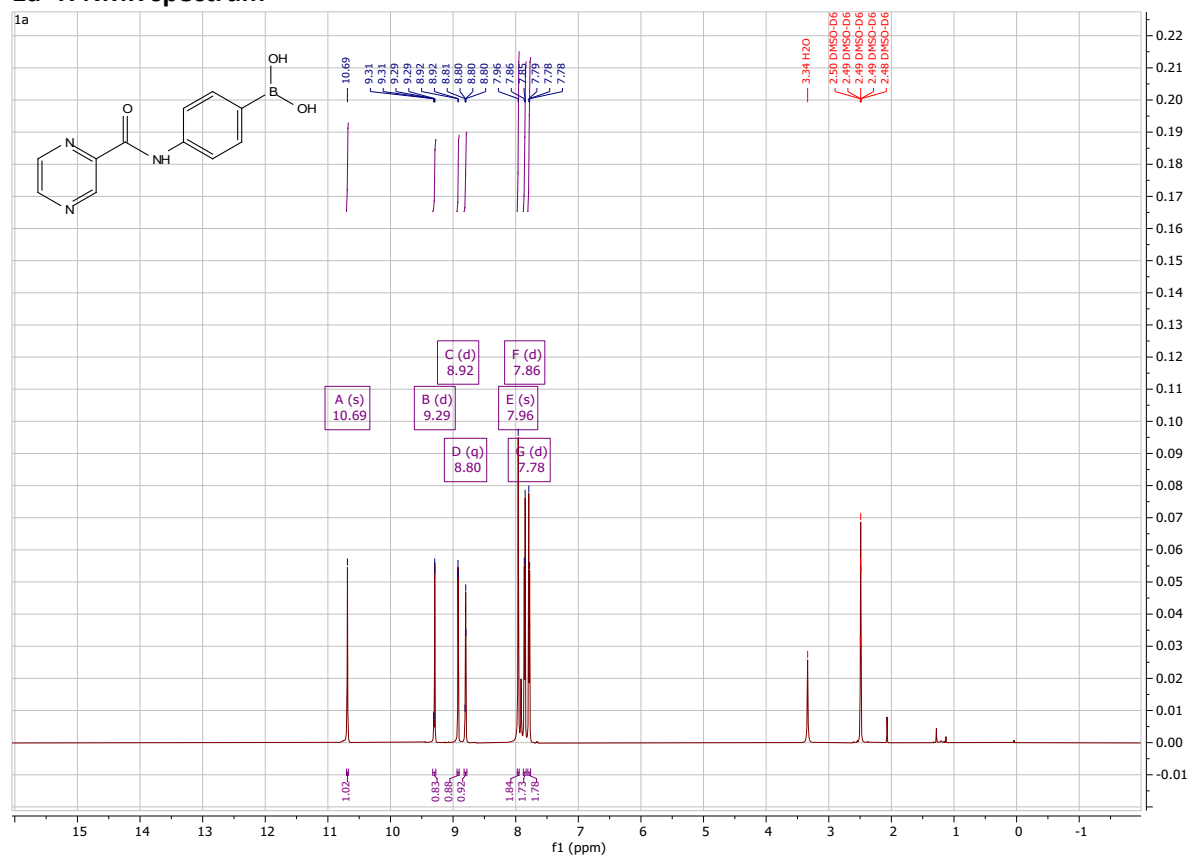

### 1a <sup>13</sup>C NMR spectrum

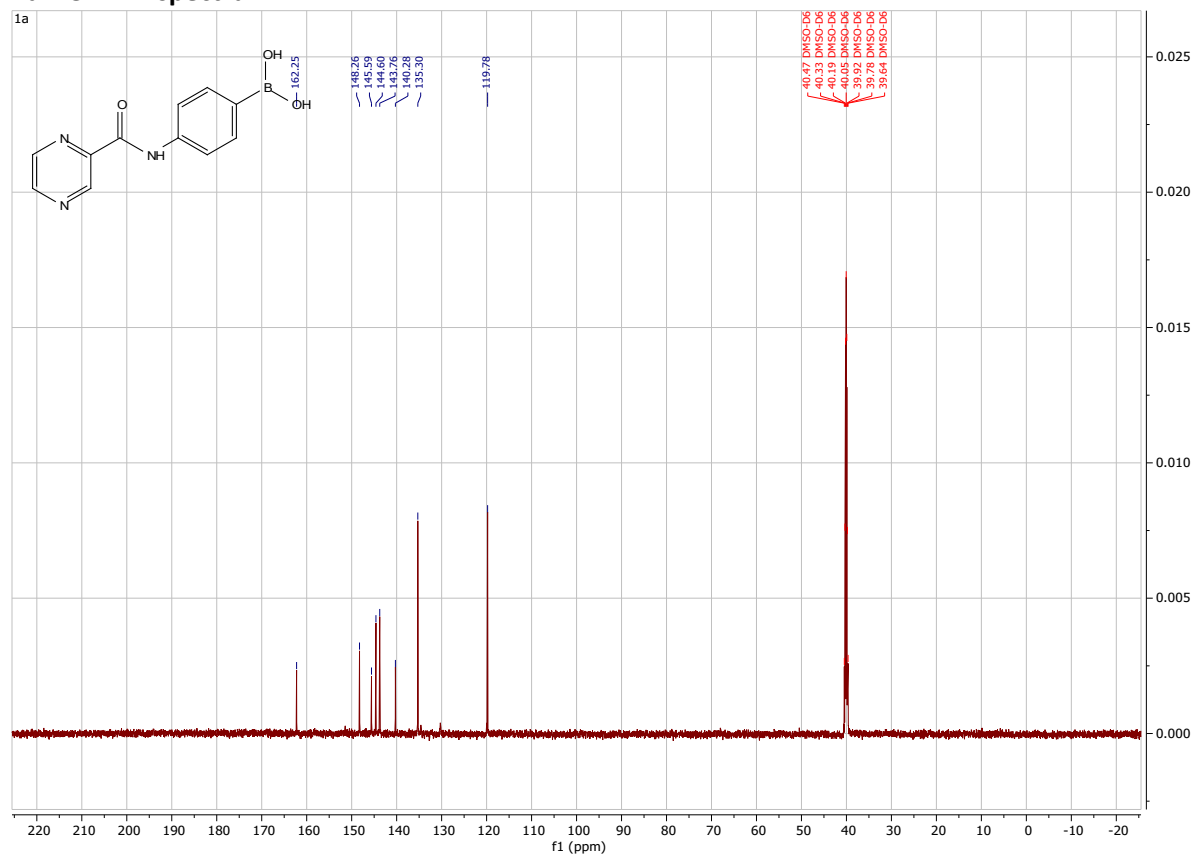

### 1a <sup>11</sup>B NMR spectrum

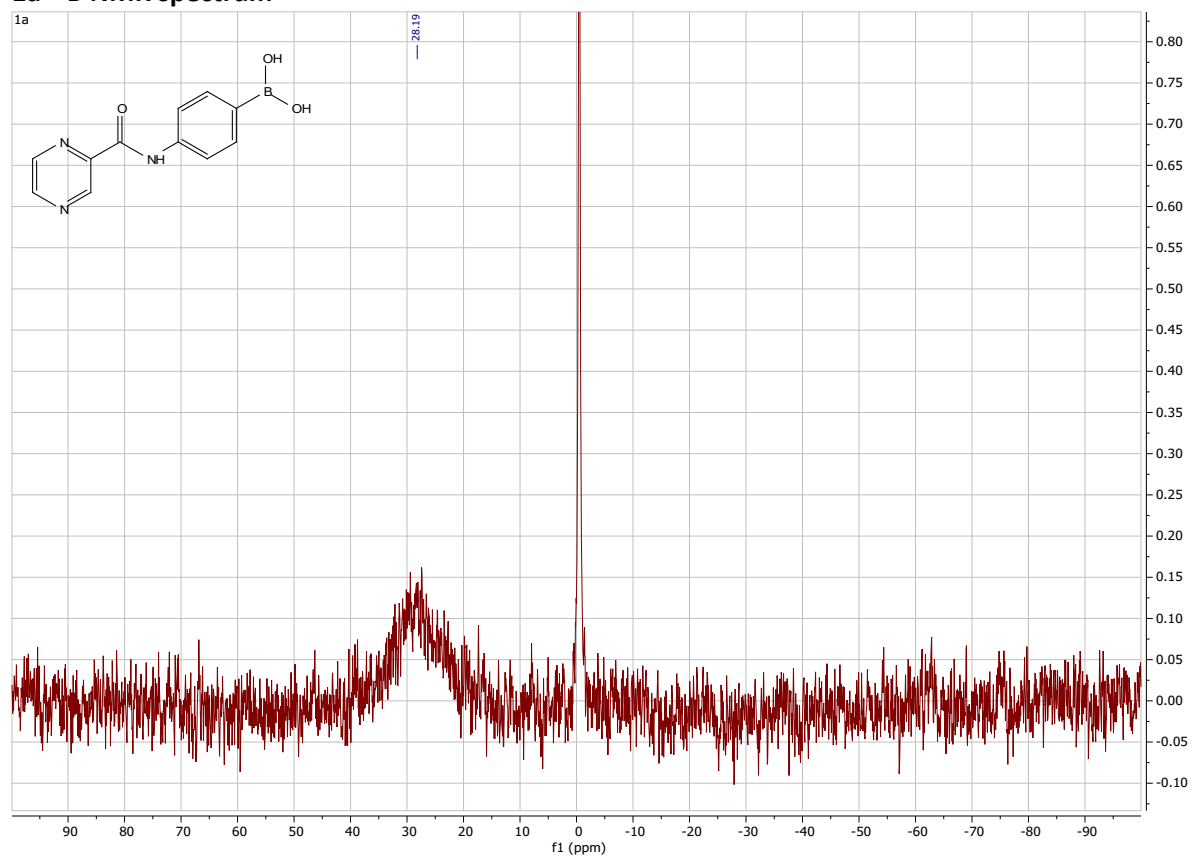



## 2a <sup>1</sup>H NMR spectrum

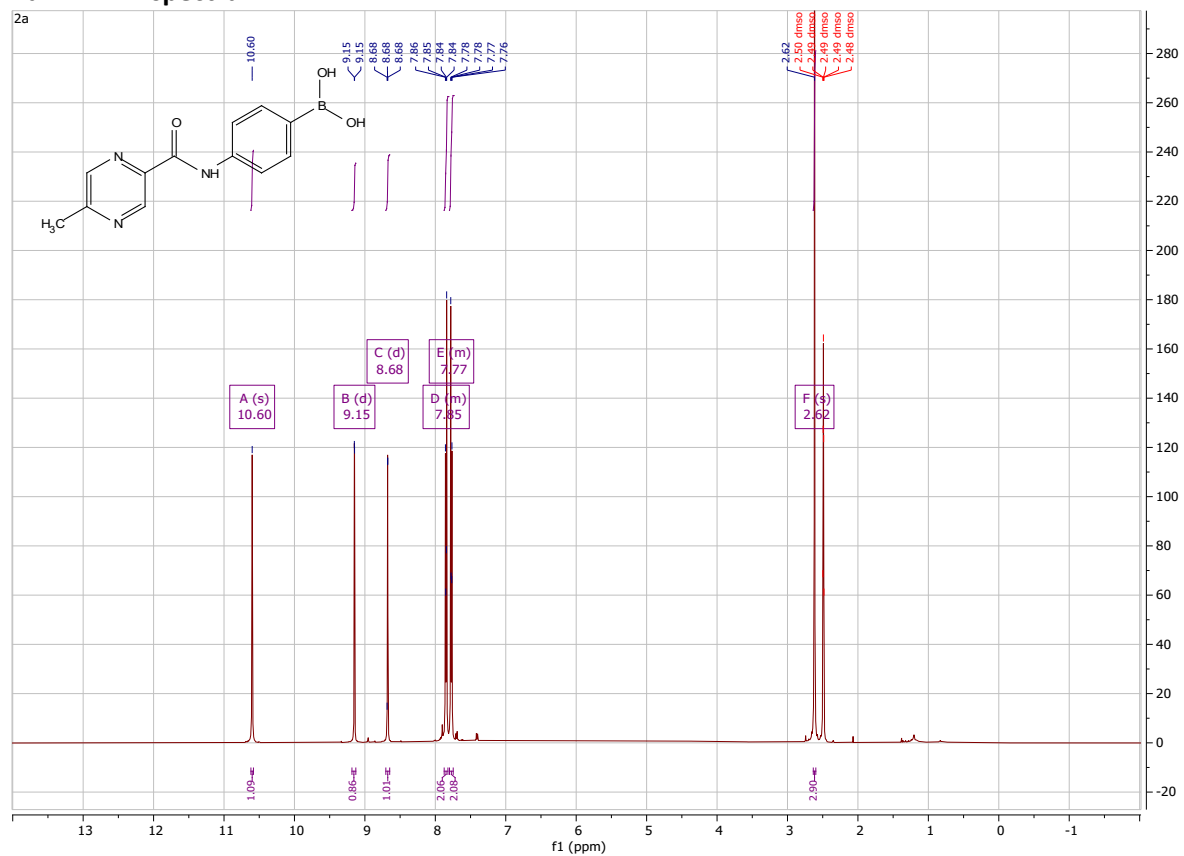

## 2a <sup>13</sup>C NMR spectrum

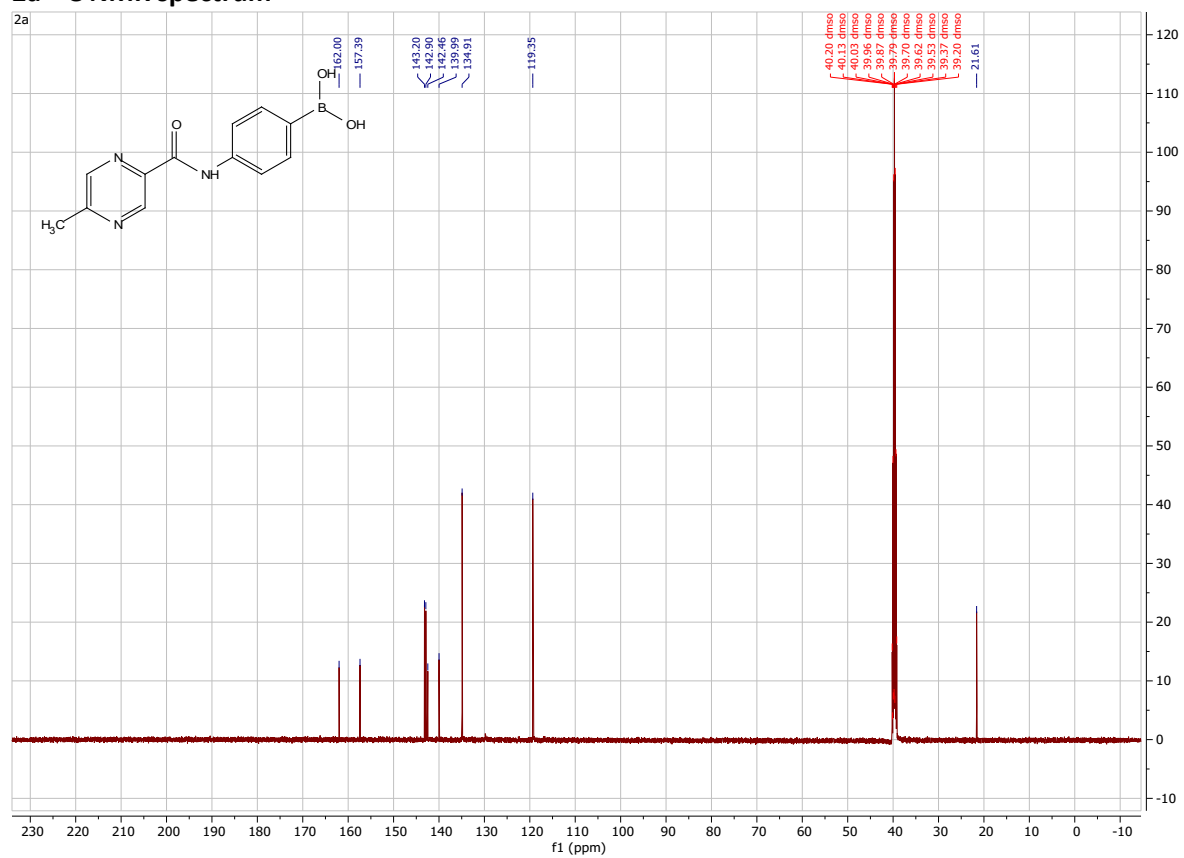

### 2a <sup>11</sup>B NMR spectrum

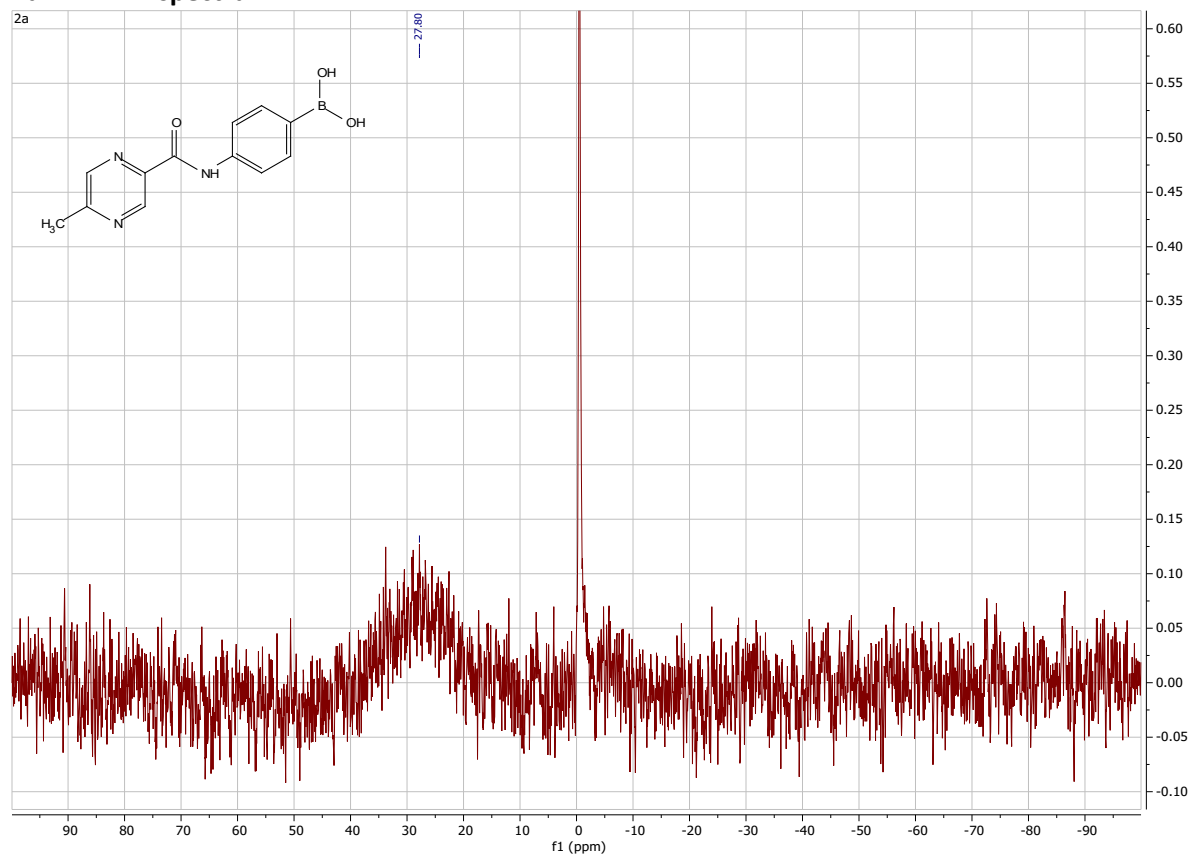

### 3a <sup>1</sup>H NMR spectrum

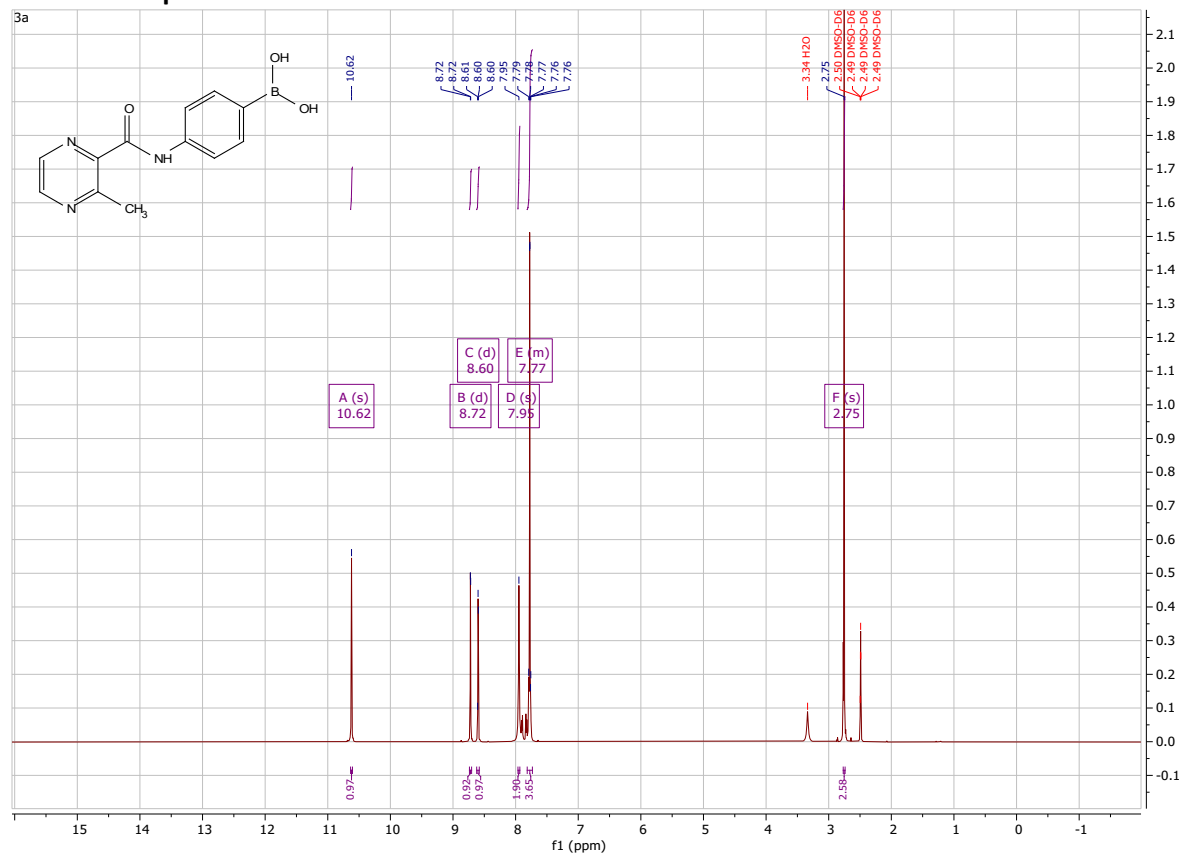

### 3a <sup>13</sup>C NMR spectrum

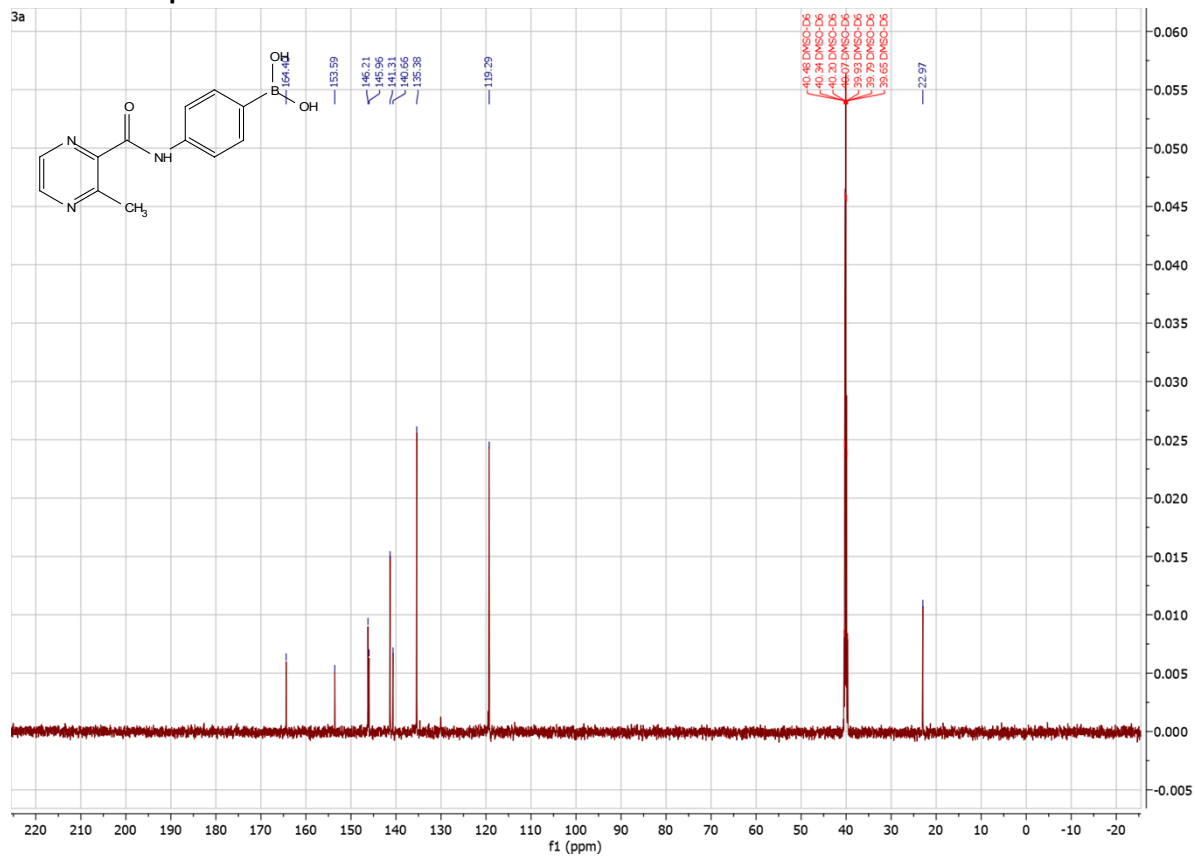

### 3a <sup>11</sup>B NMR spectrum

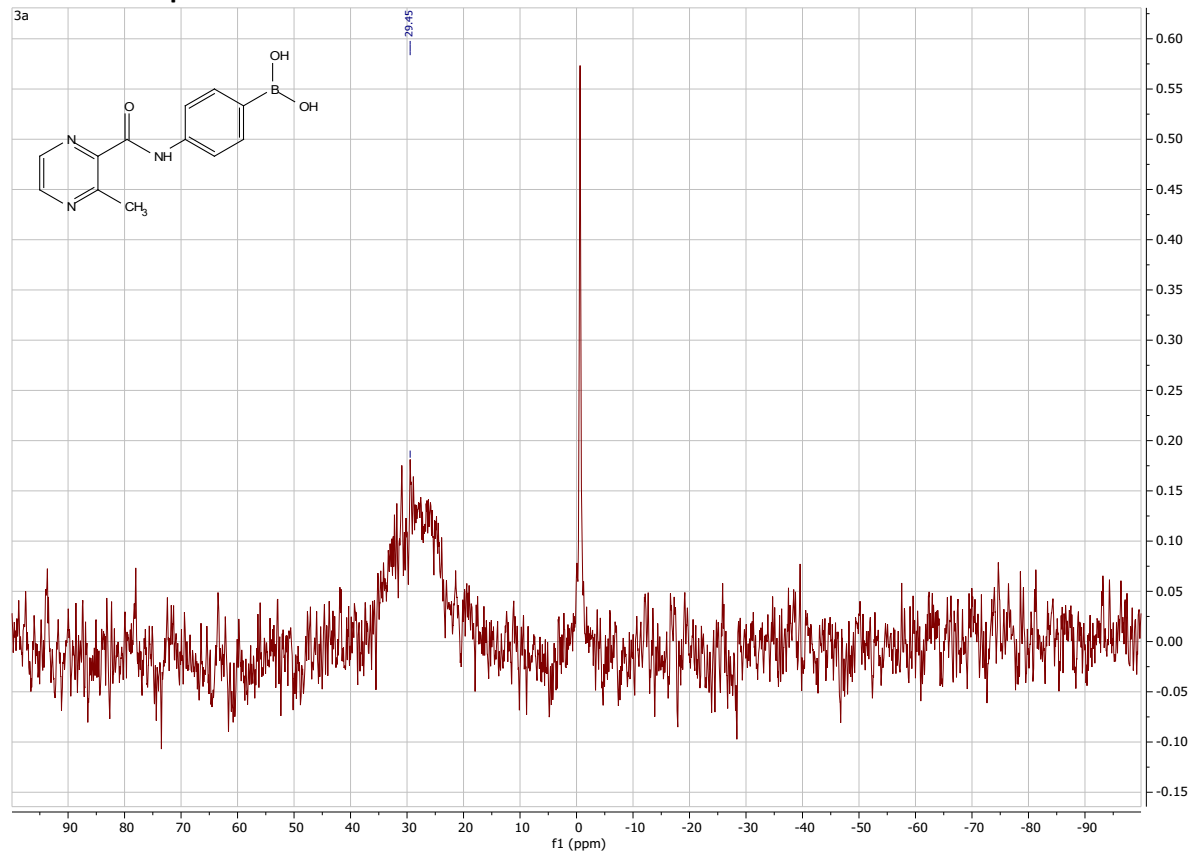

### 4a <sup>1</sup>H NMR spectrum

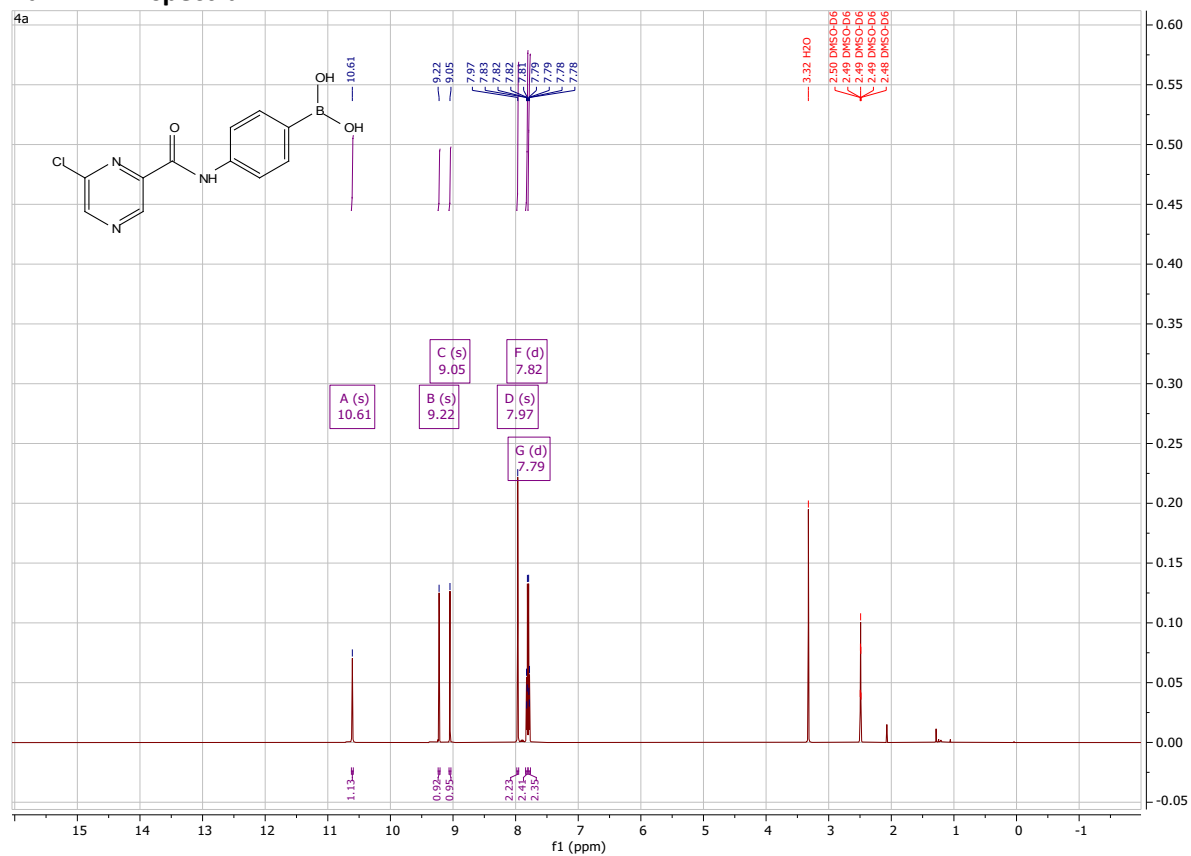

### 4a <sup>13</sup>C NMR spectrum

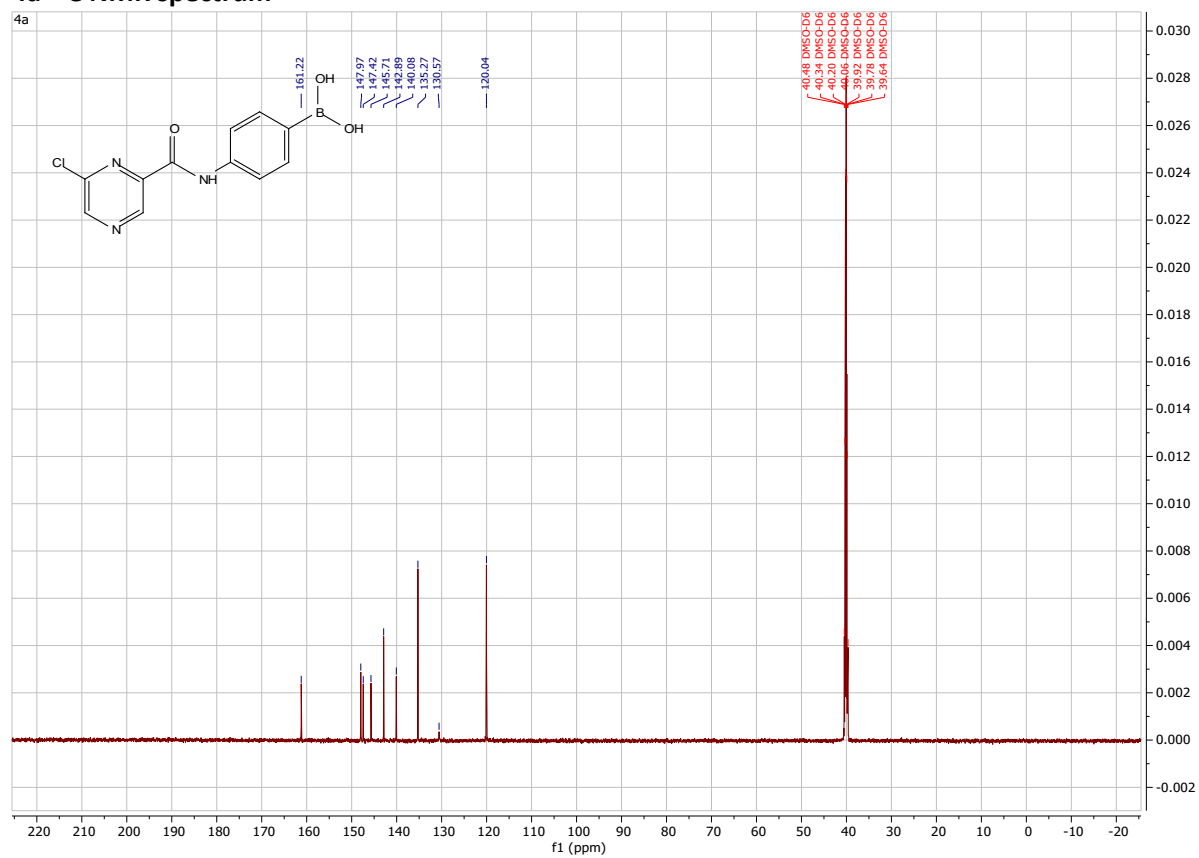

### 4a <sup>11</sup>B NMR spectrum

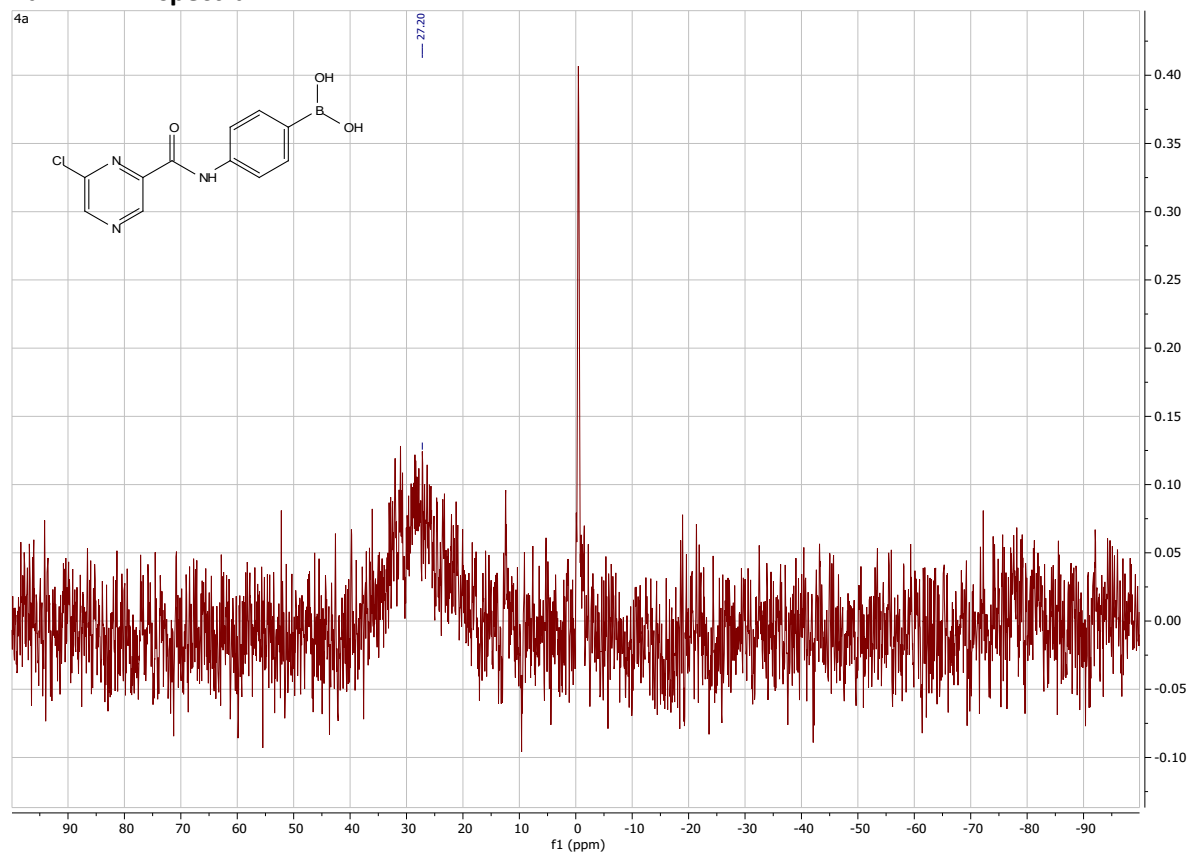

### 5a <sup>1</sup>H NMR spectrum

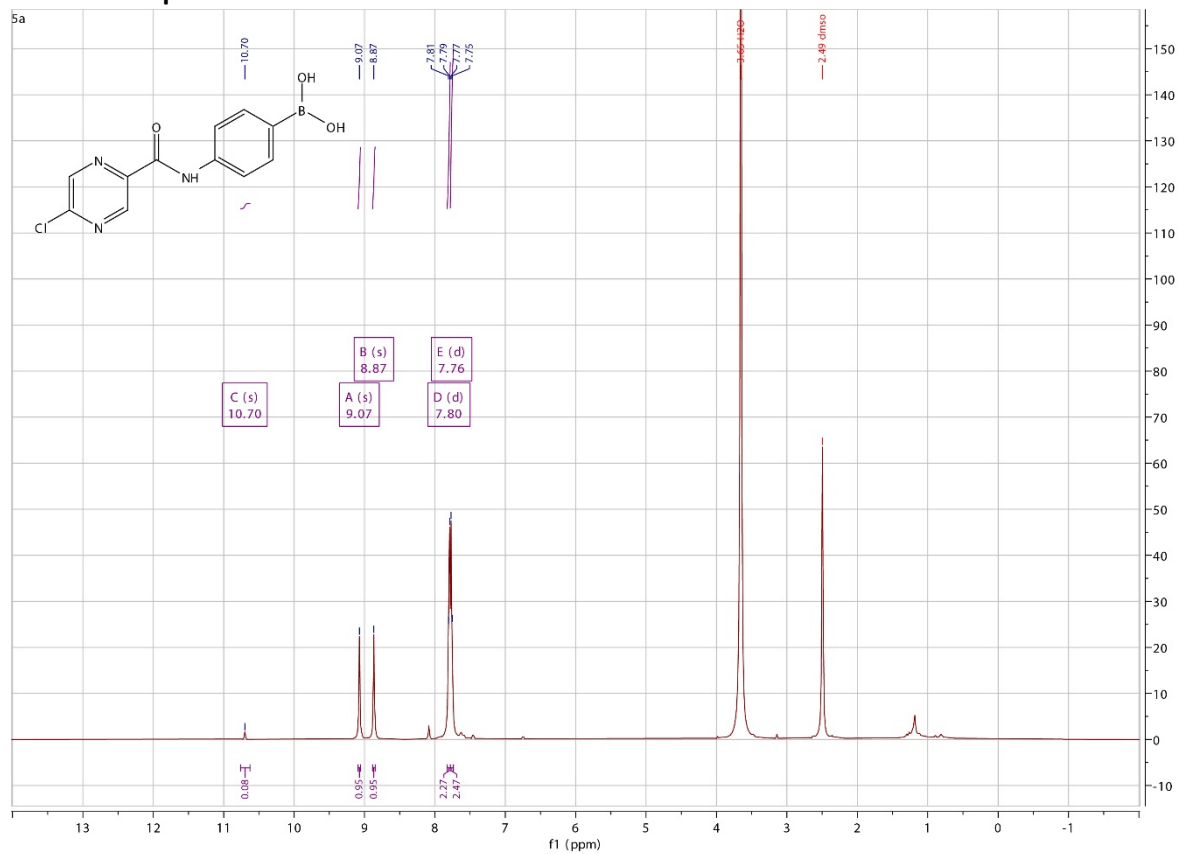

### 5a <sup>13</sup>C NMR spectrum

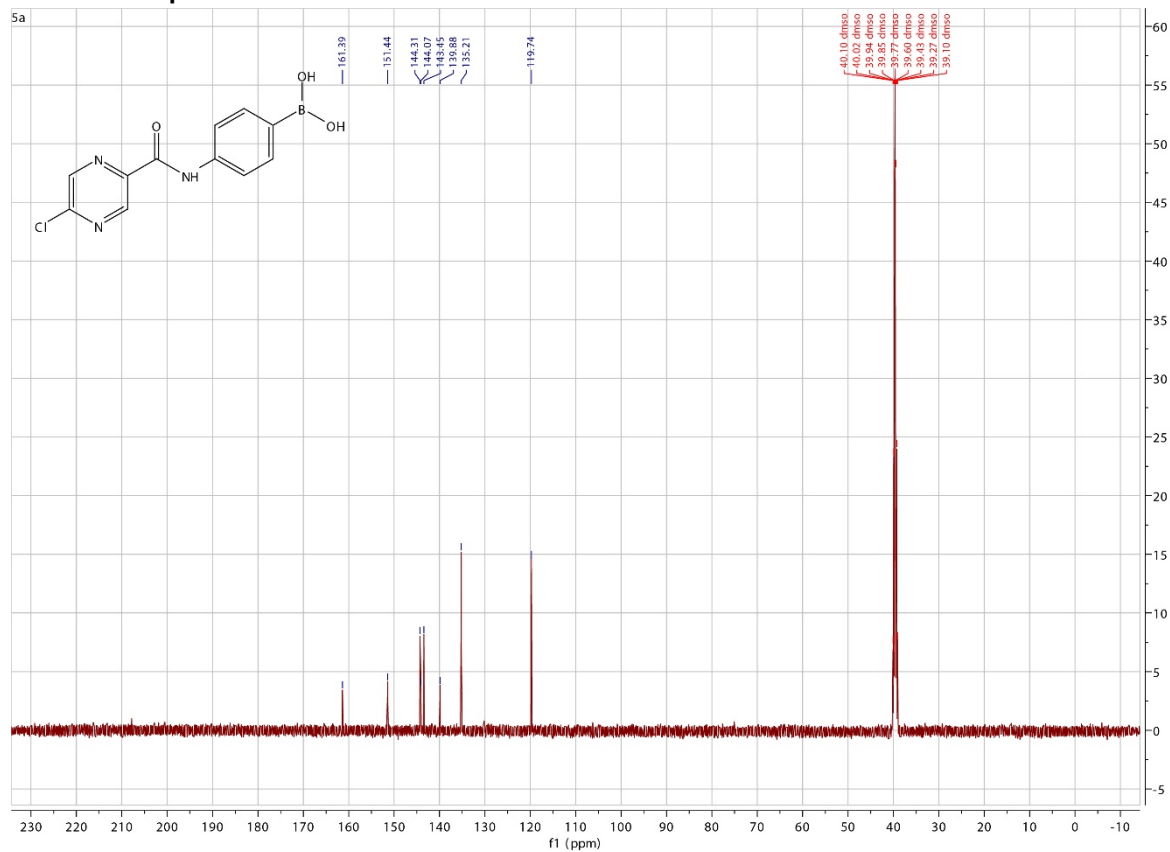

### 5a <sup>11</sup>B NMR spectrum

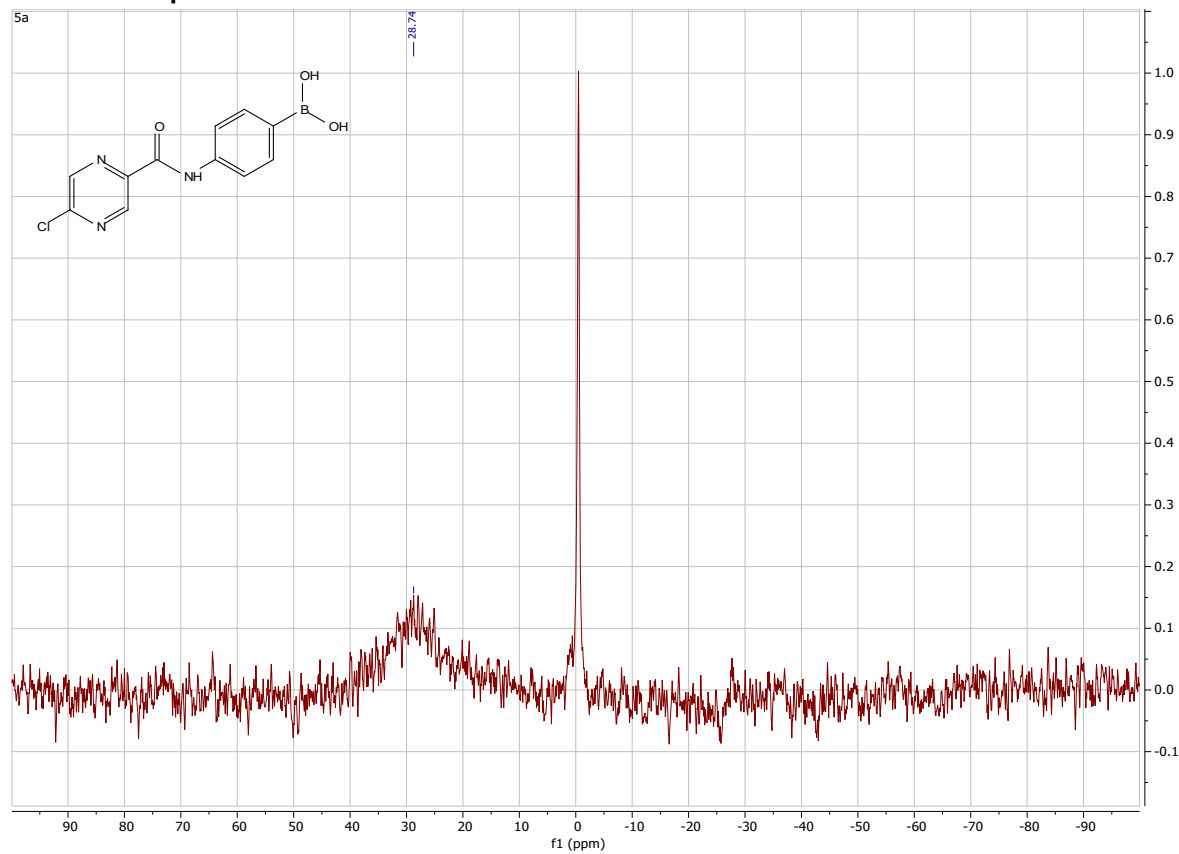

### 6a <sup>1</sup>H NMR spectrum

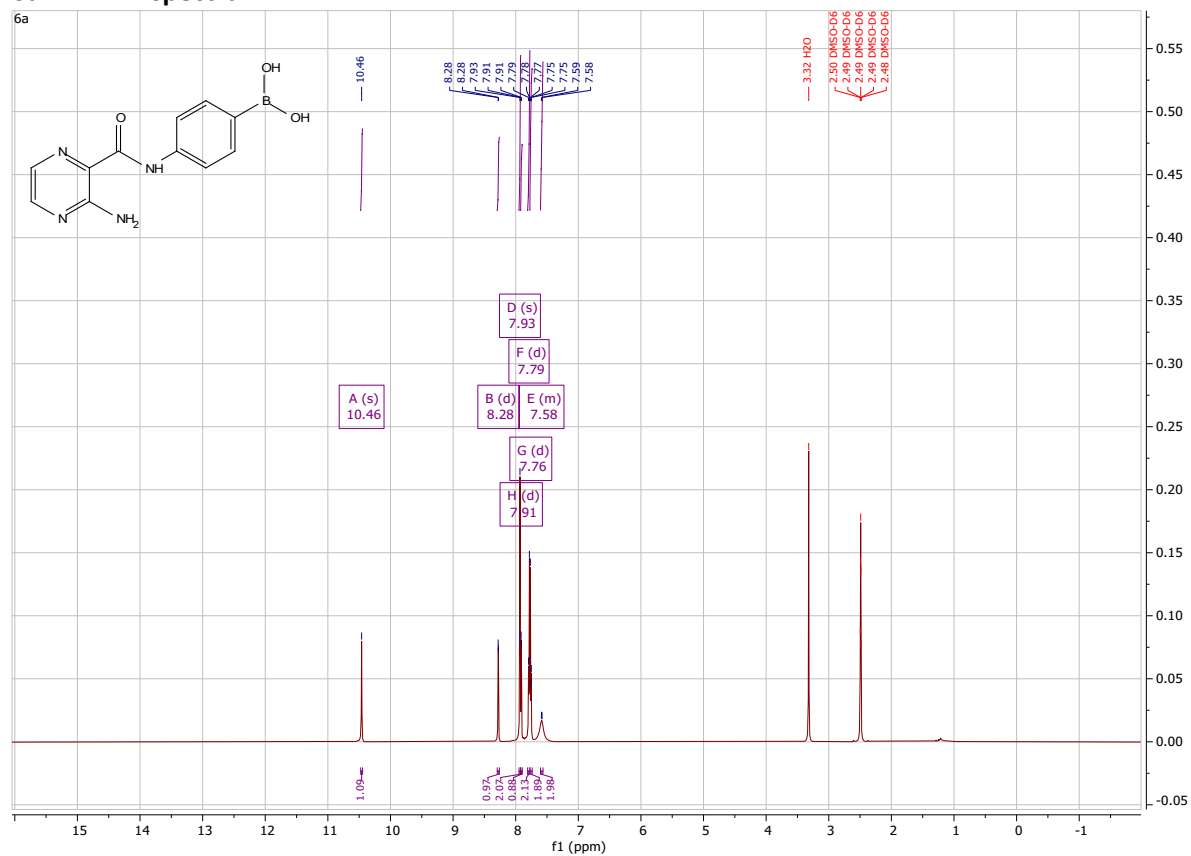

### 6a <sup>13</sup>C NMR spectrum

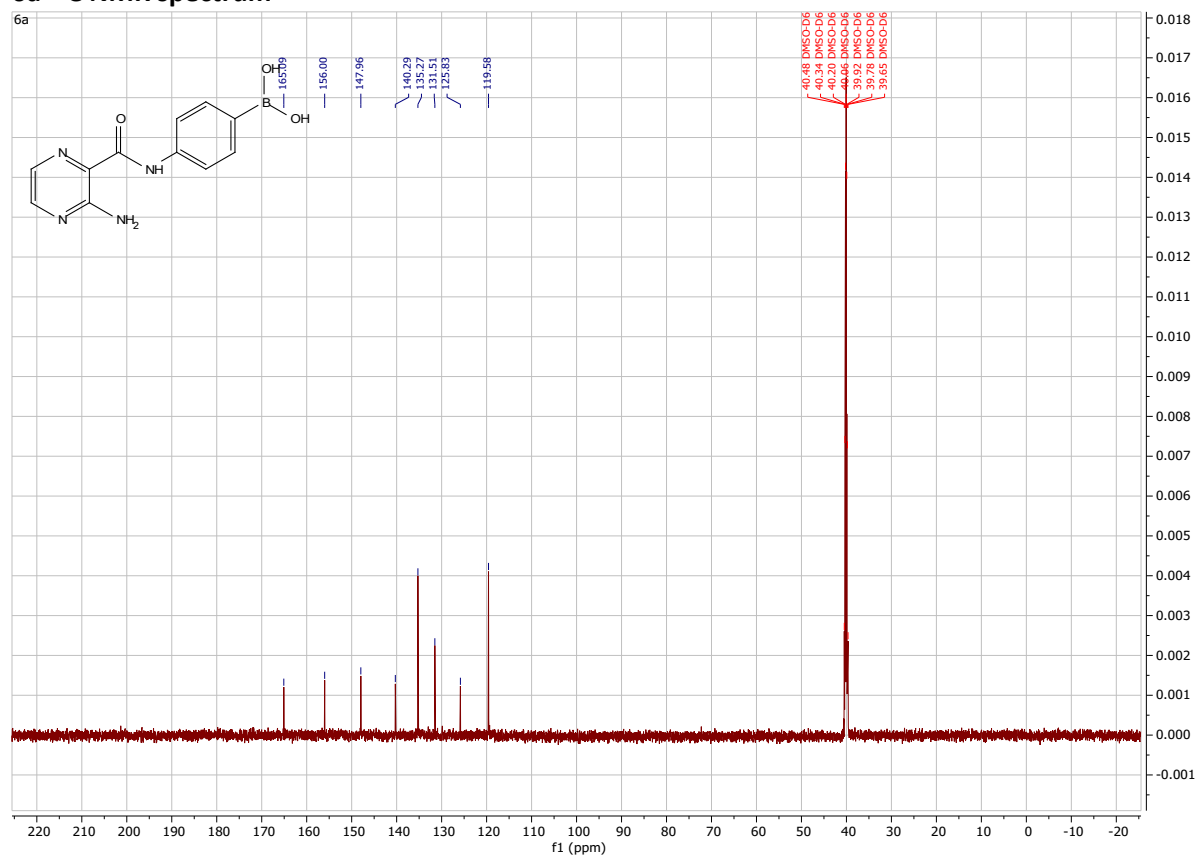

### 6a <sup>11</sup>B NMR spectrum

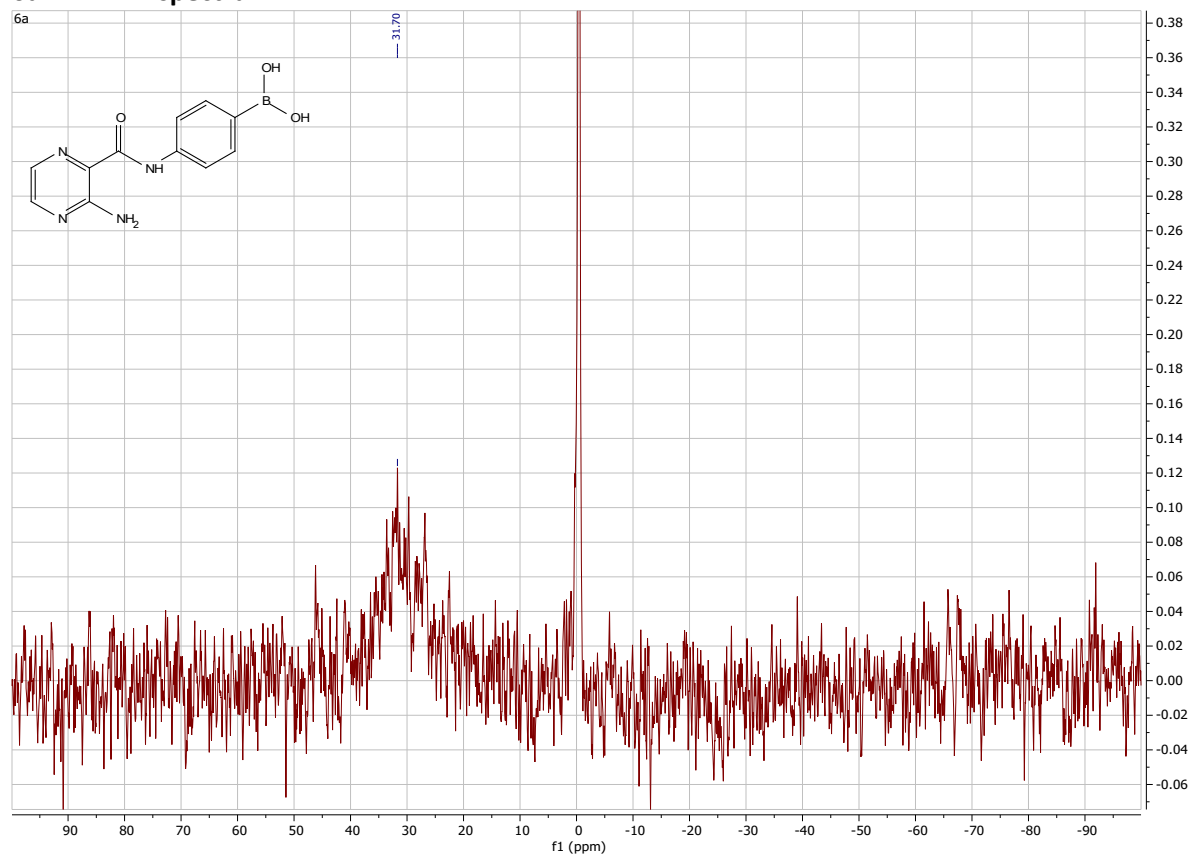

### 7a <sup>1</sup>H NMR spectrum

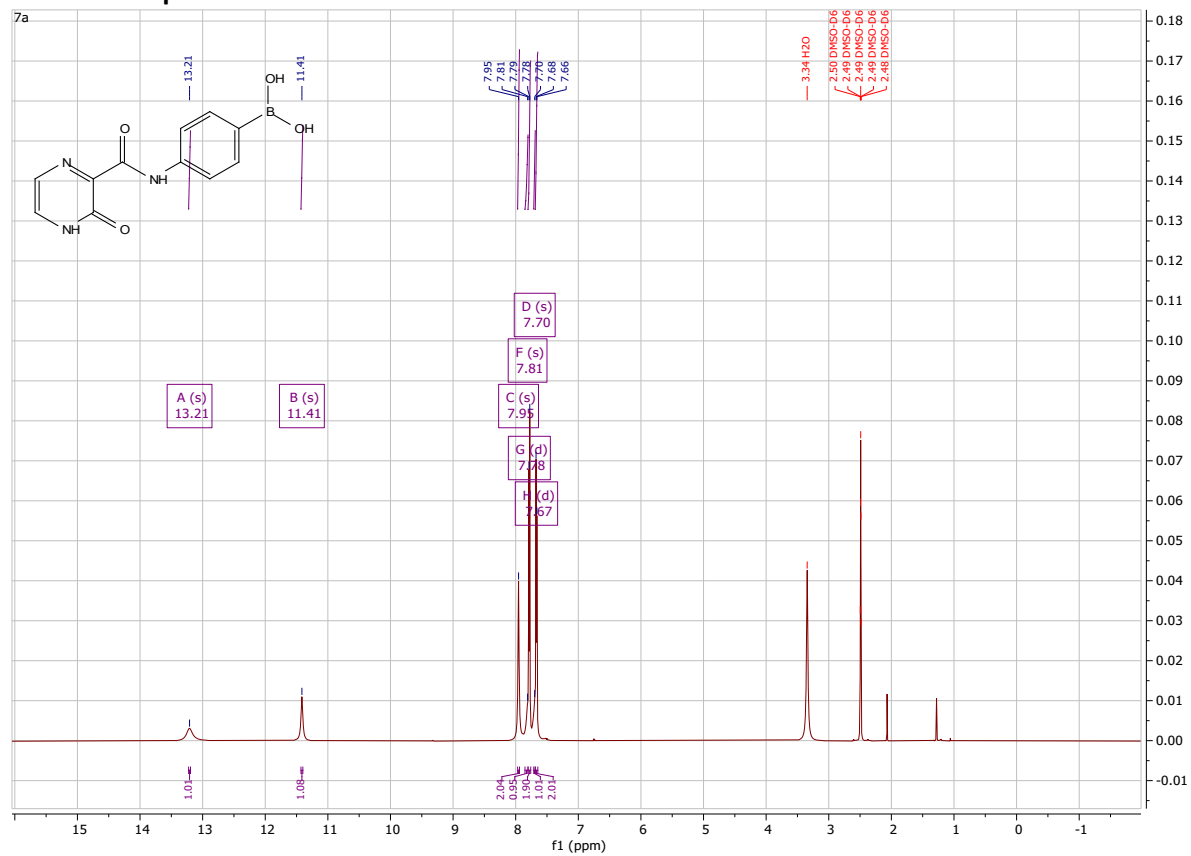



### 7a <sup>11</sup>B NMR spectrum

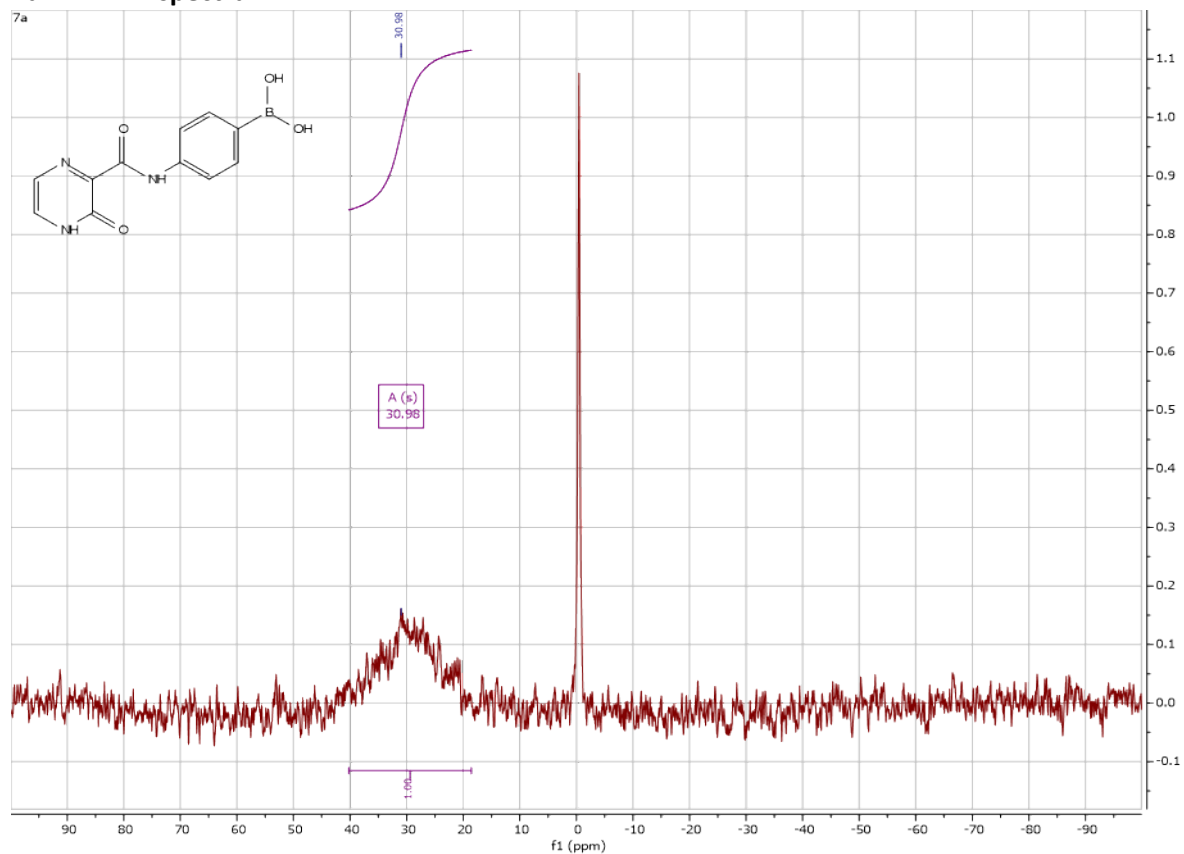

### 8a <sup>1</sup>H NMR spectrum

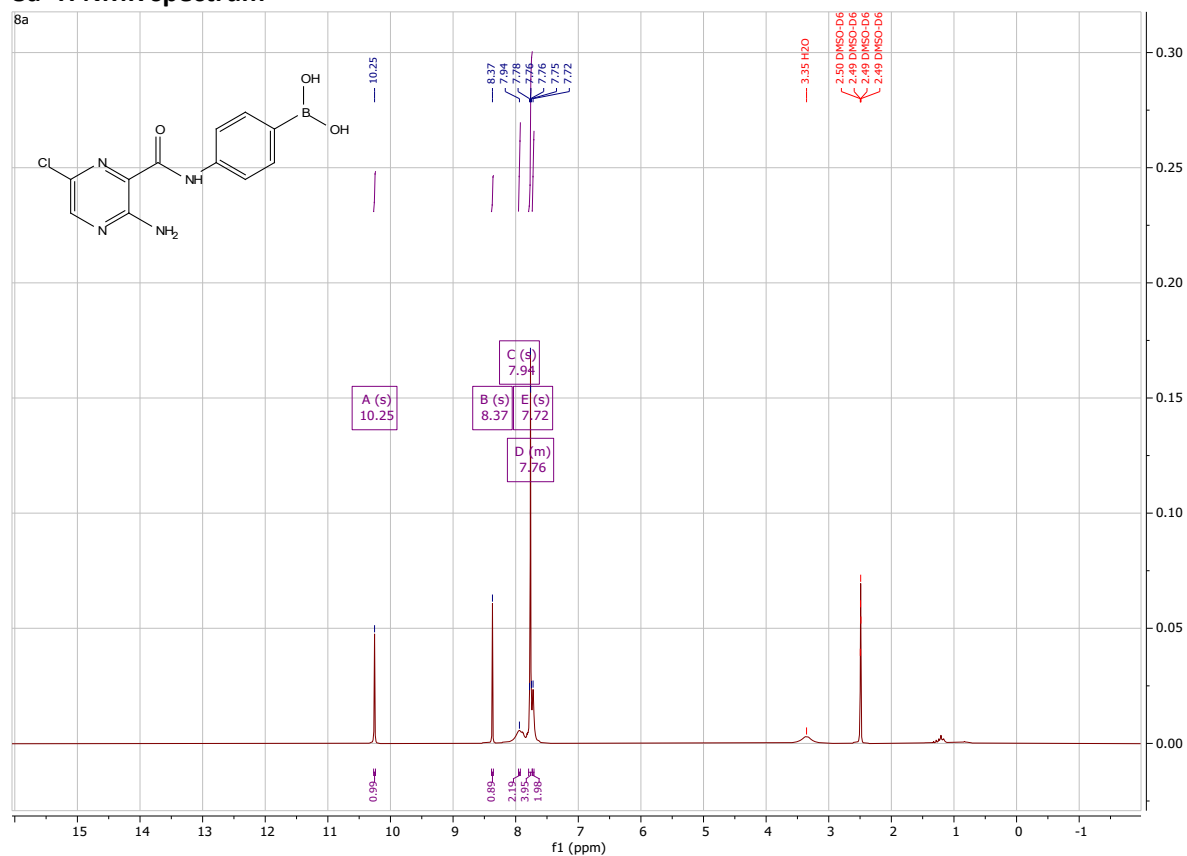

### 8a <sup>13</sup>C NMR spectrum

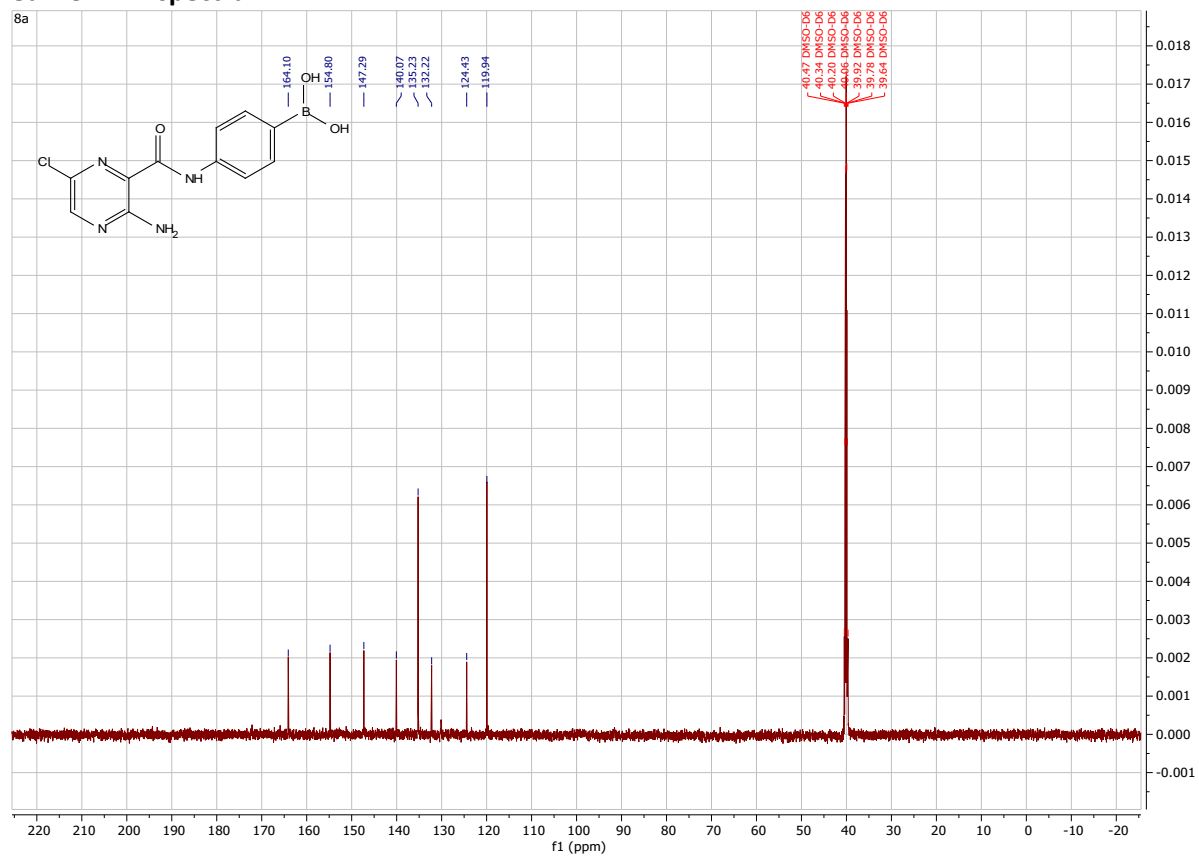

### 8a <sup>11</sup>B NMR spectrum

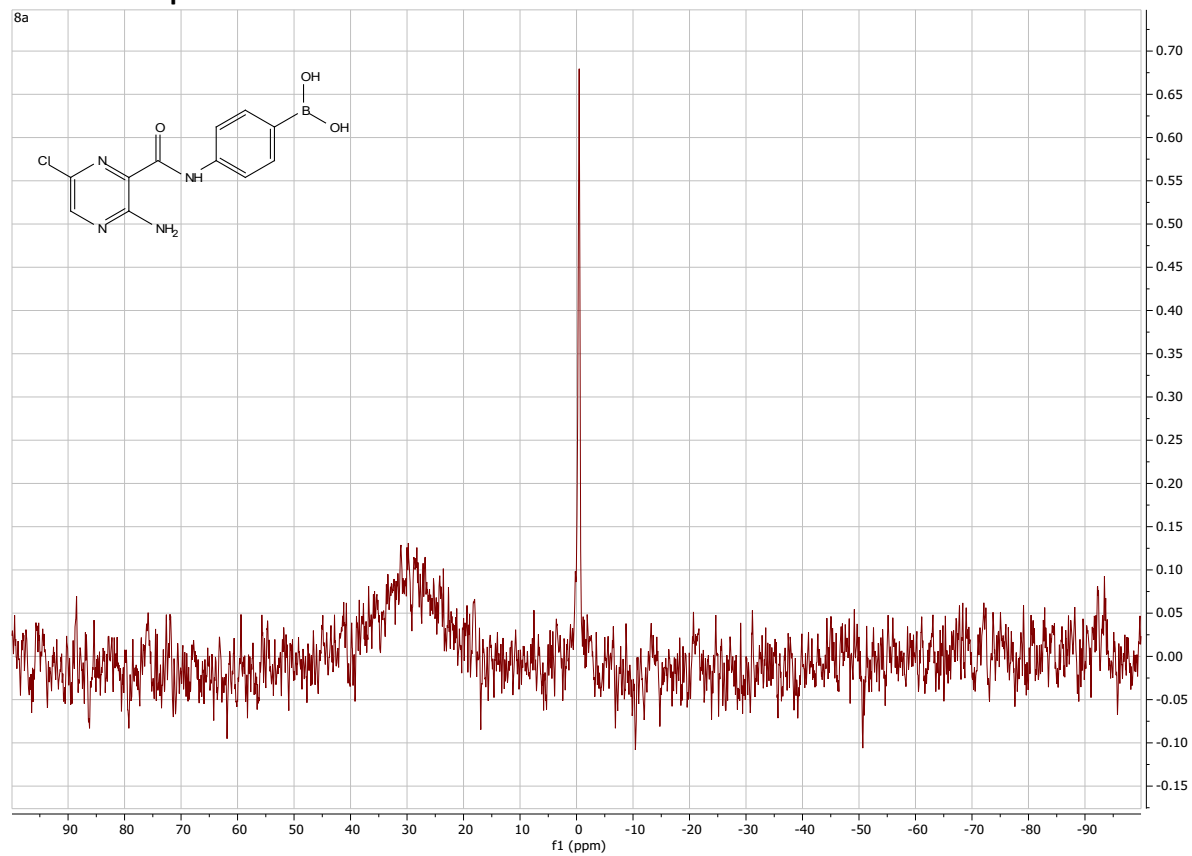

### 9a <sup>1</sup>H NMR spectrum

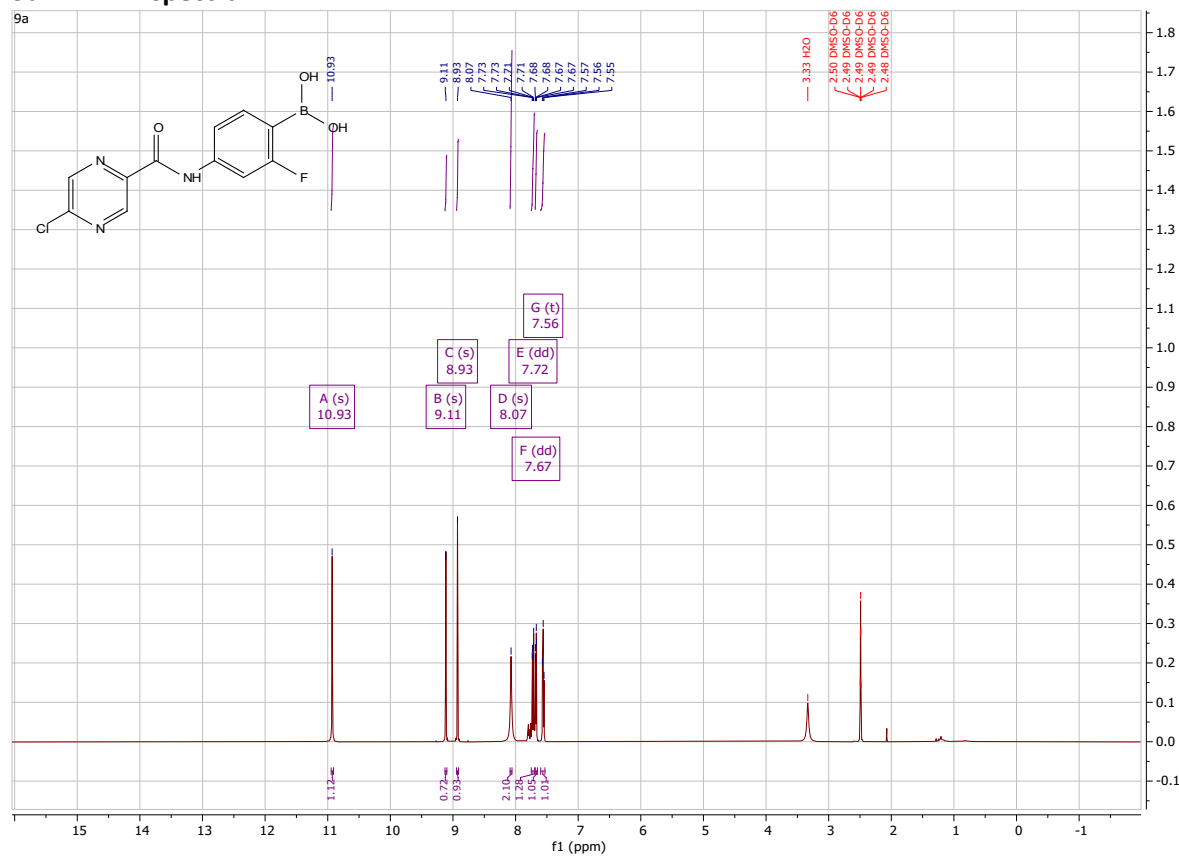

### 9a <sup>13</sup>C NMR spectrum

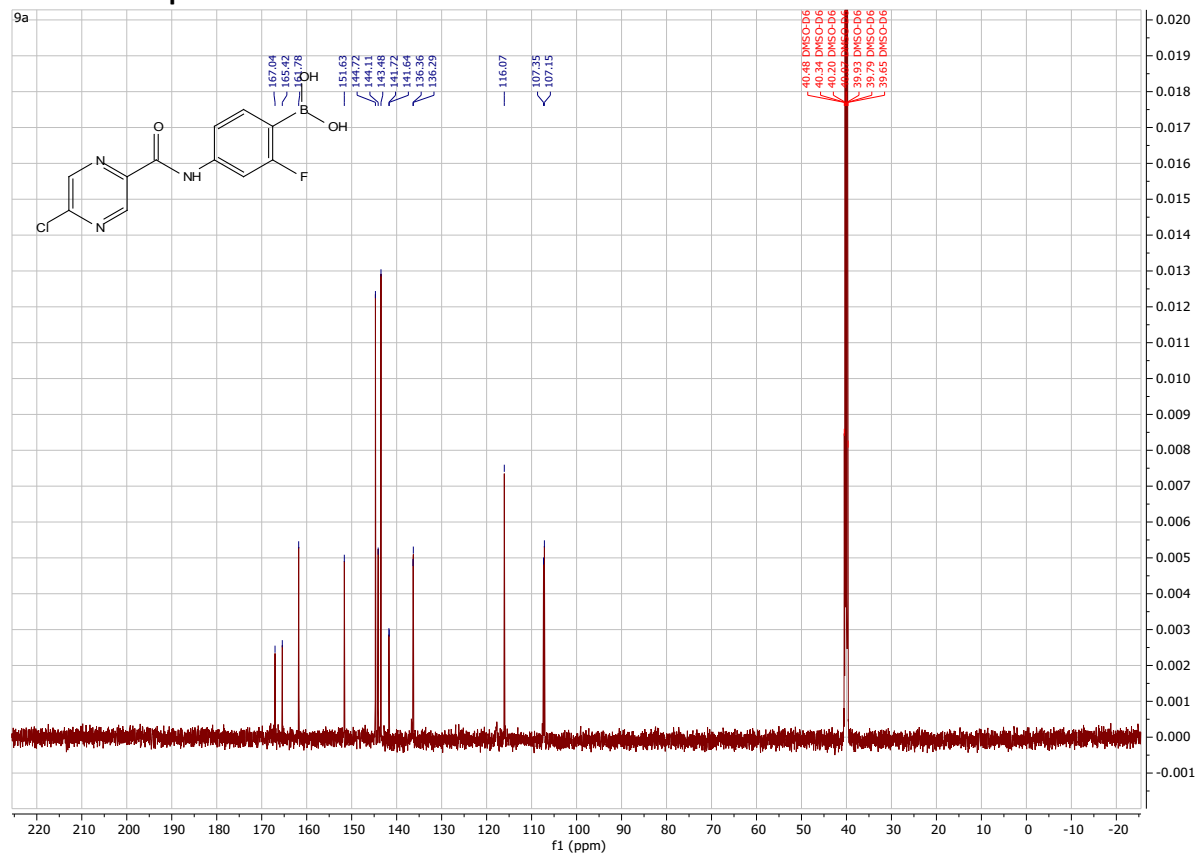

### 9a <sup>11</sup>B NMR spectrum

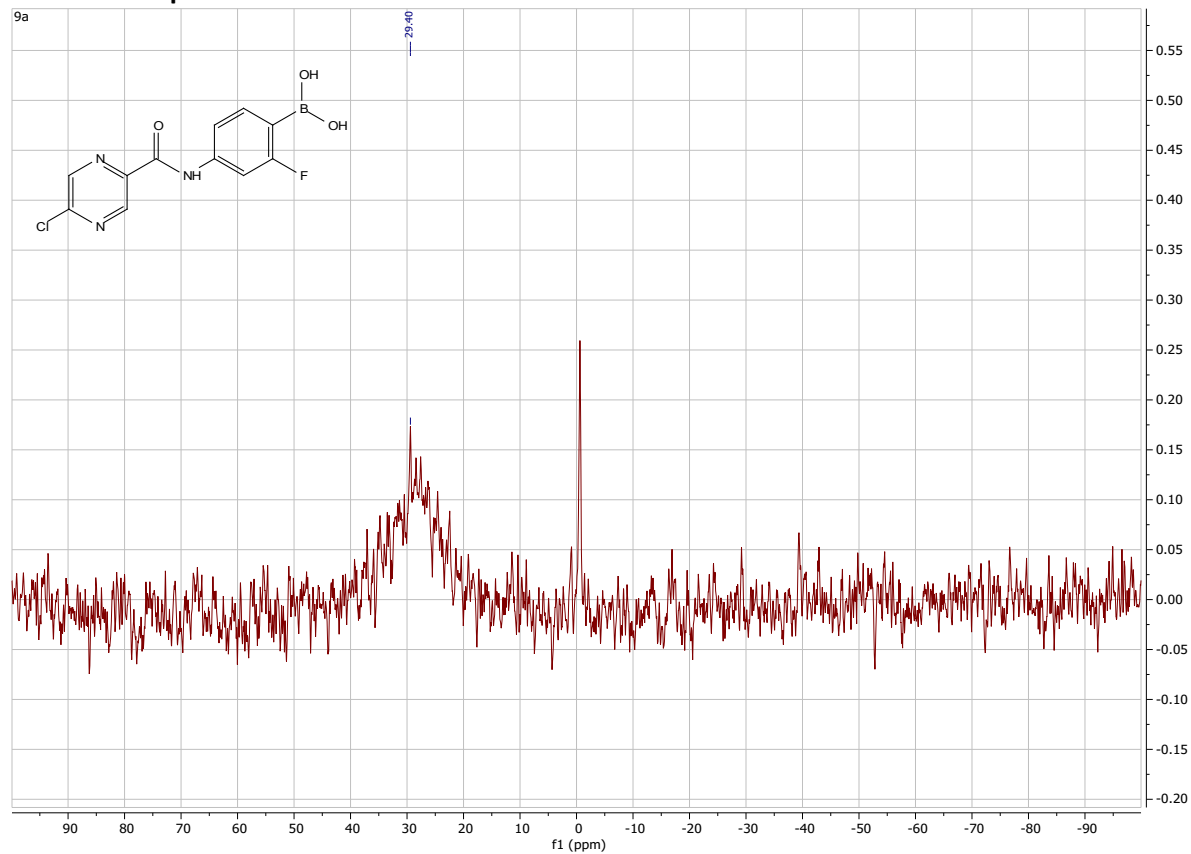

### 10a <sup>1</sup>H NMR spectrum

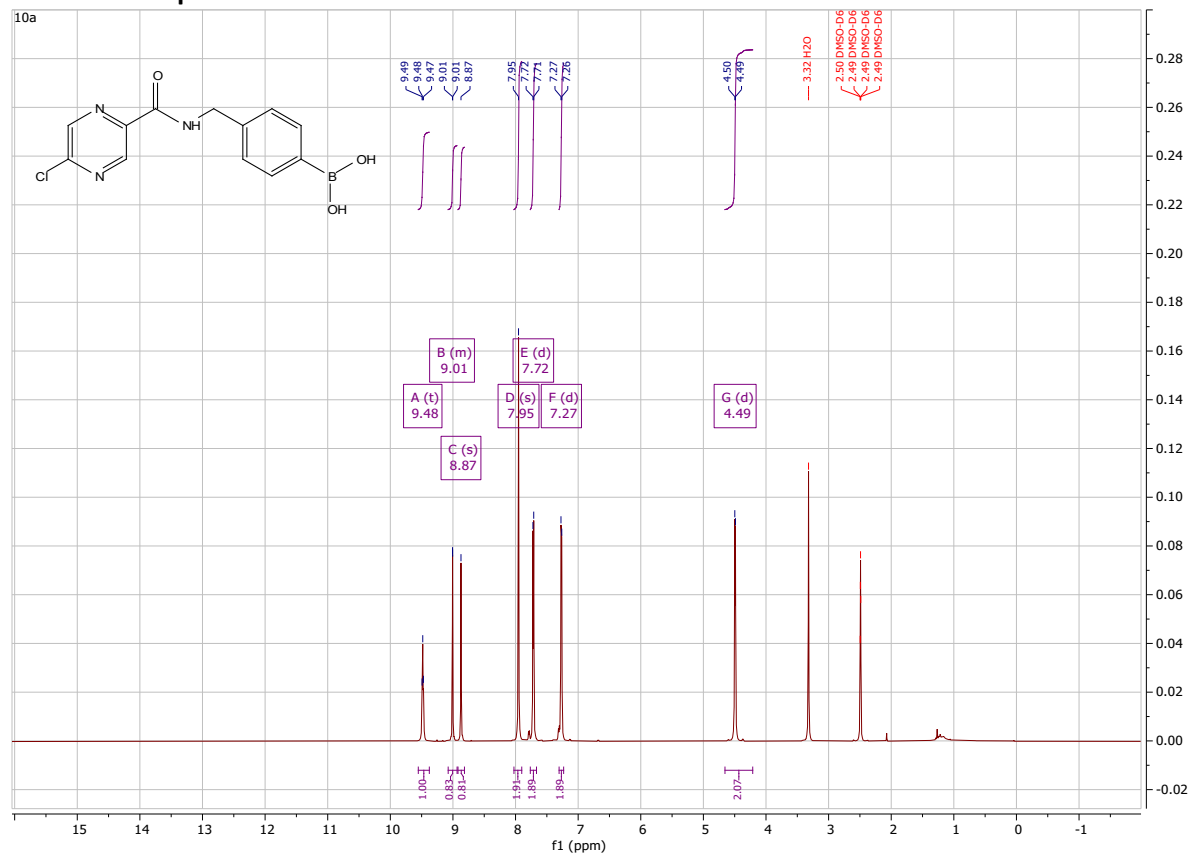

### 10a <sup>13</sup>C NMR spectrum

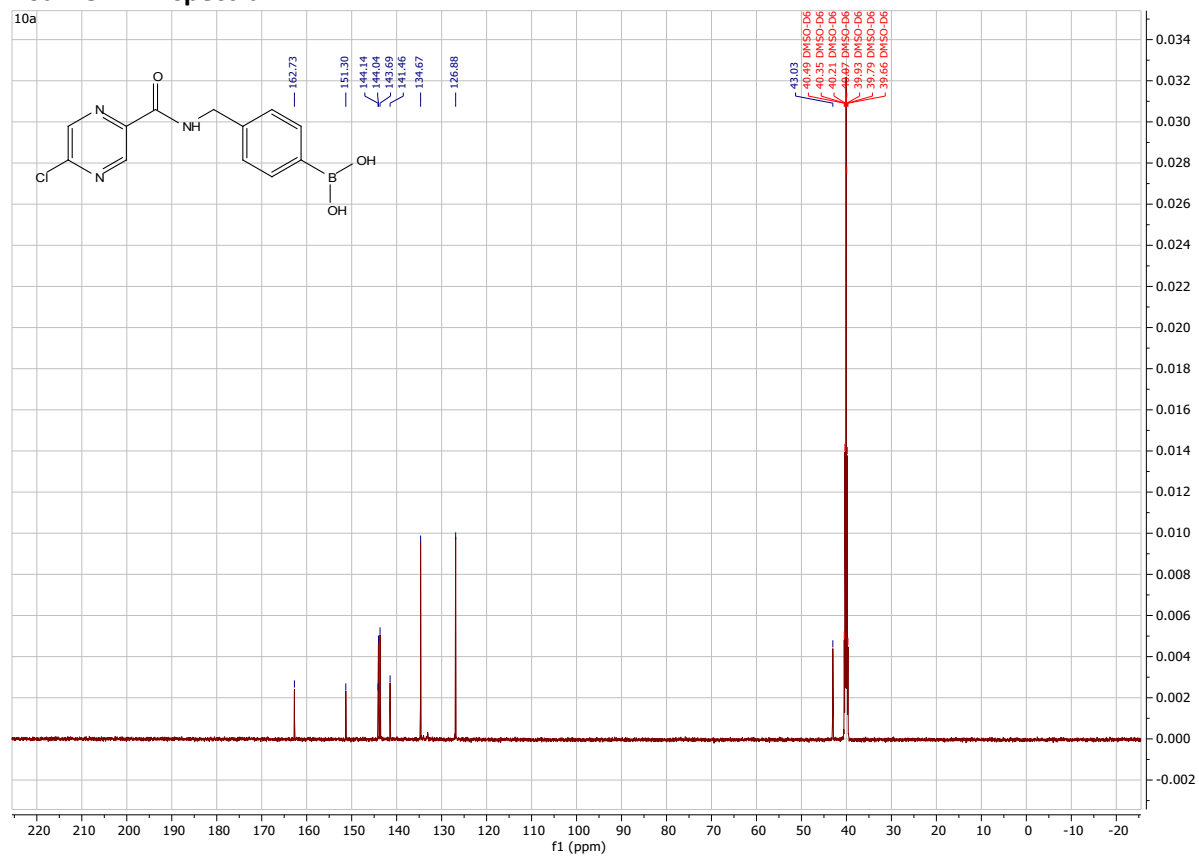

### 10a <sup>11</sup>B NMR spectrum

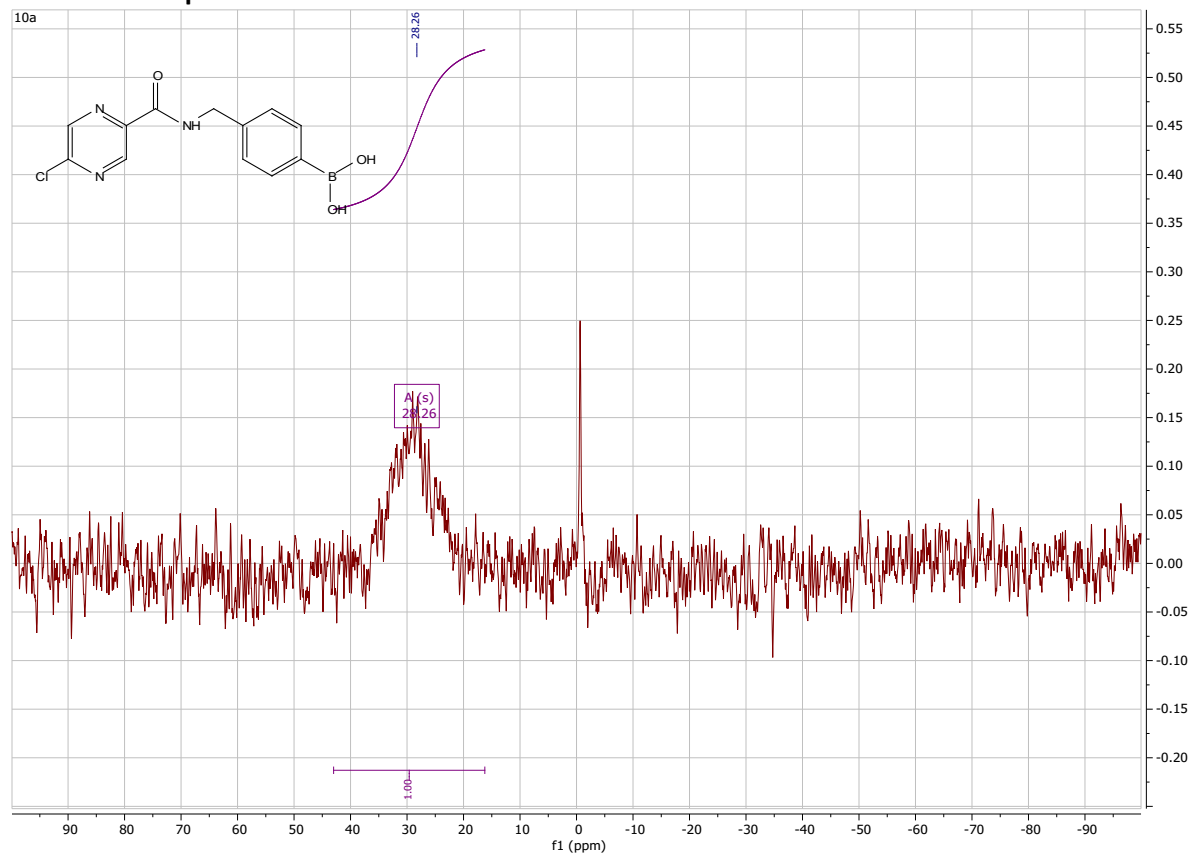

### 11a <sup>1</sup>H NMR spectrum

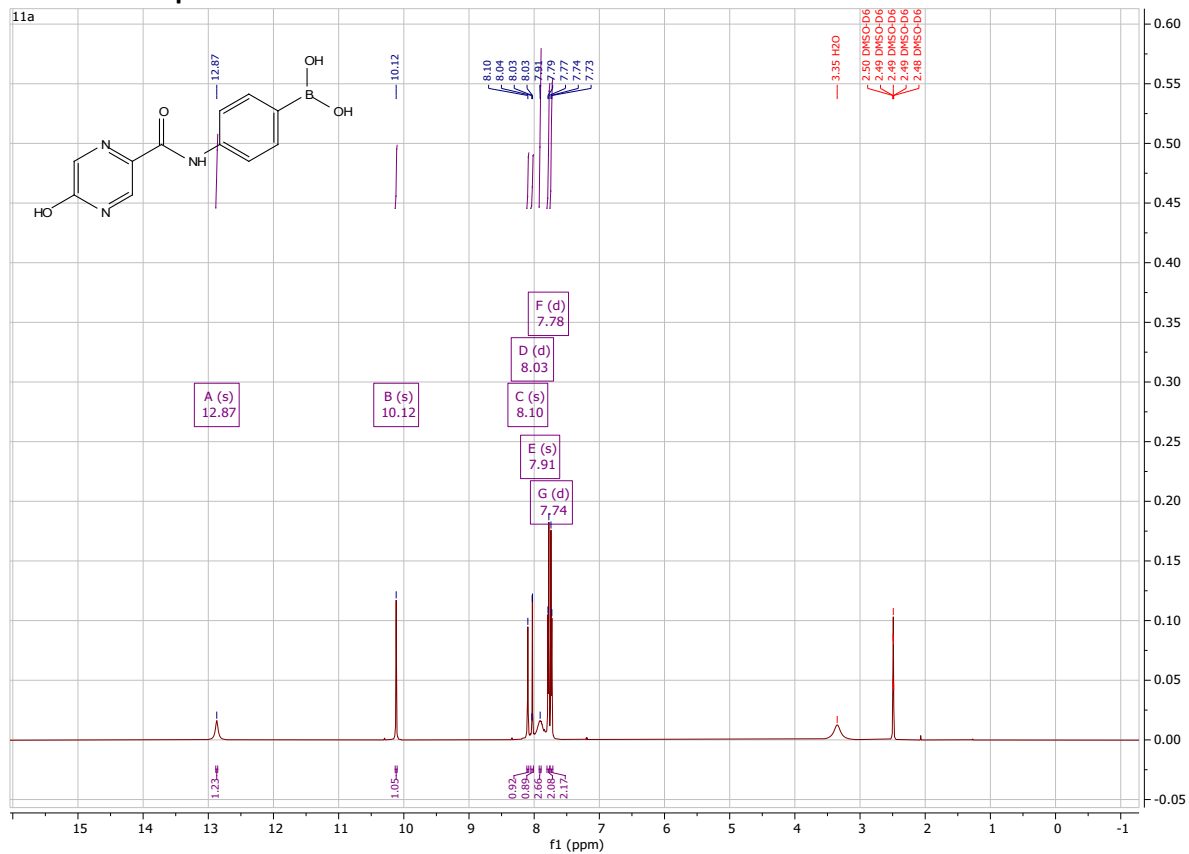

### 11a <sup>13</sup>C NMR spectrum

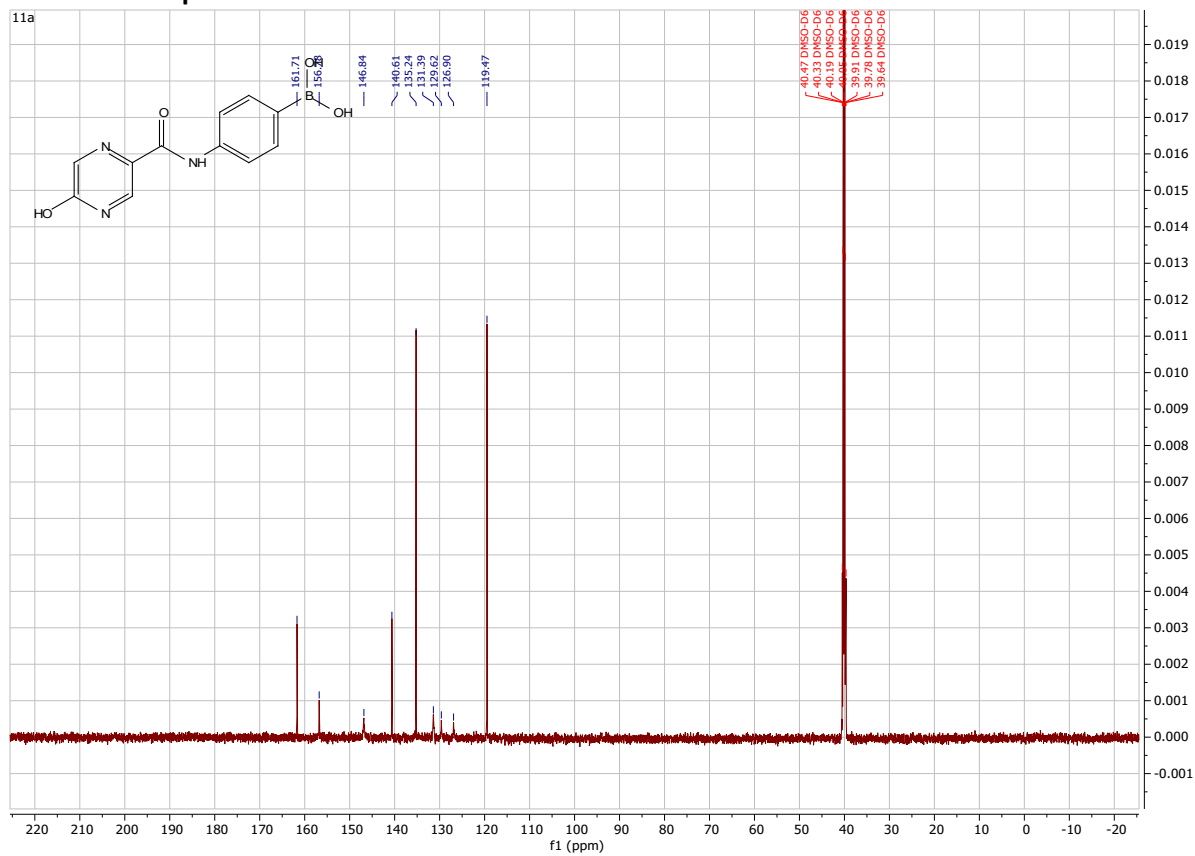

### 11a <sup>11</sup>B NMR spectrum

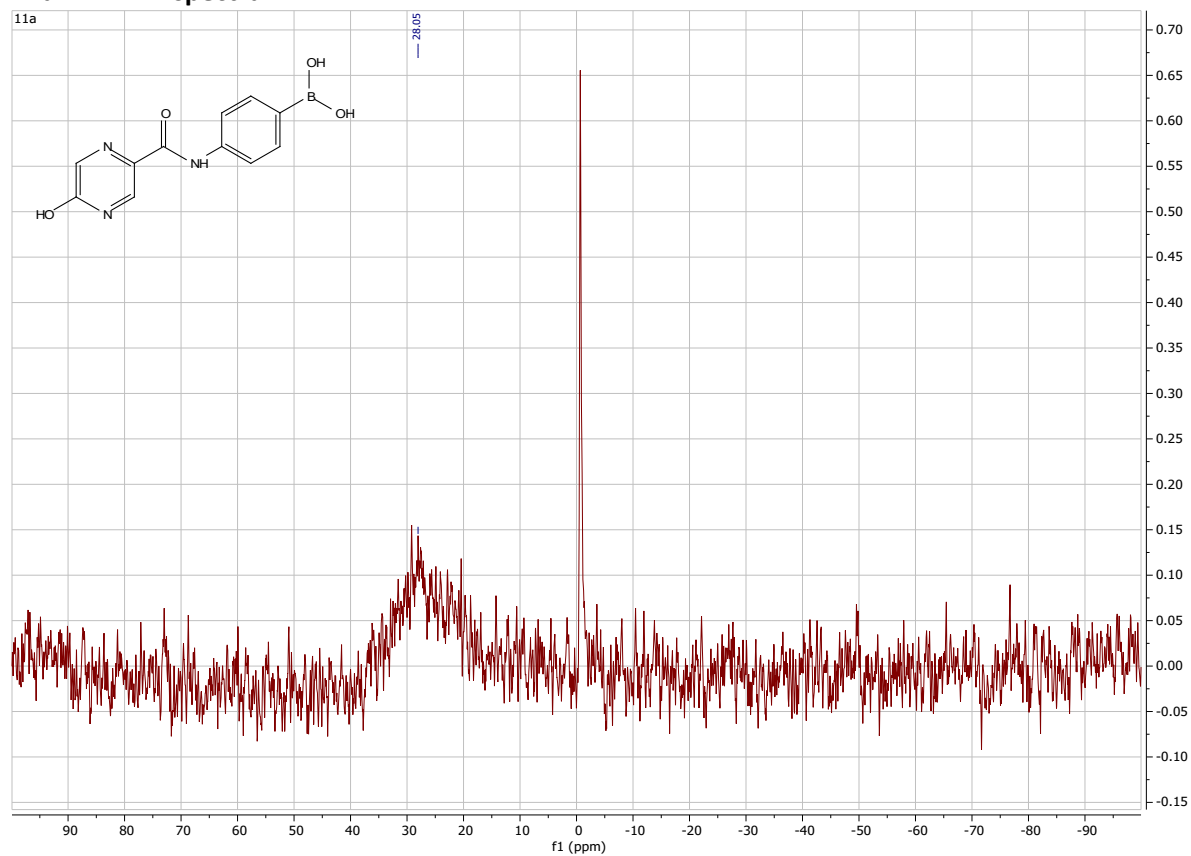

### 12a <sup>1</sup>H NMR spectrum

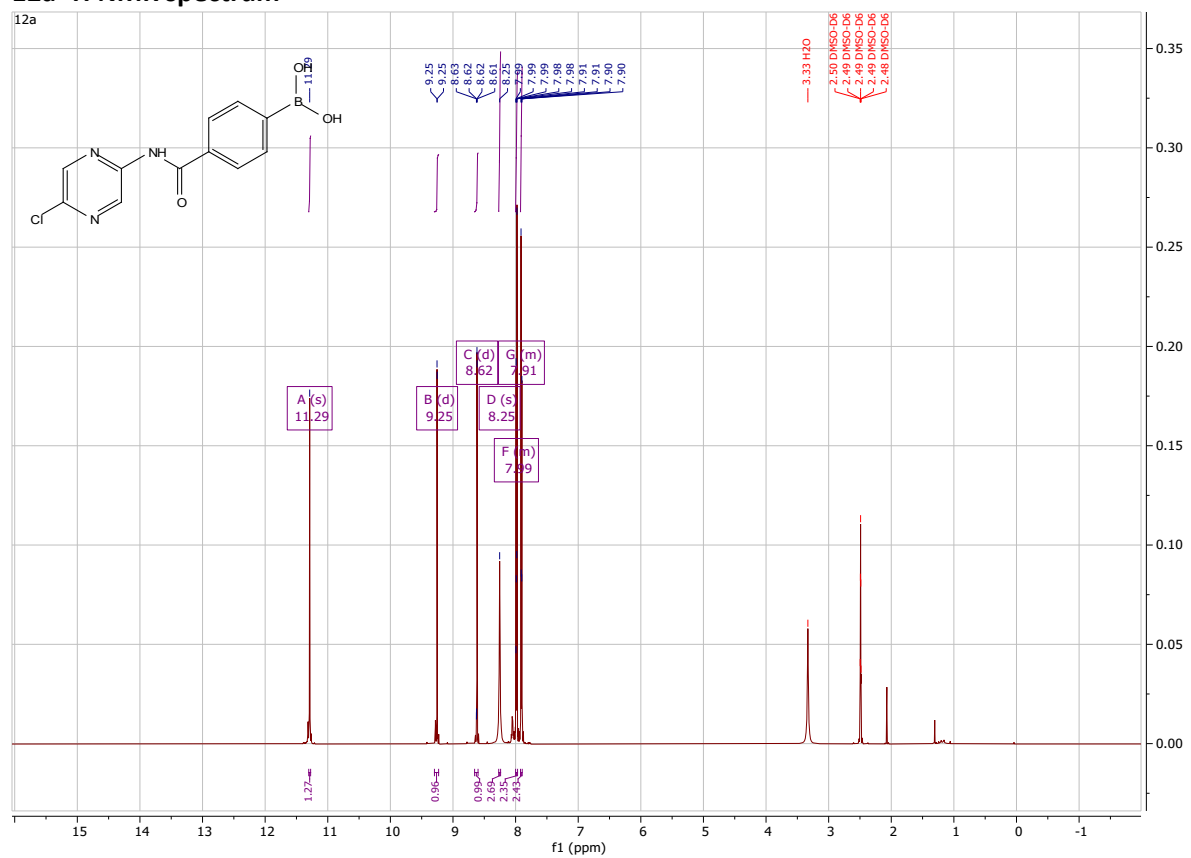

## 12a <sup>13</sup>C NMR spectrum

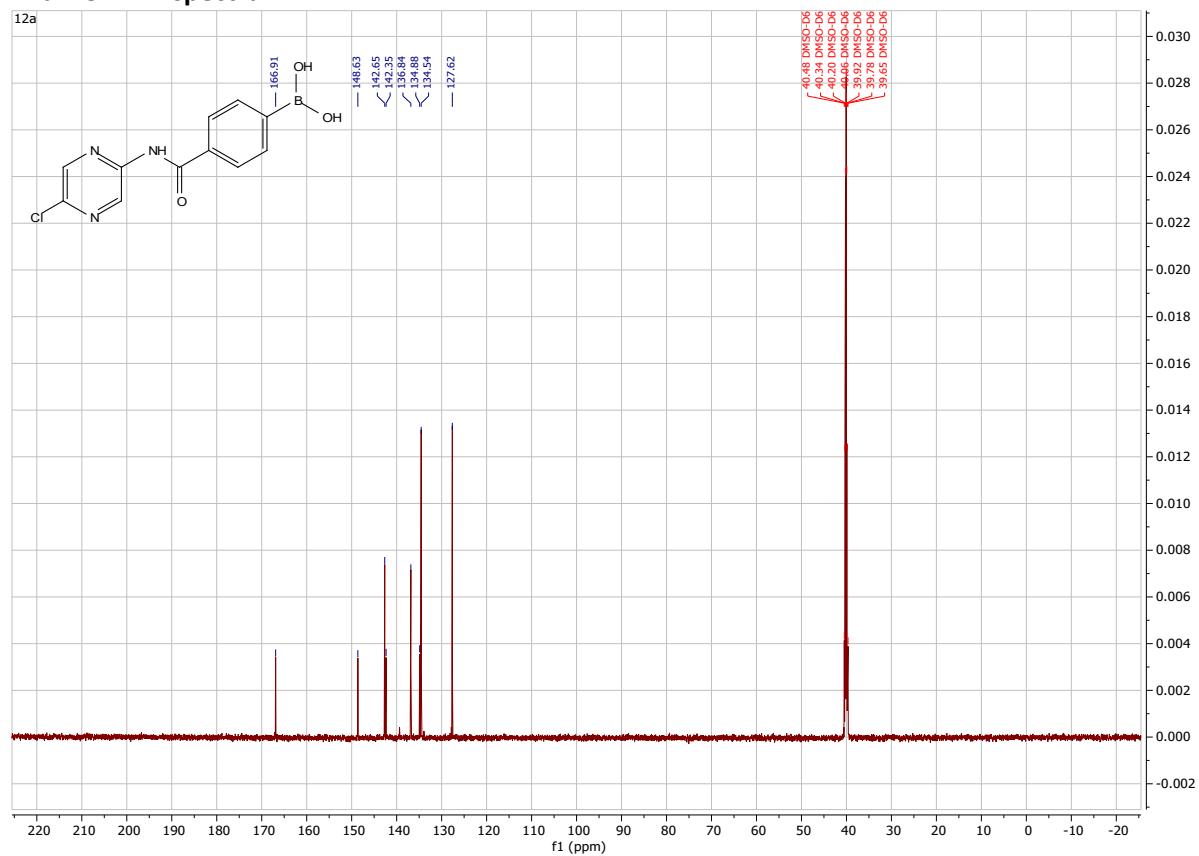

## 12a <sup>11</sup>B NMR spectrum

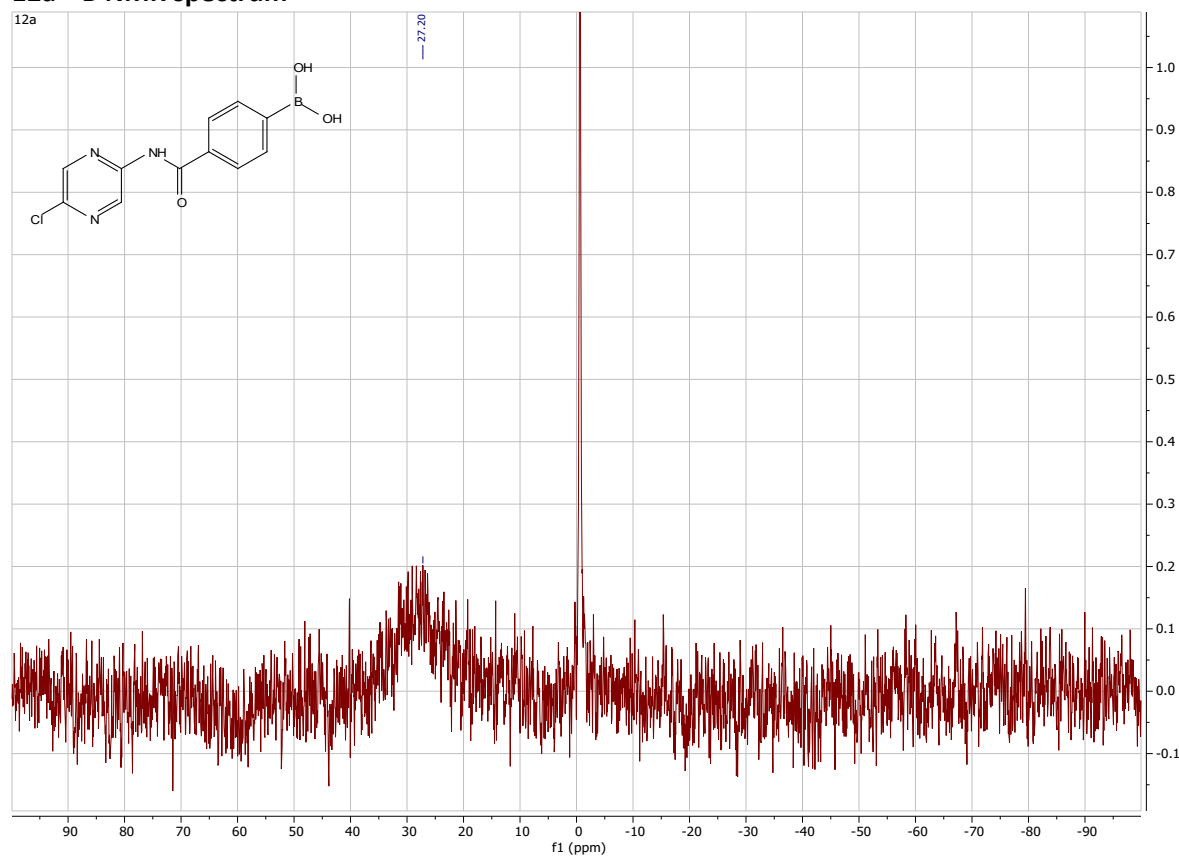



### 13a <sup>1</sup>H NMR spectrum

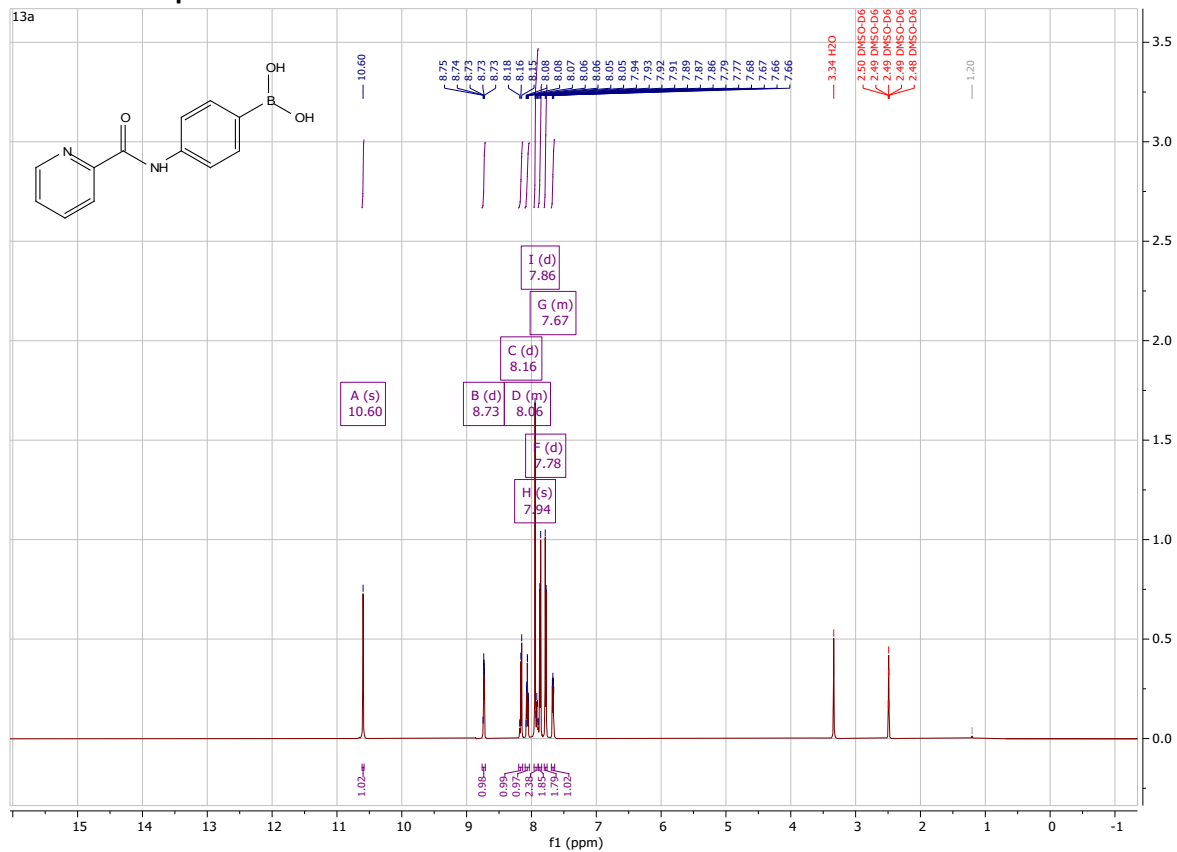

### 13a <sup>13</sup>C NMR spectrum

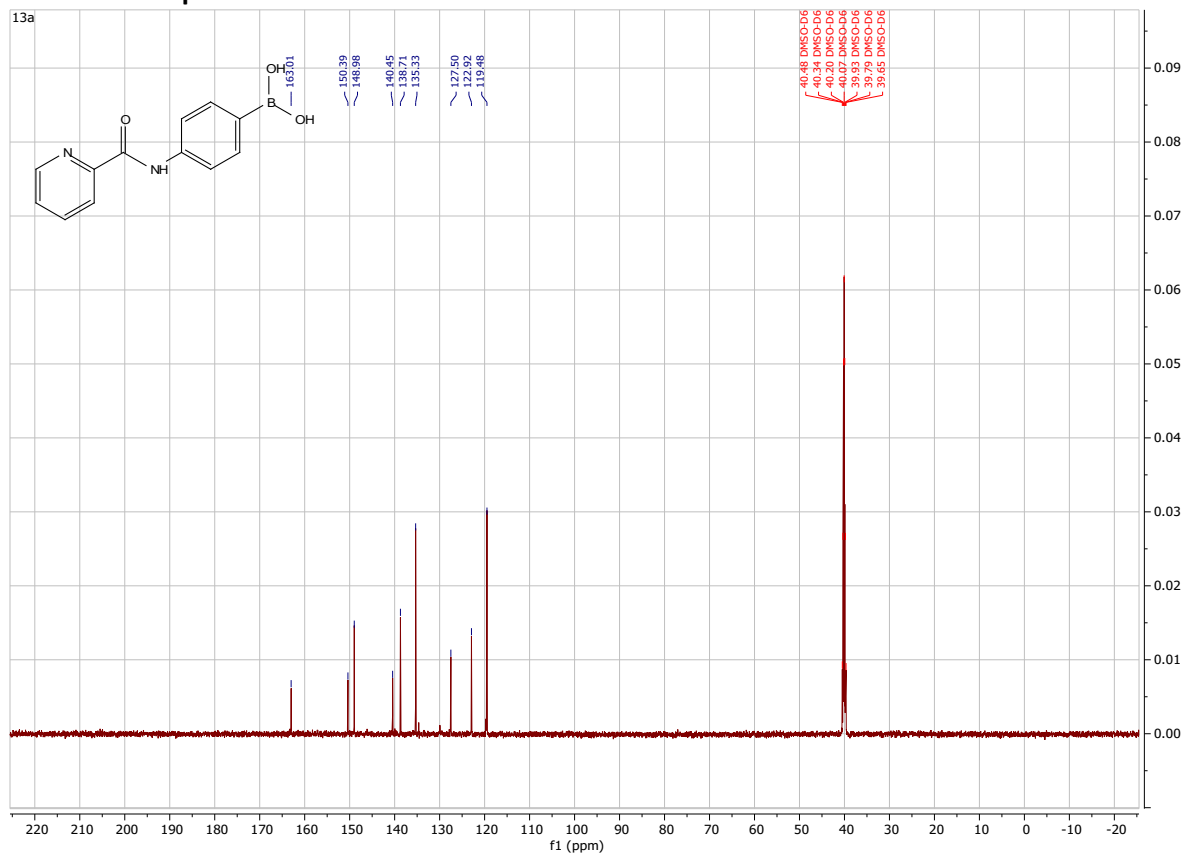

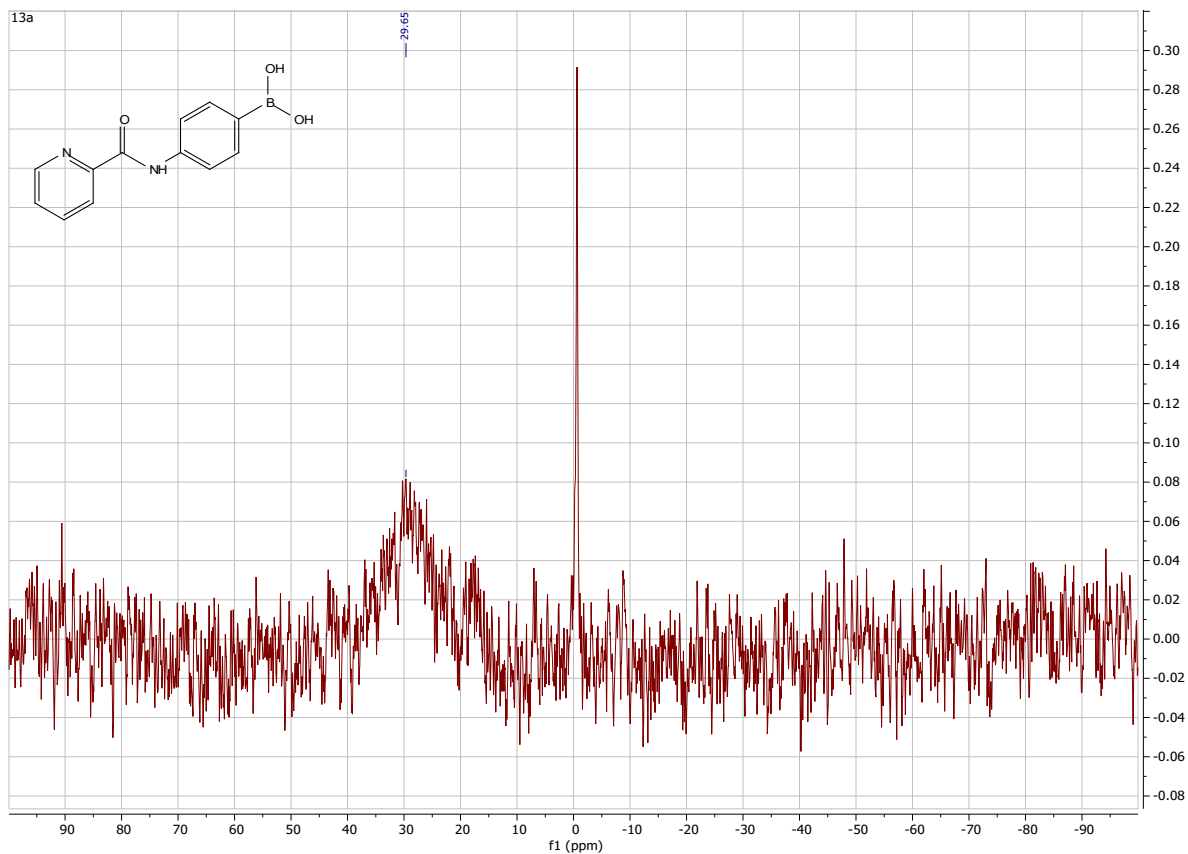

### 14a <sup>1</sup>H NMR spectrum

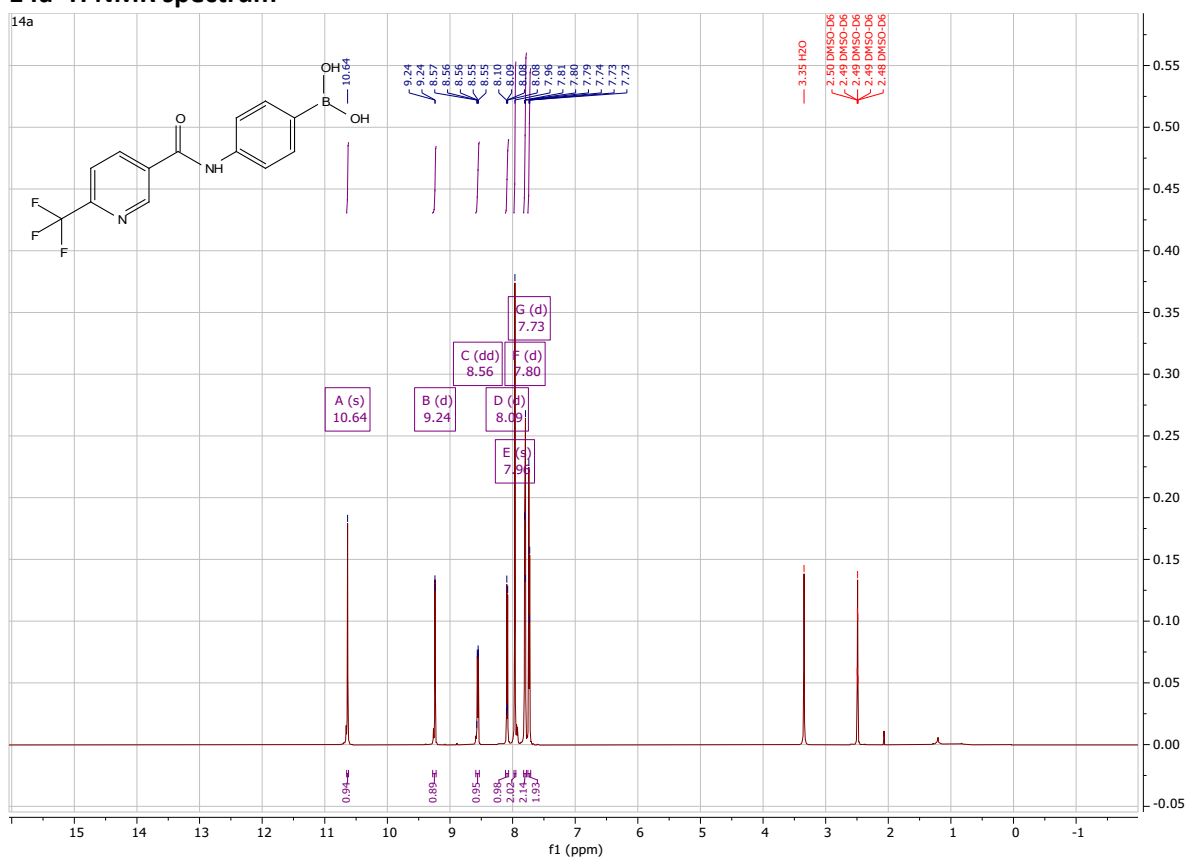

### 14a <sup>13</sup>C NMR spectrum

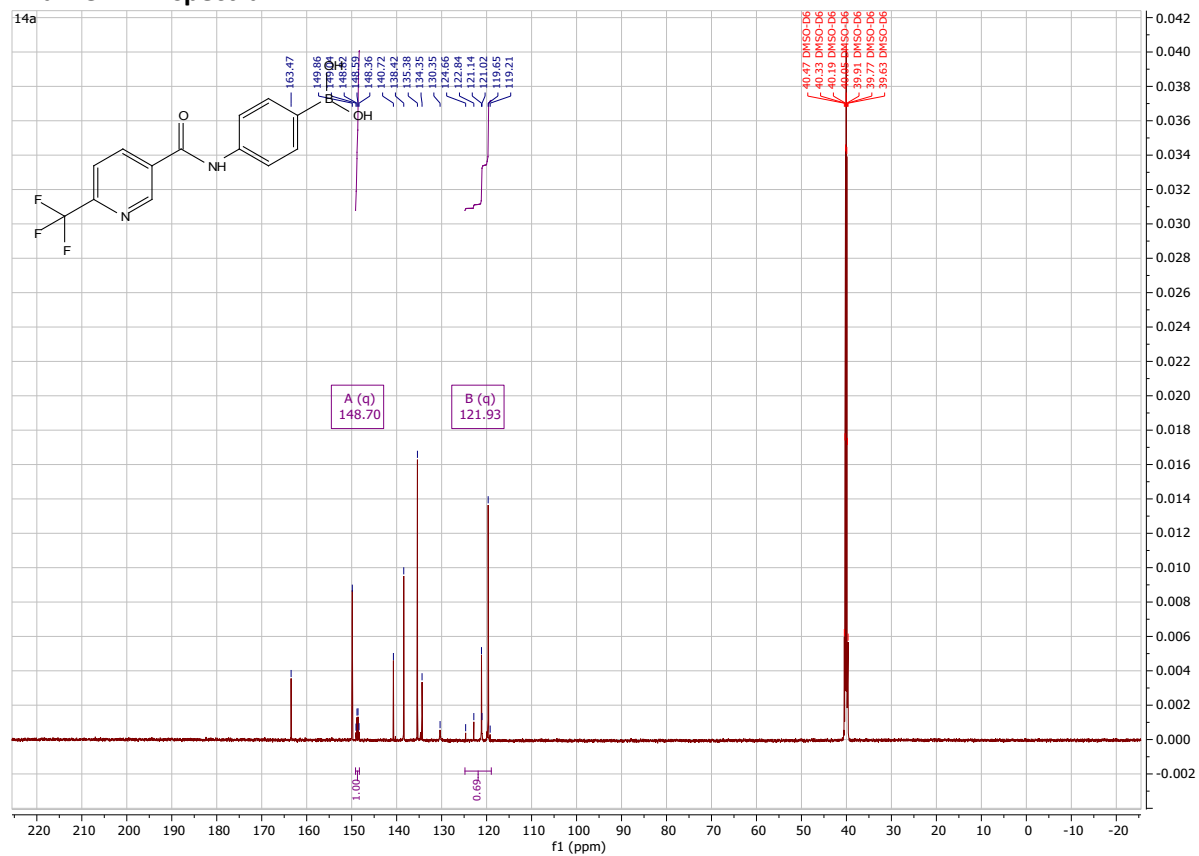

### 14a <sup>11</sup>B NMR spectrum

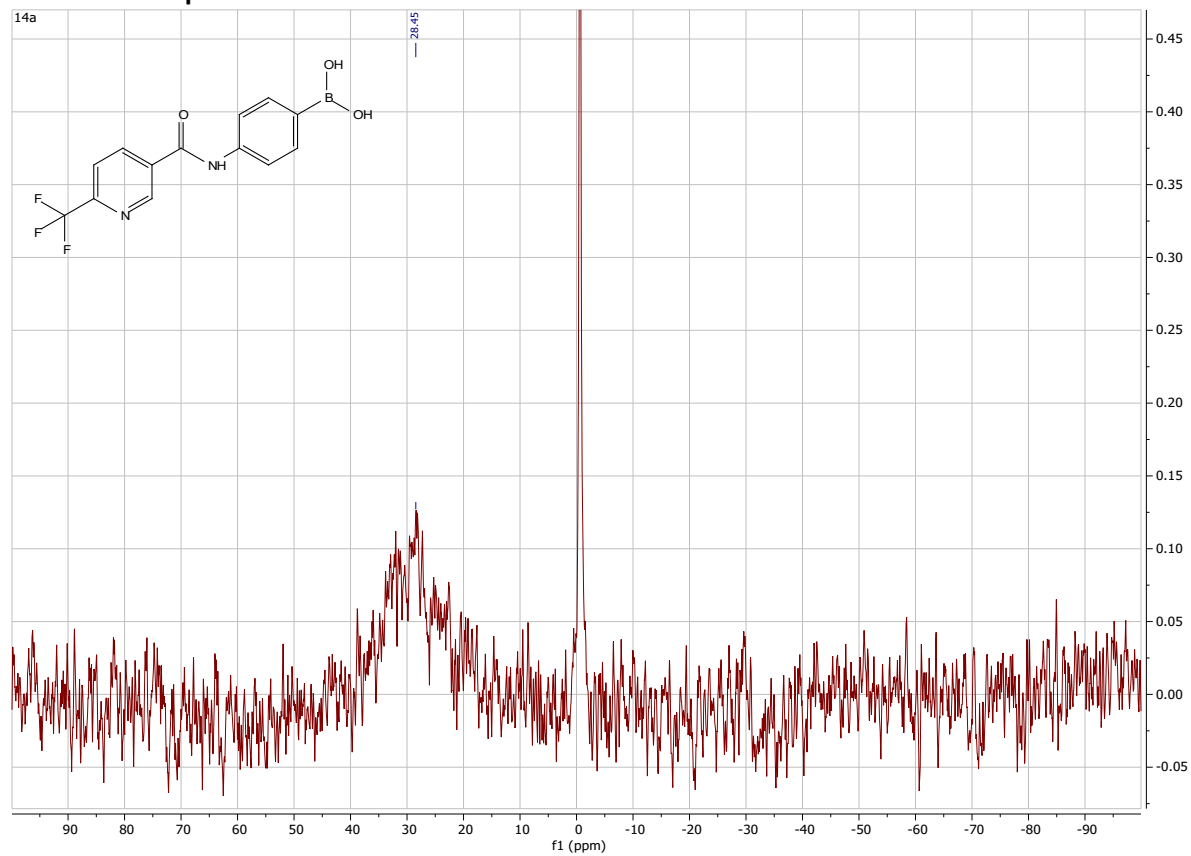

### 15a <sup>1</sup>H NMR spectrum

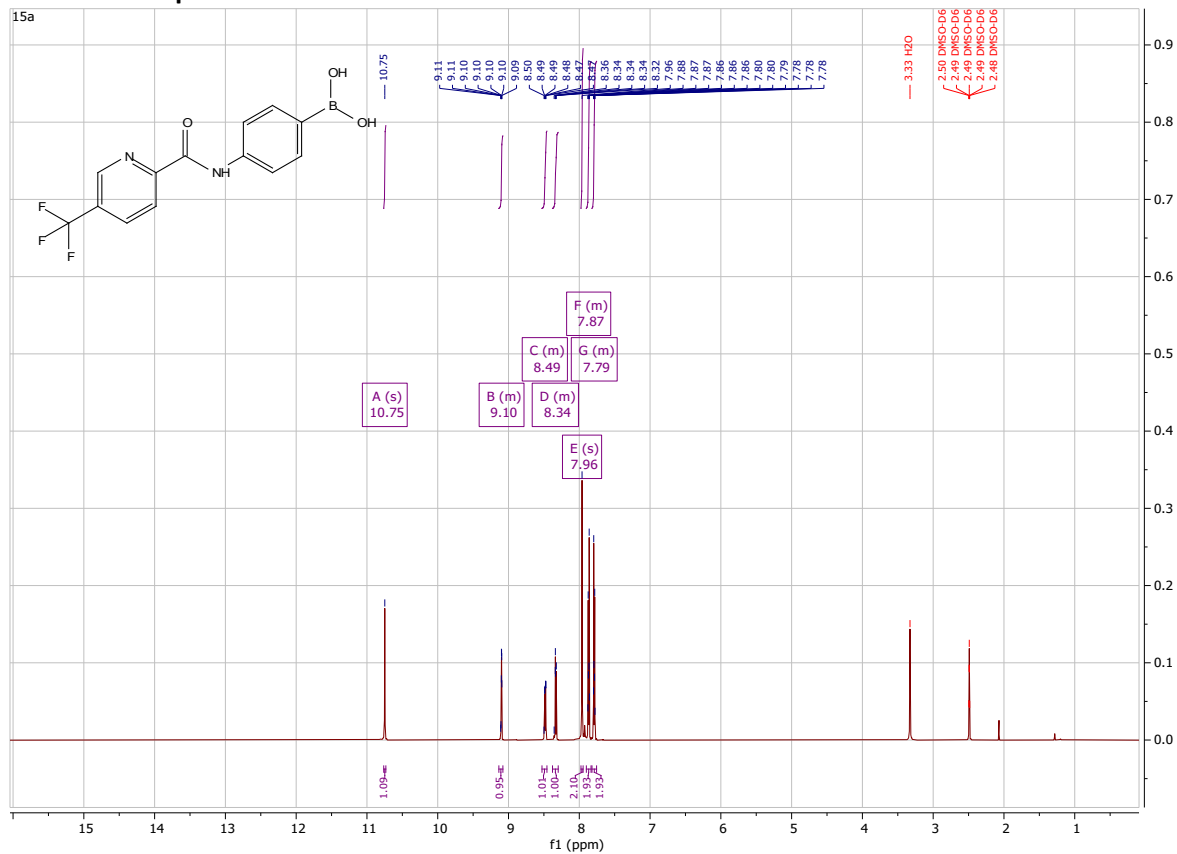

### 15a <sup>13</sup>C NMR spectrum

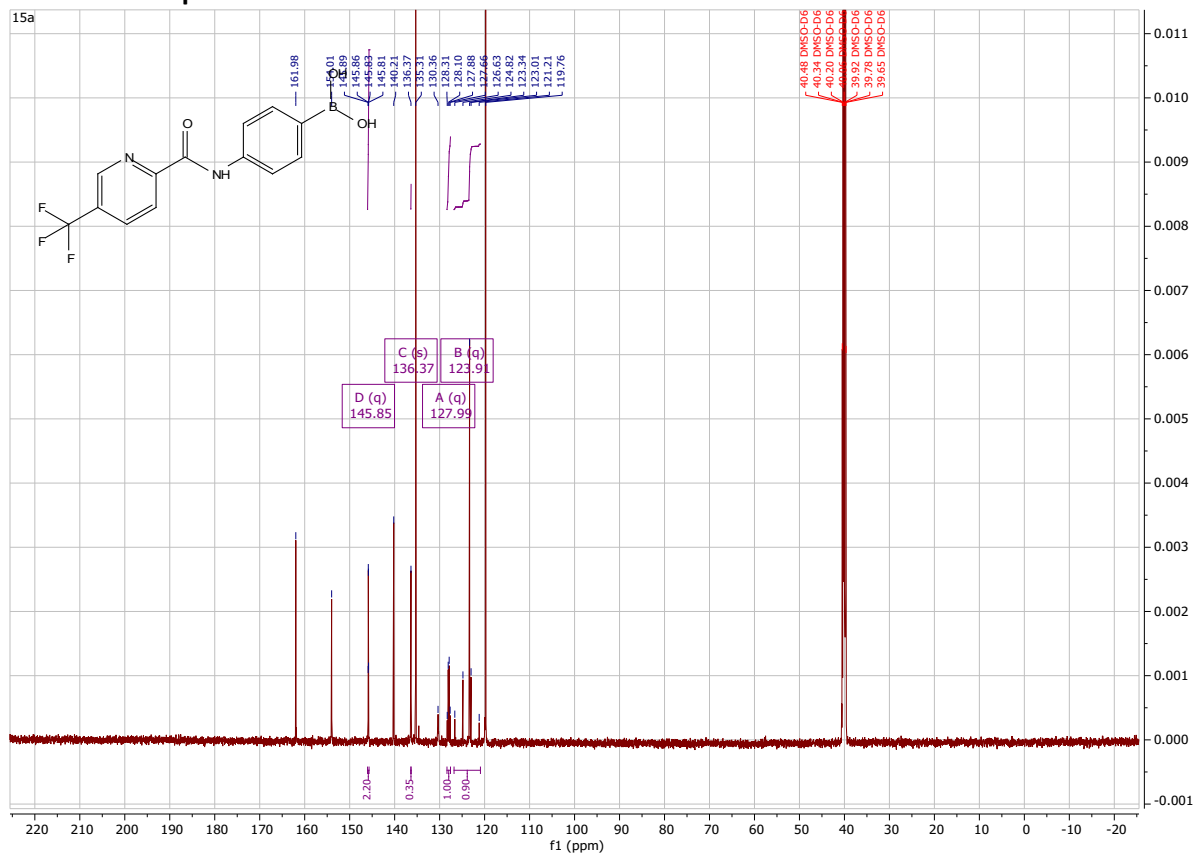

### 15a <sup>11</sup>B NMR spectrum

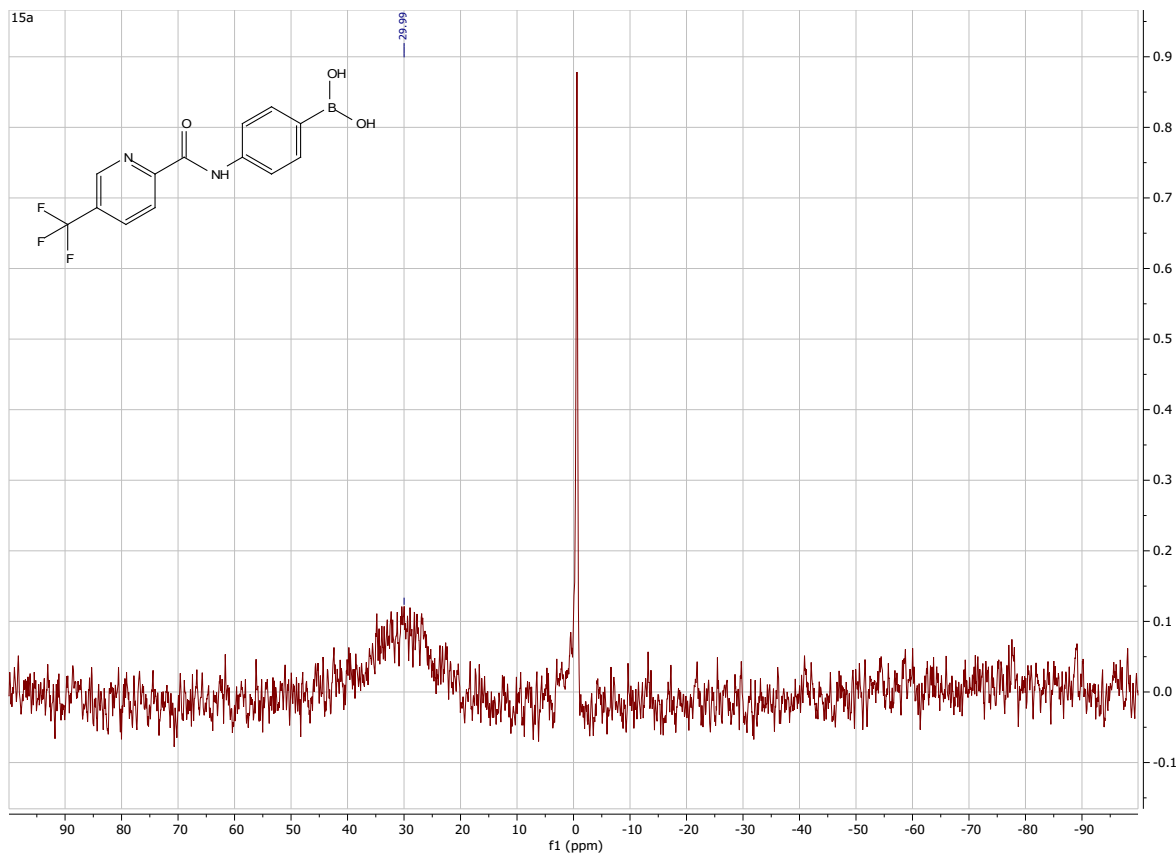

### 16a <sup>1</sup>H NMR spectrum

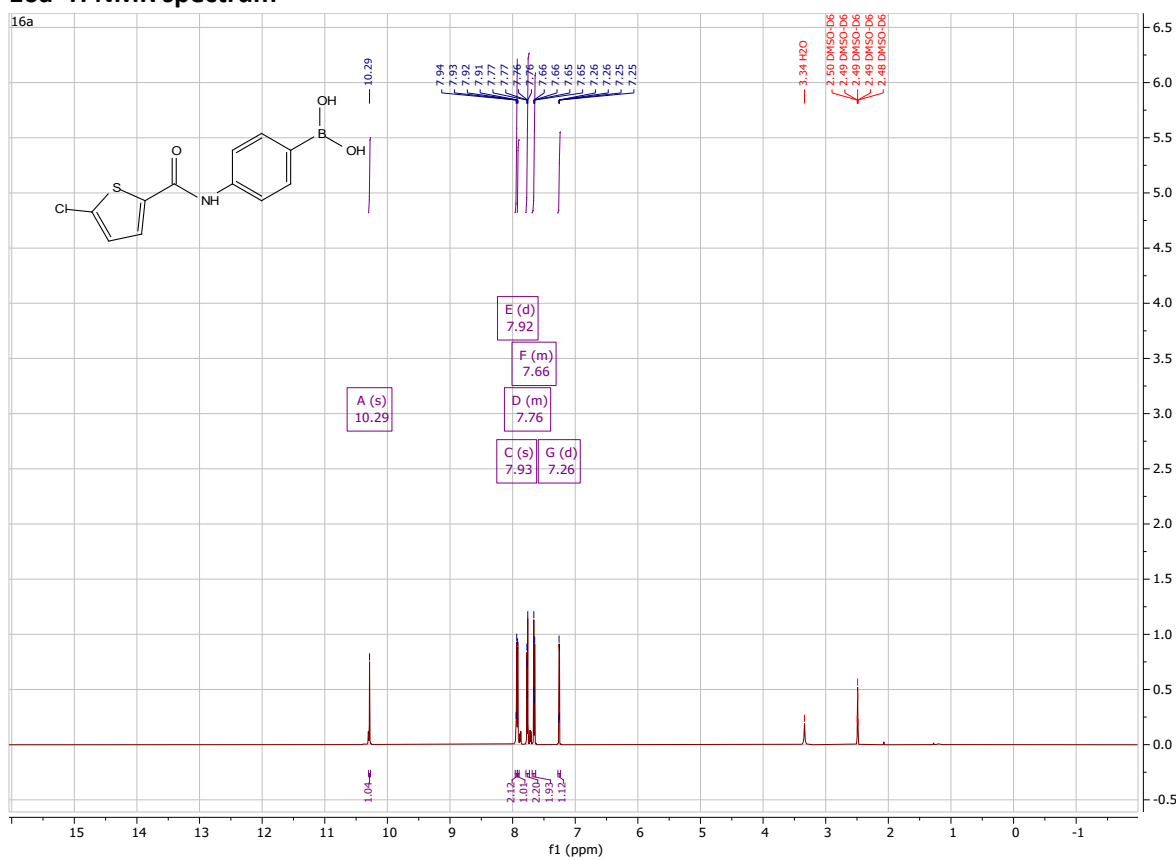

### 16a <sup>13</sup>C NMR spectrum

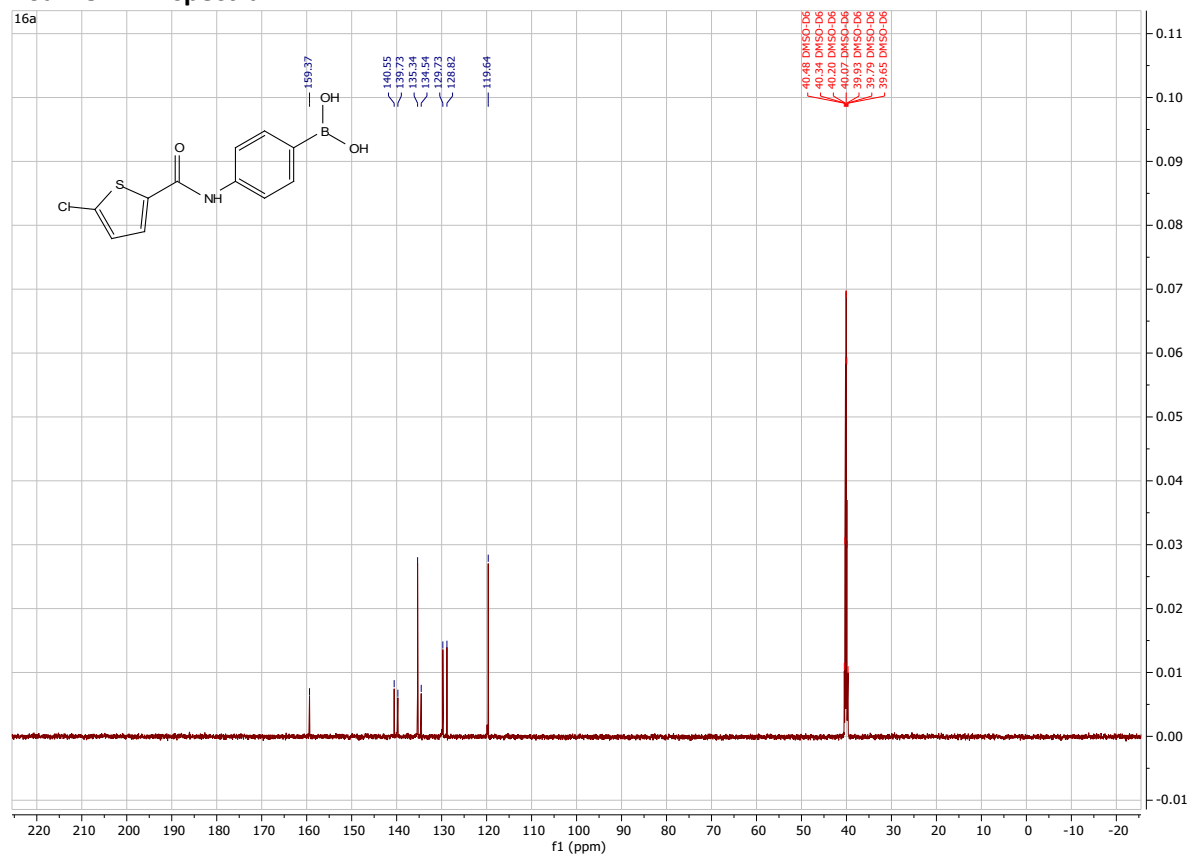

### 16a <sup>11</sup>B NMR spectrum

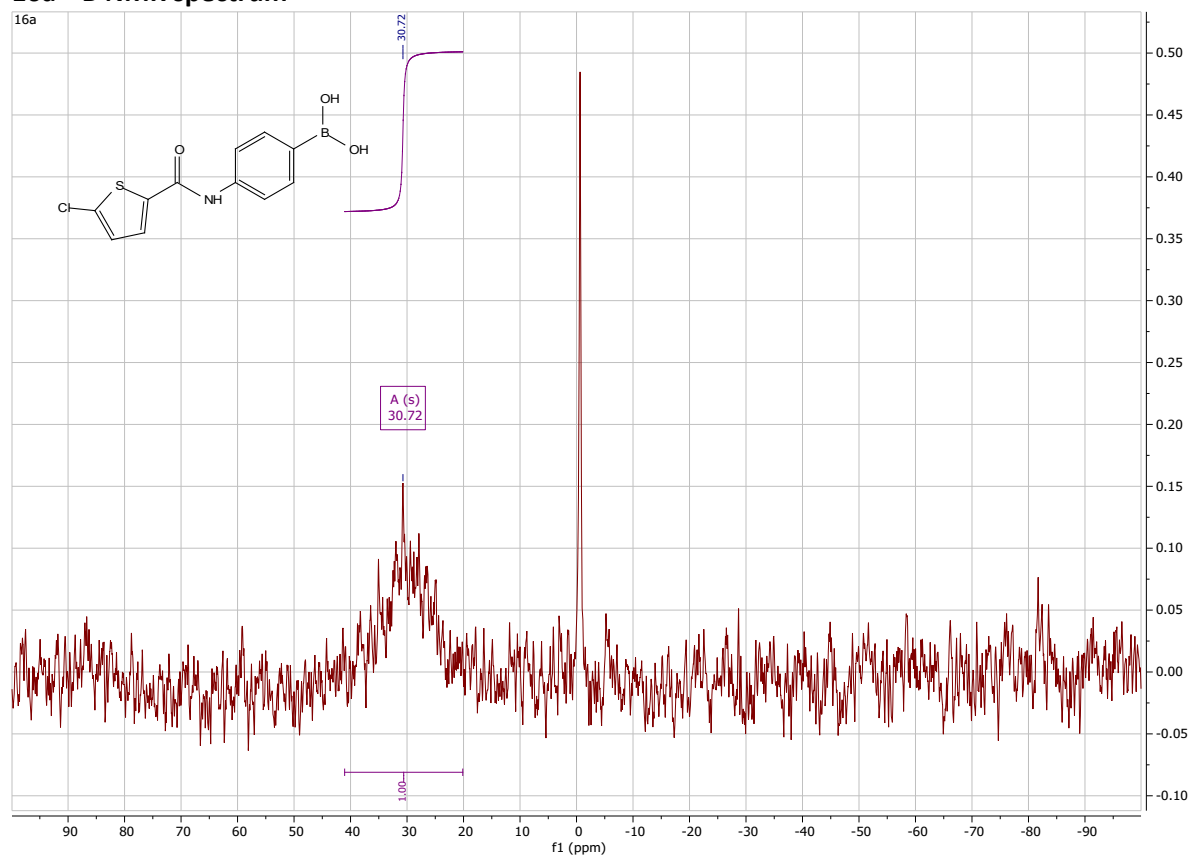

### 17a <sup>1</sup>H NMR spectrum

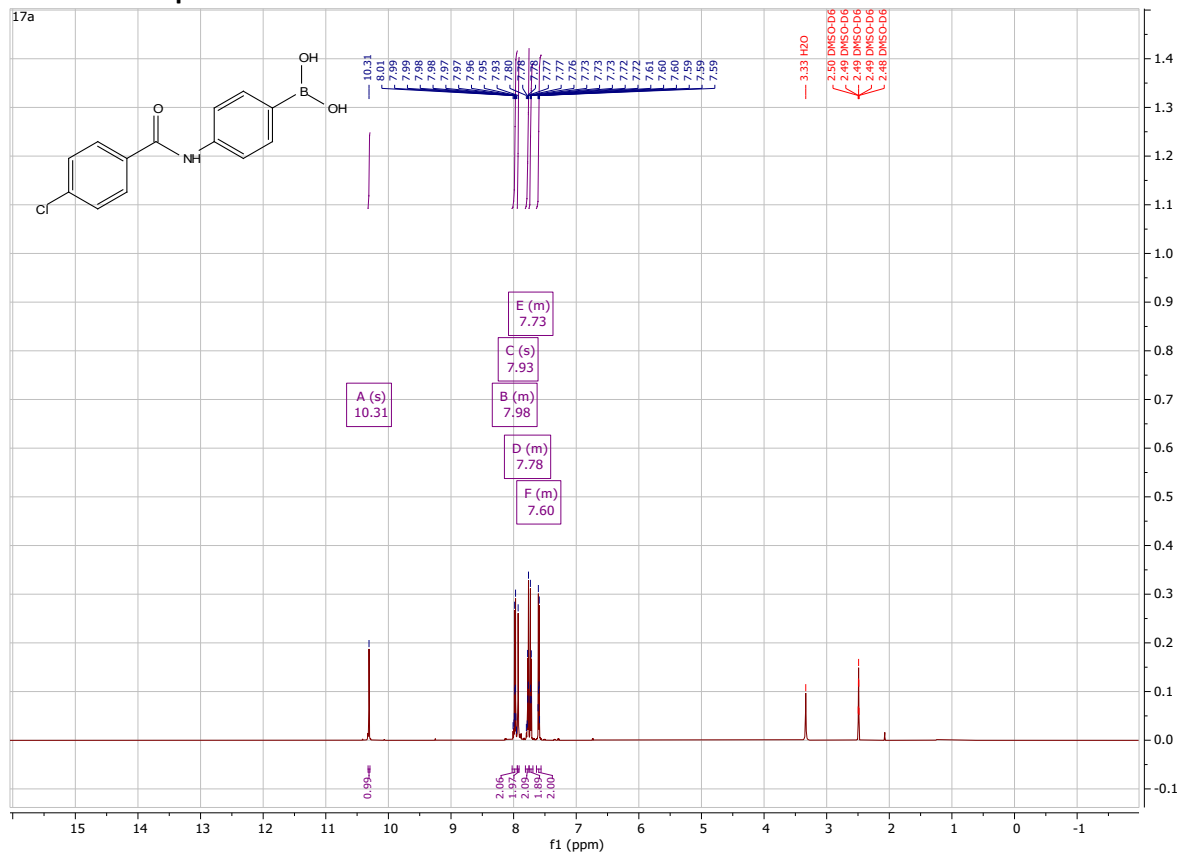

### 17a <sup>13</sup>C NMR spectrum

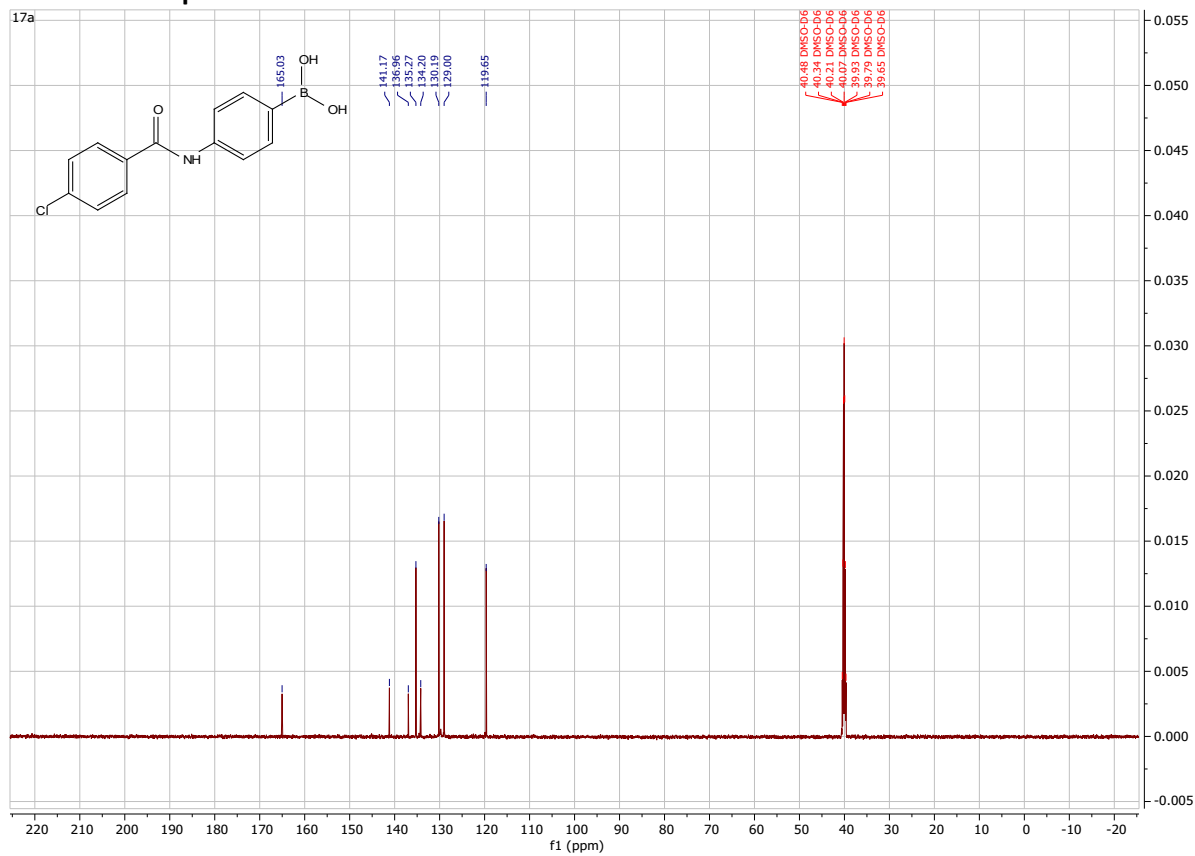

### 17a <sup>11</sup>B NMR spectrum

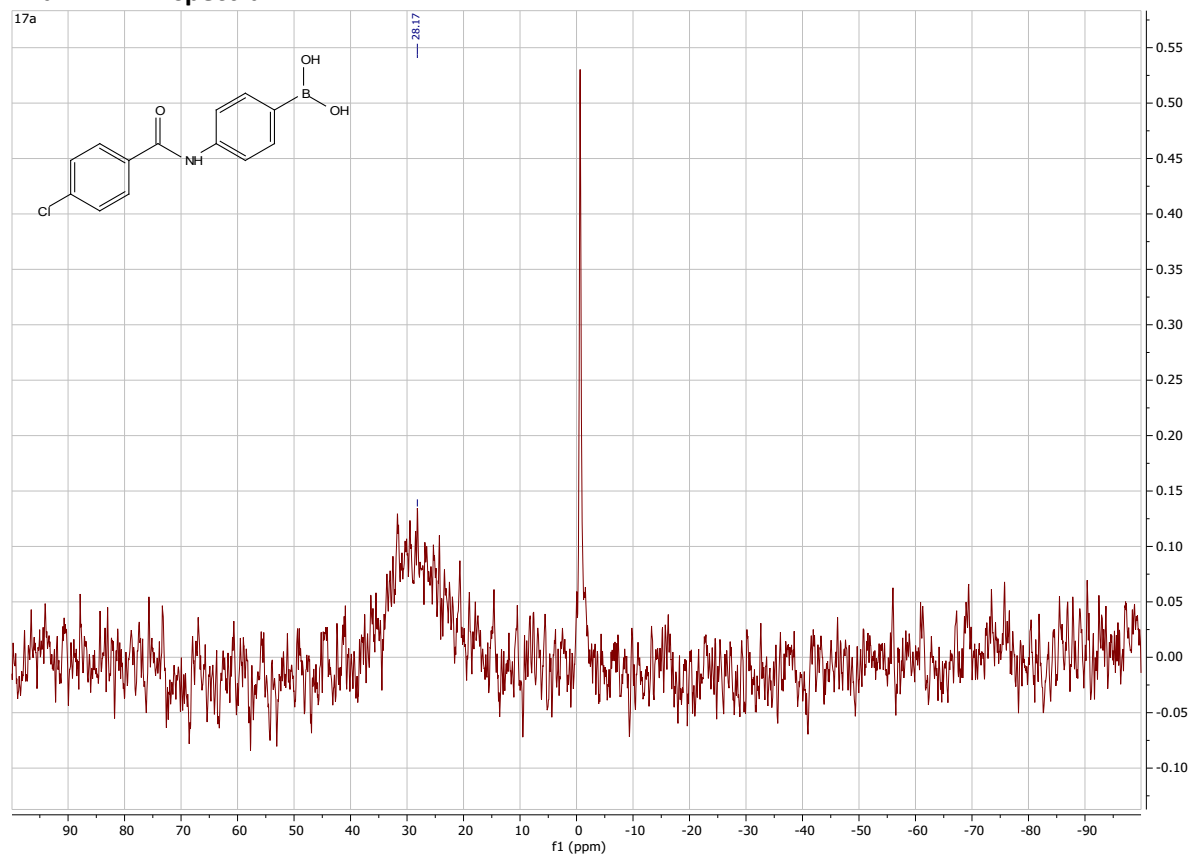

### 18a <sup>1</sup>H NMR spectrum

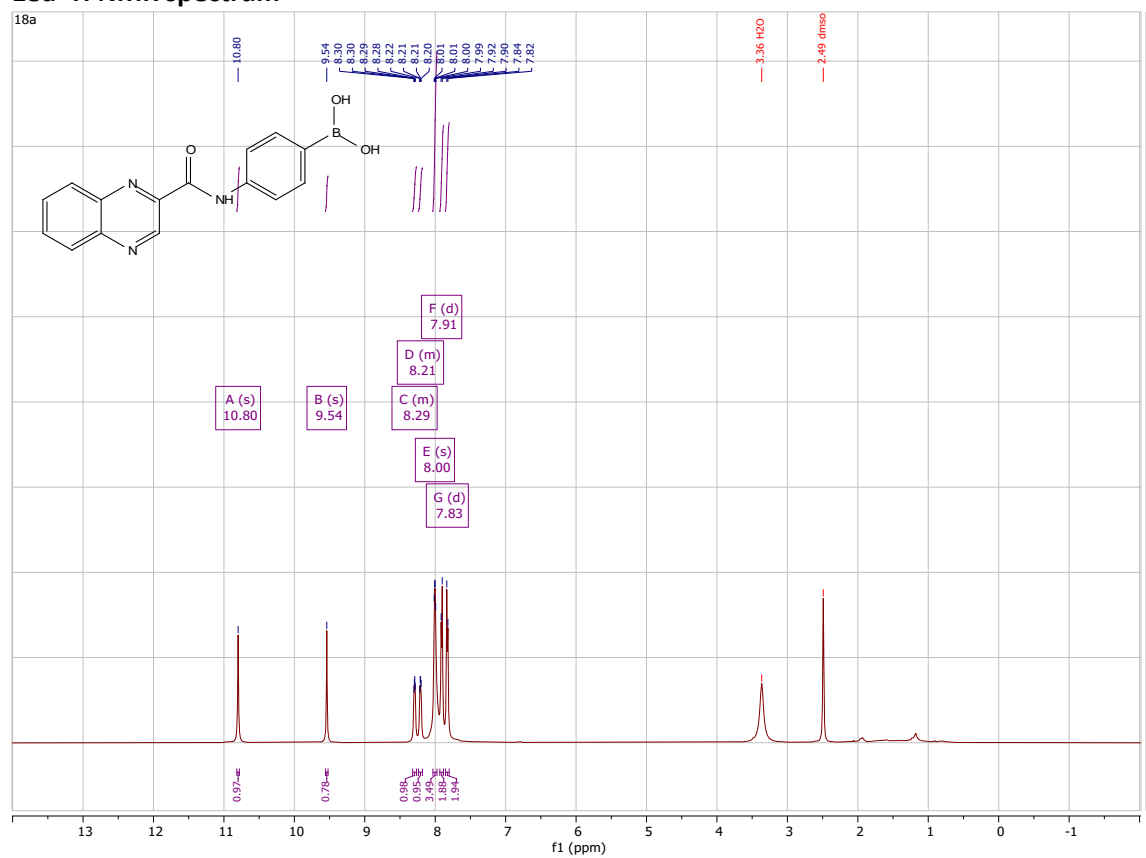





### 19a <sup>1</sup>H NMR spectrum

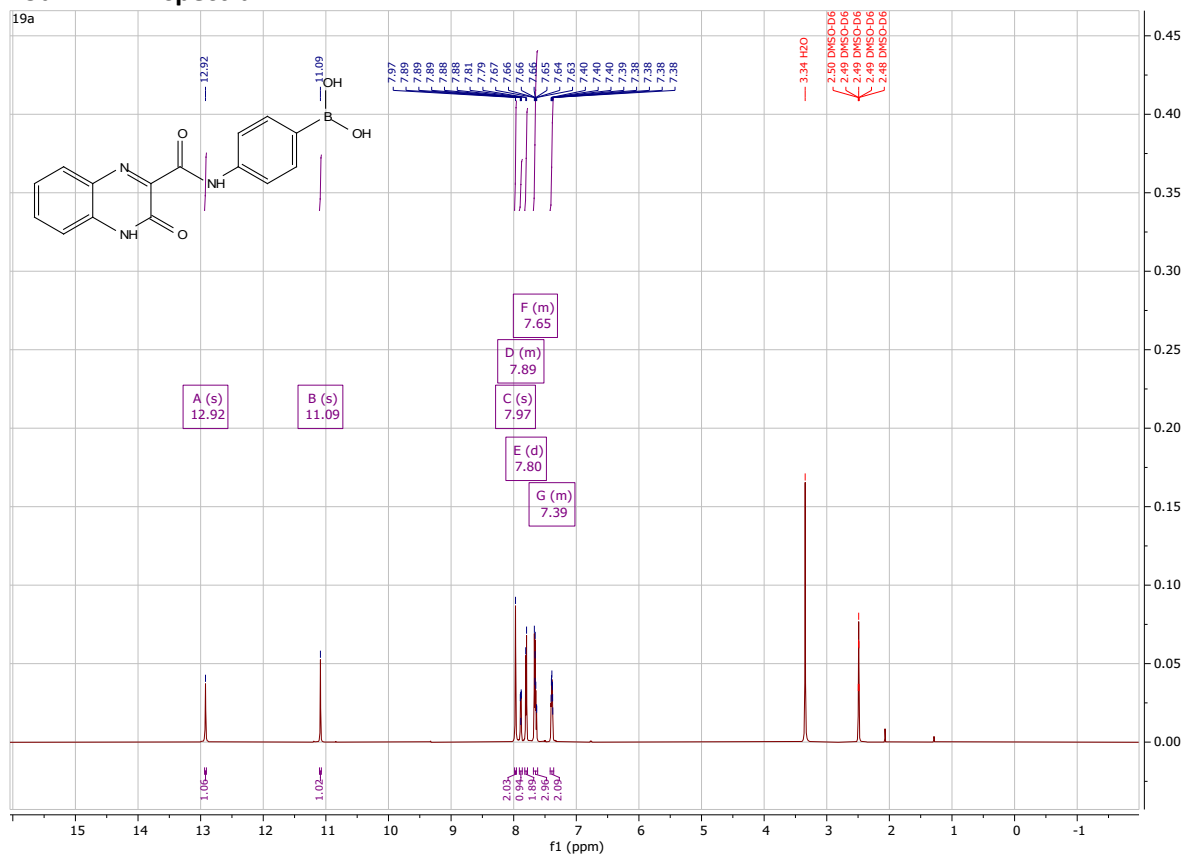

### 19a <sup>13</sup>C NMR spectrum

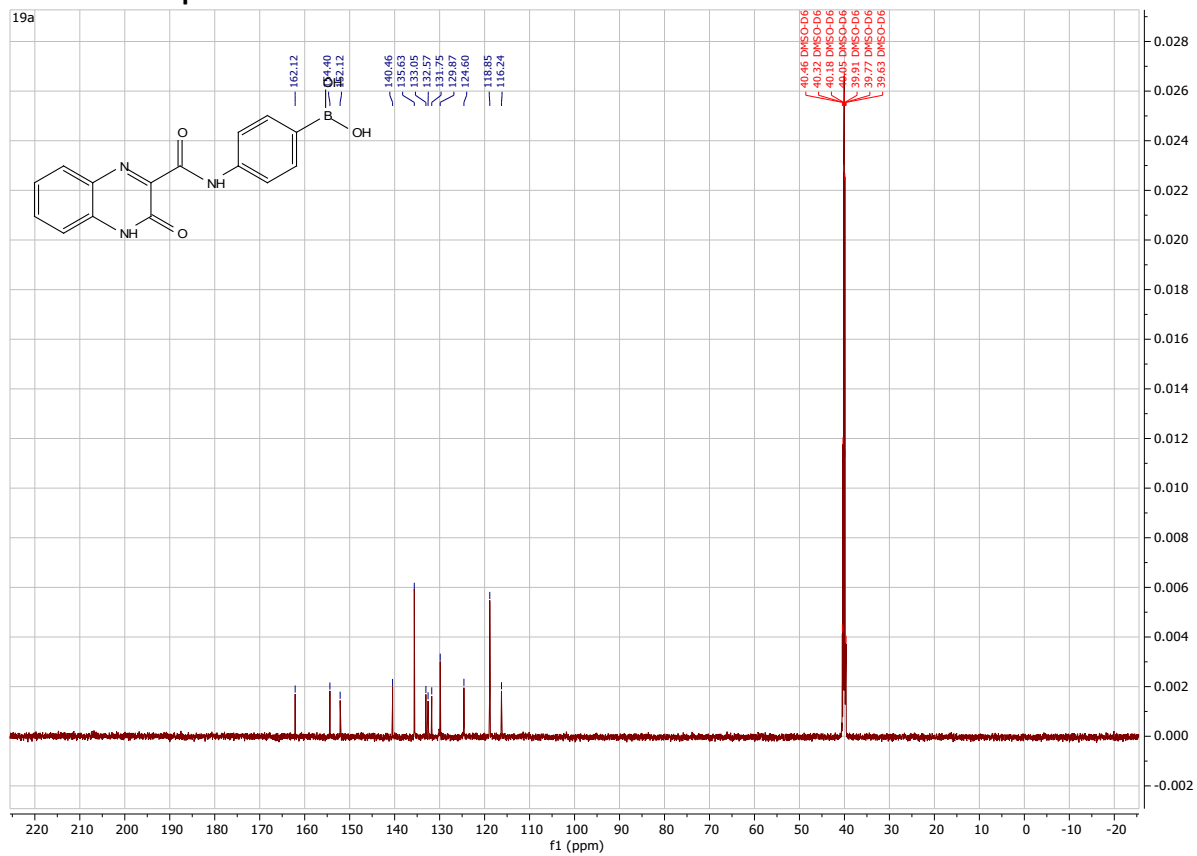

### 19 <sup>11</sup>B NMR spectrum

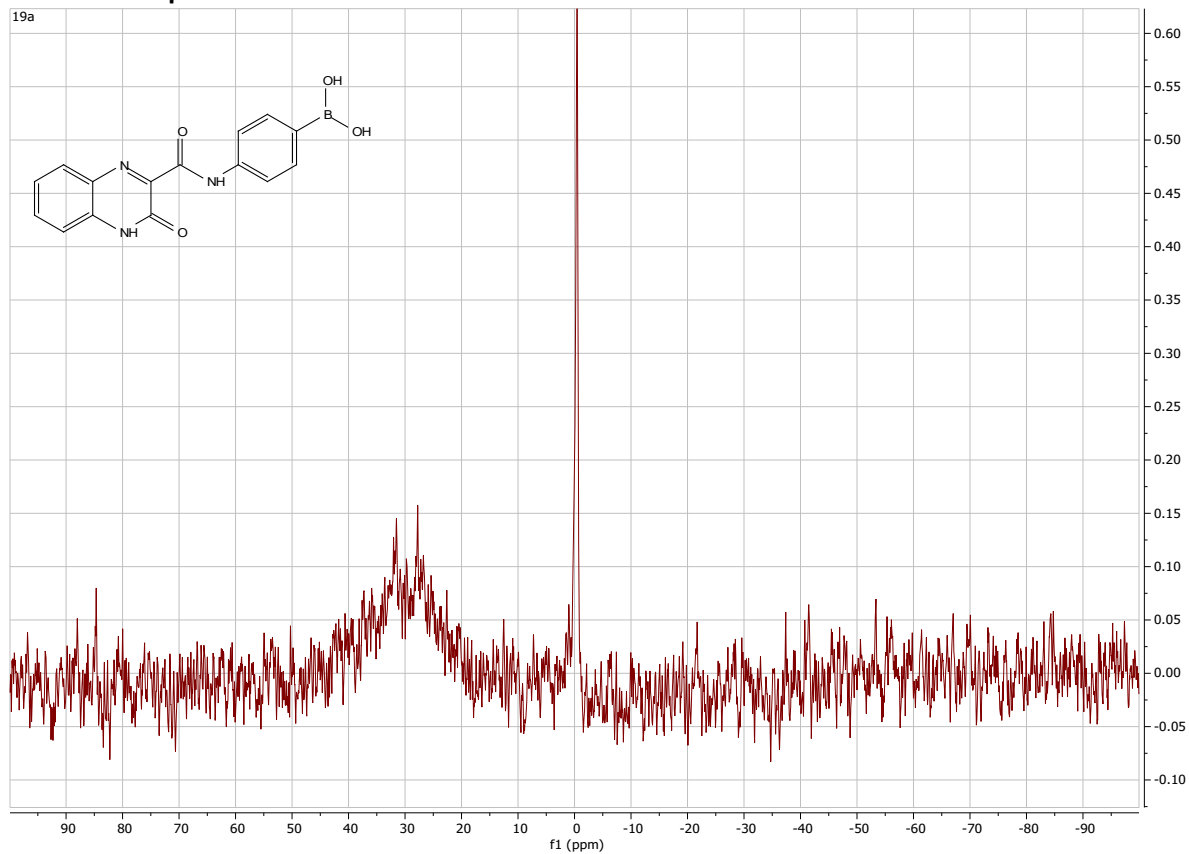

### 20a <sup>1</sup>H NMR spectrum

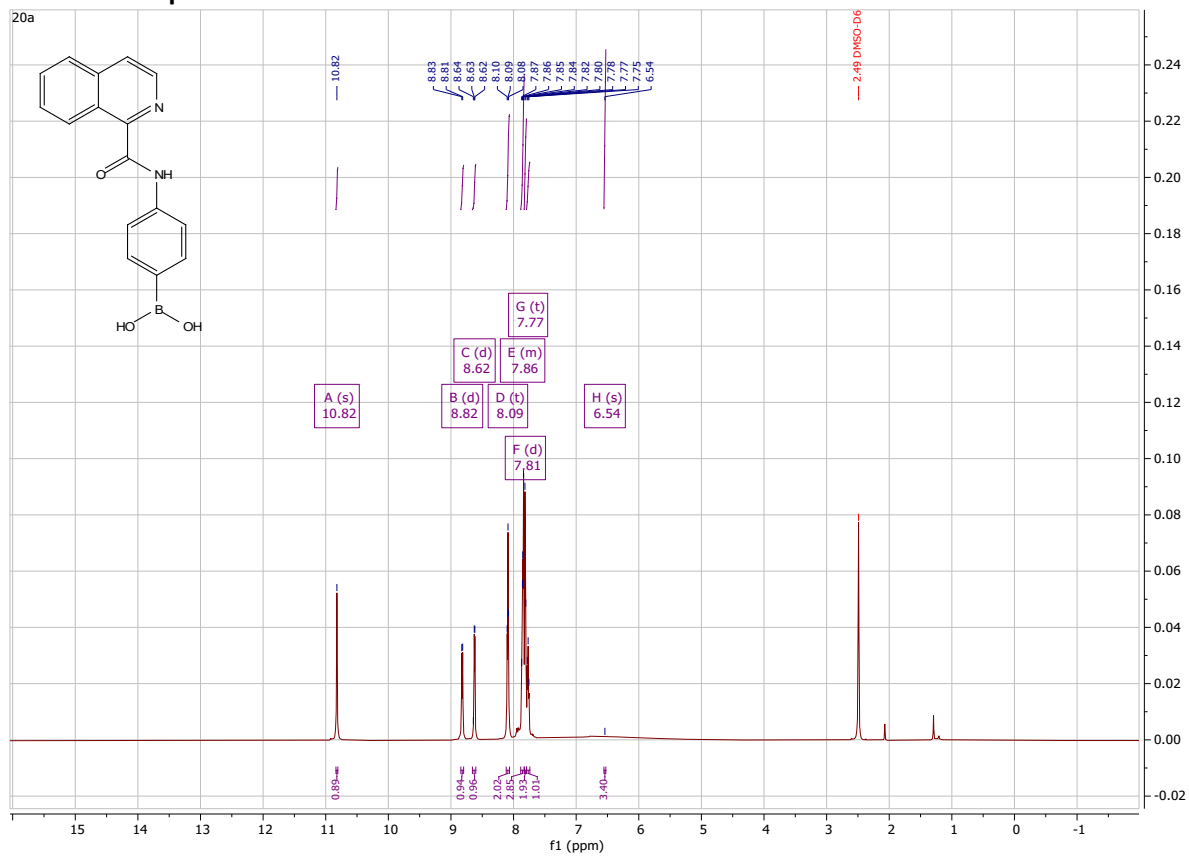

## 20a <sup>13</sup>C NMR spectrum

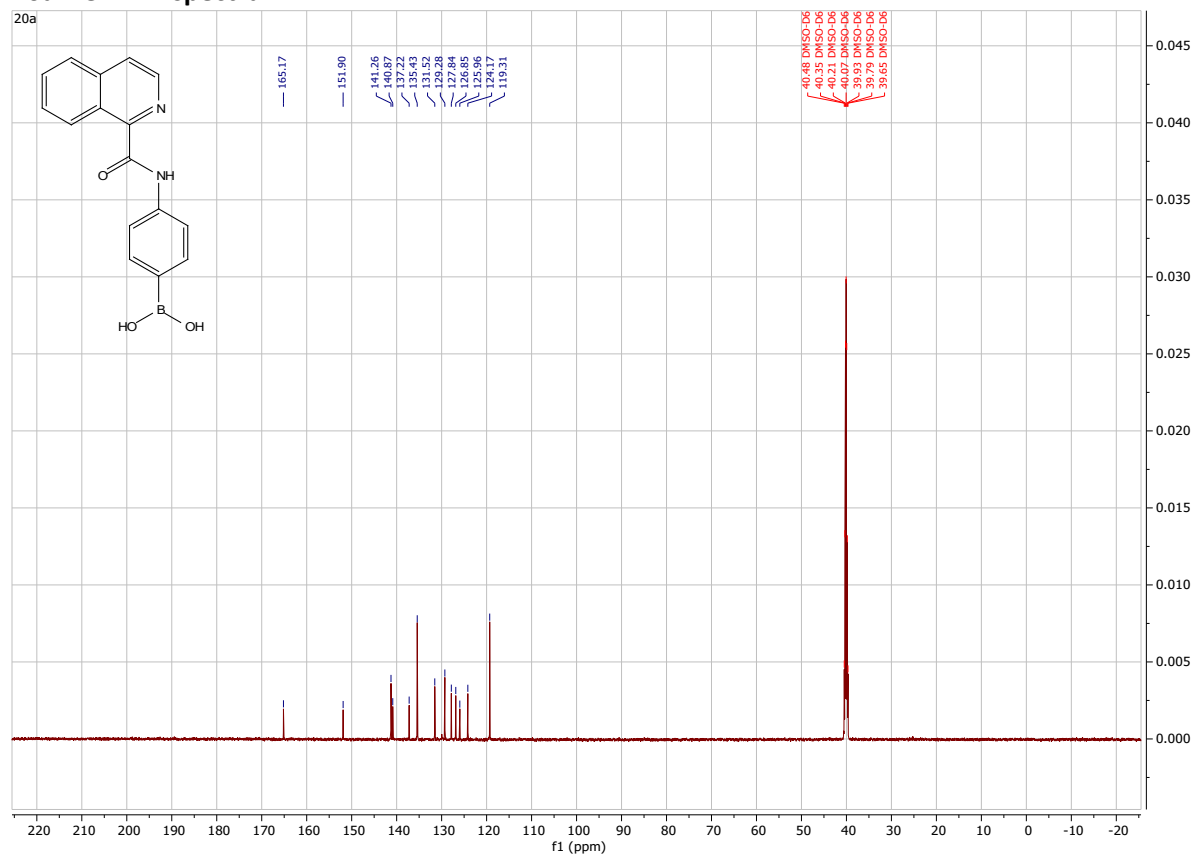

## 20a <sup>11</sup>B NMR spectrum

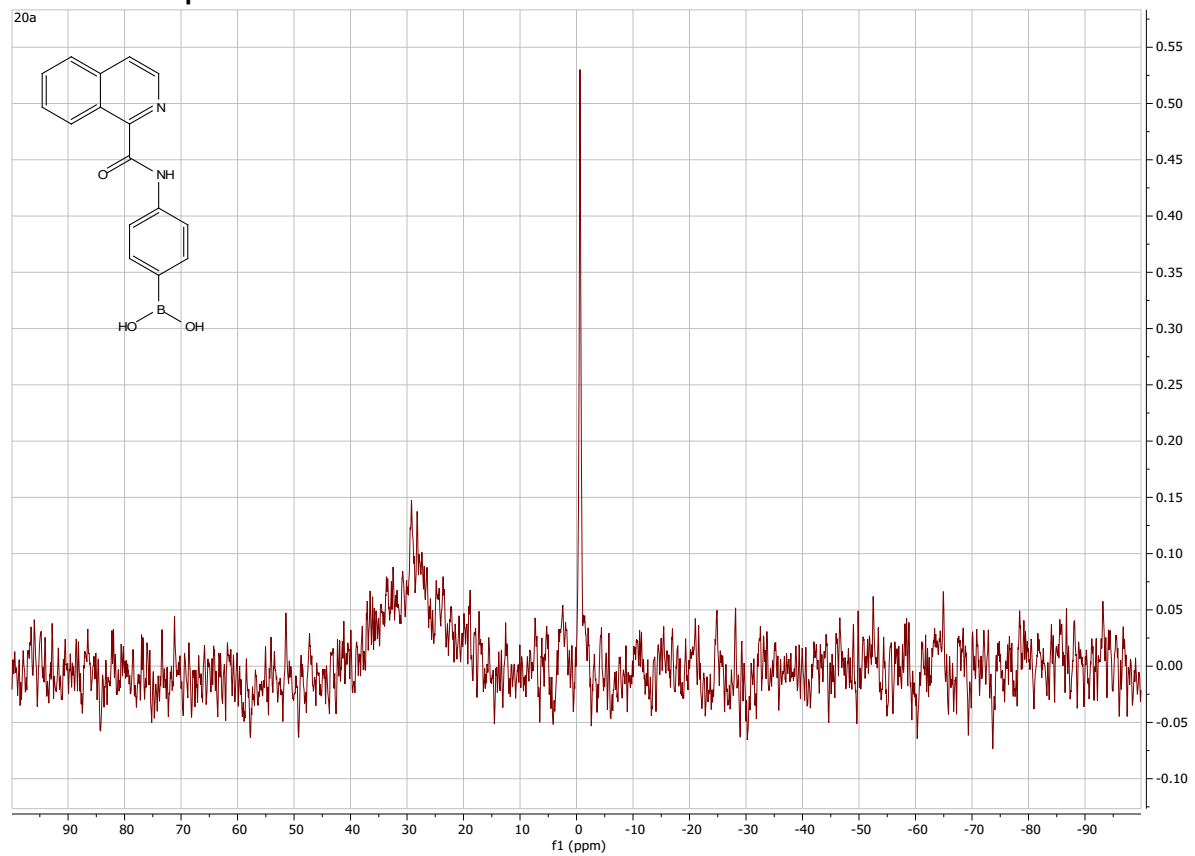

### 1b <sup>1</sup>H NMR spectrum

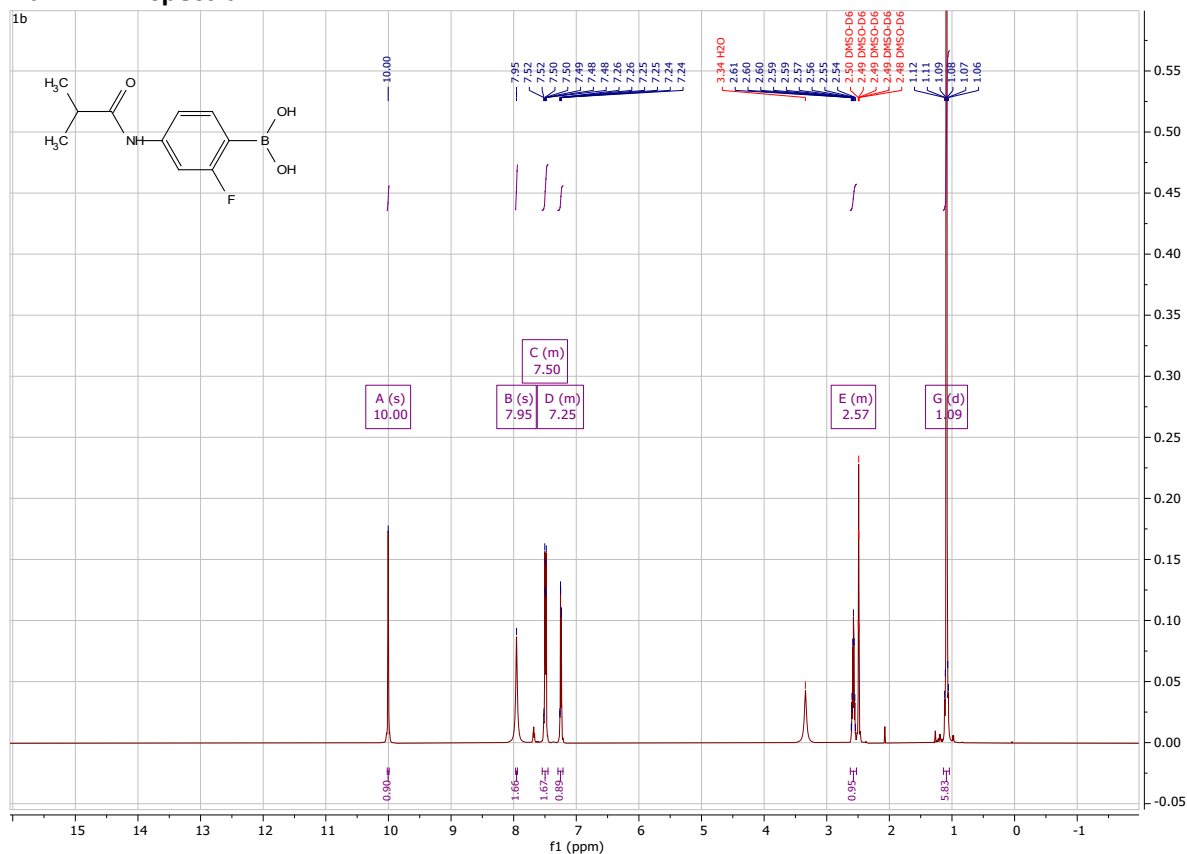

### 1b <sup>13</sup>C NMR spectrum

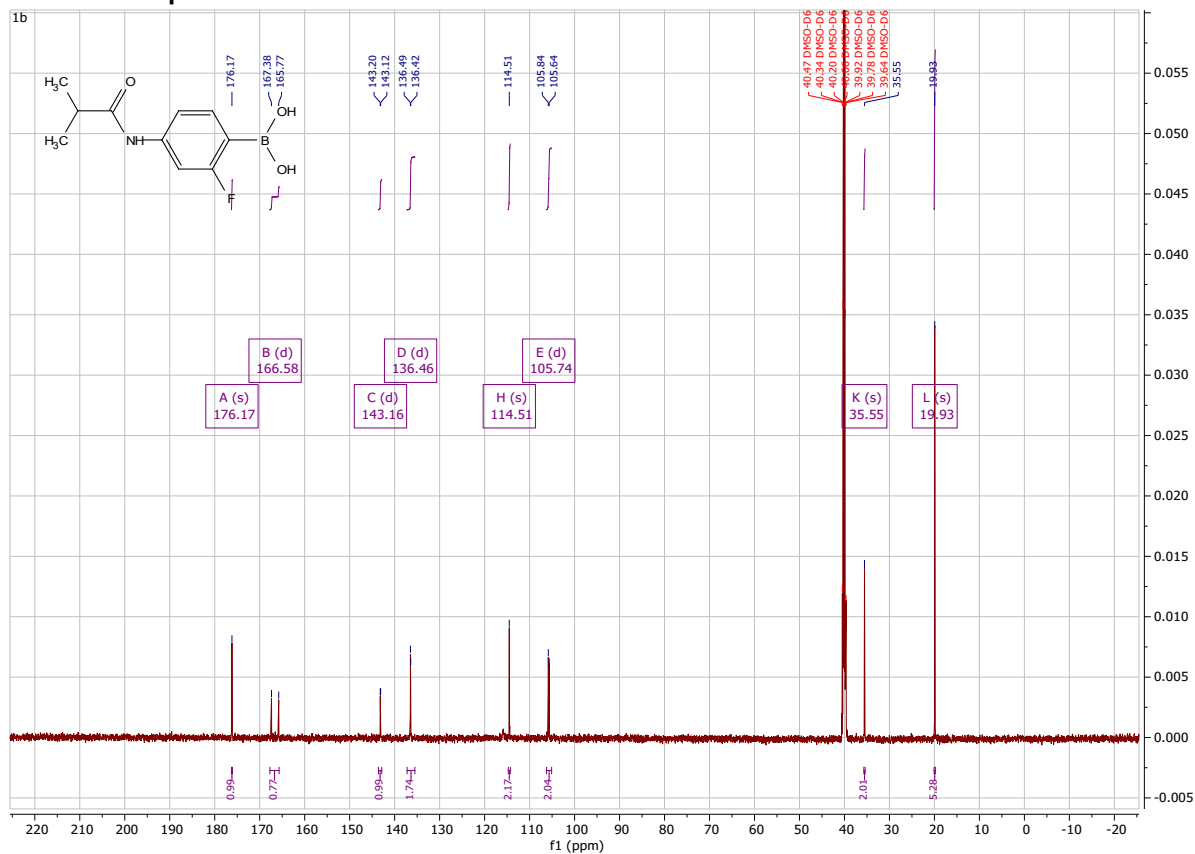

### 1b <sup>11</sup>B NMR spectrum

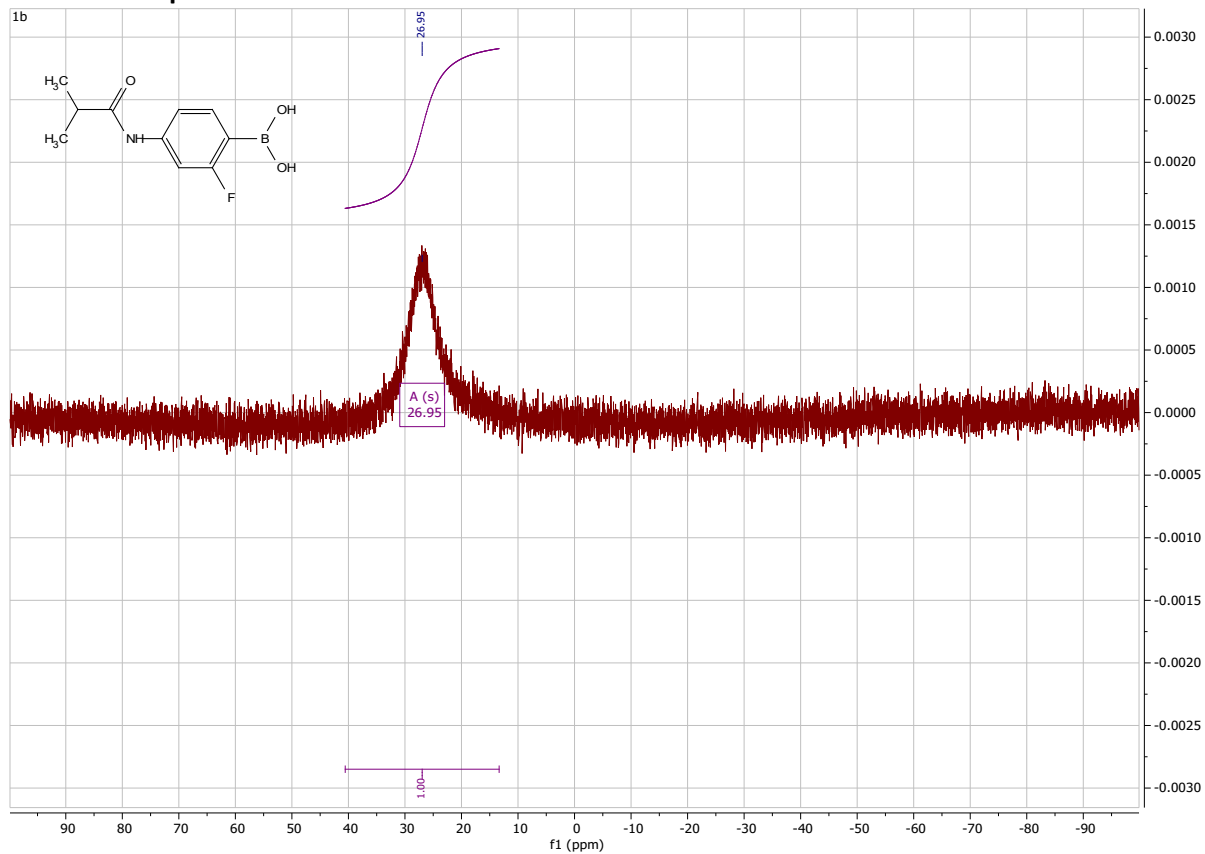

### 2b <sup>1</sup>H NMR spectrum

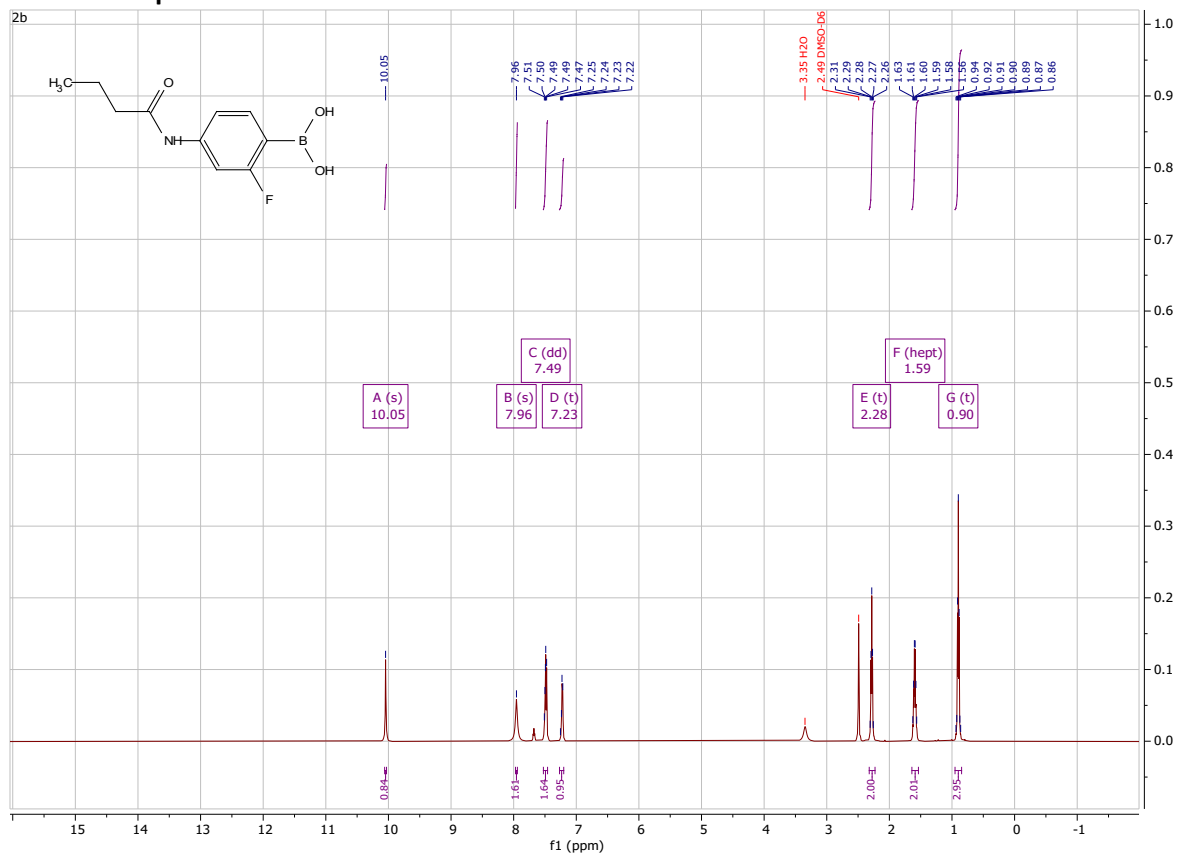

## 2b <sup>13</sup>C NMR spectrum

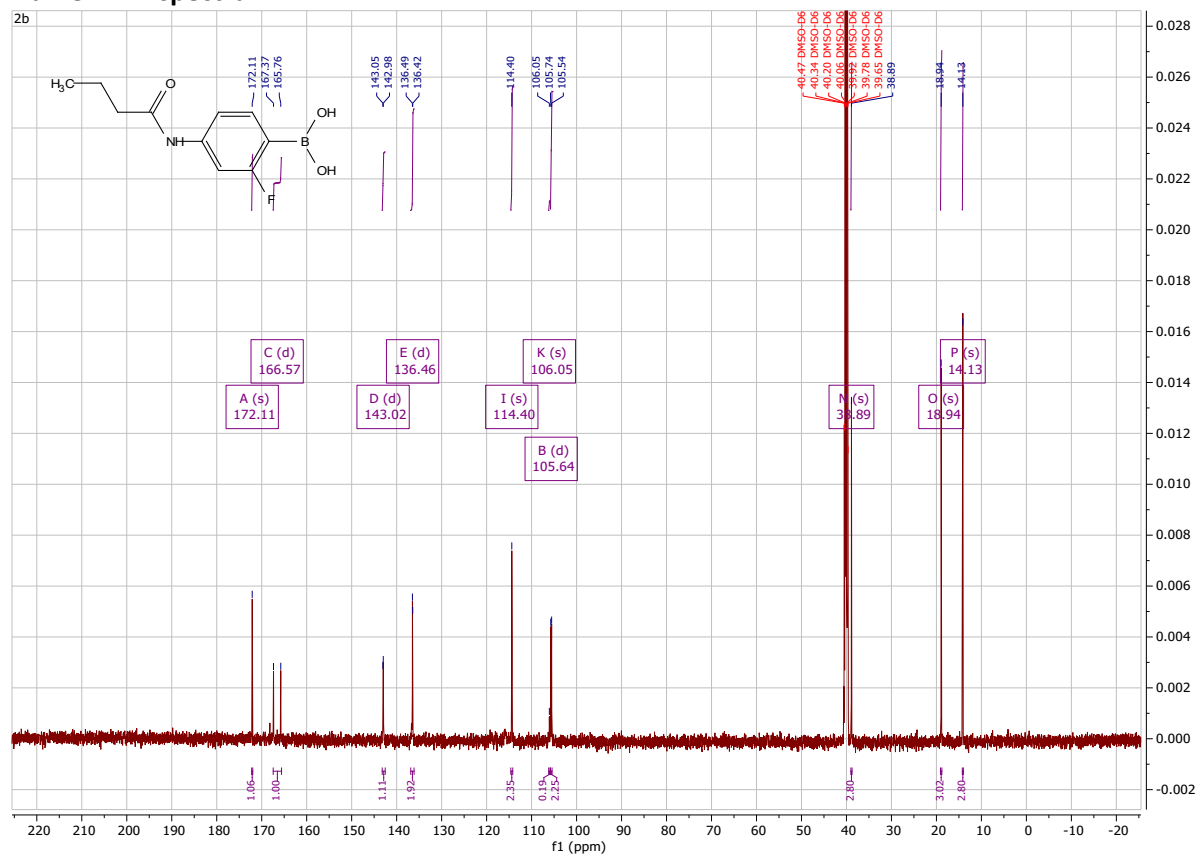

## 2b <sup>11</sup>B NMR spectrum

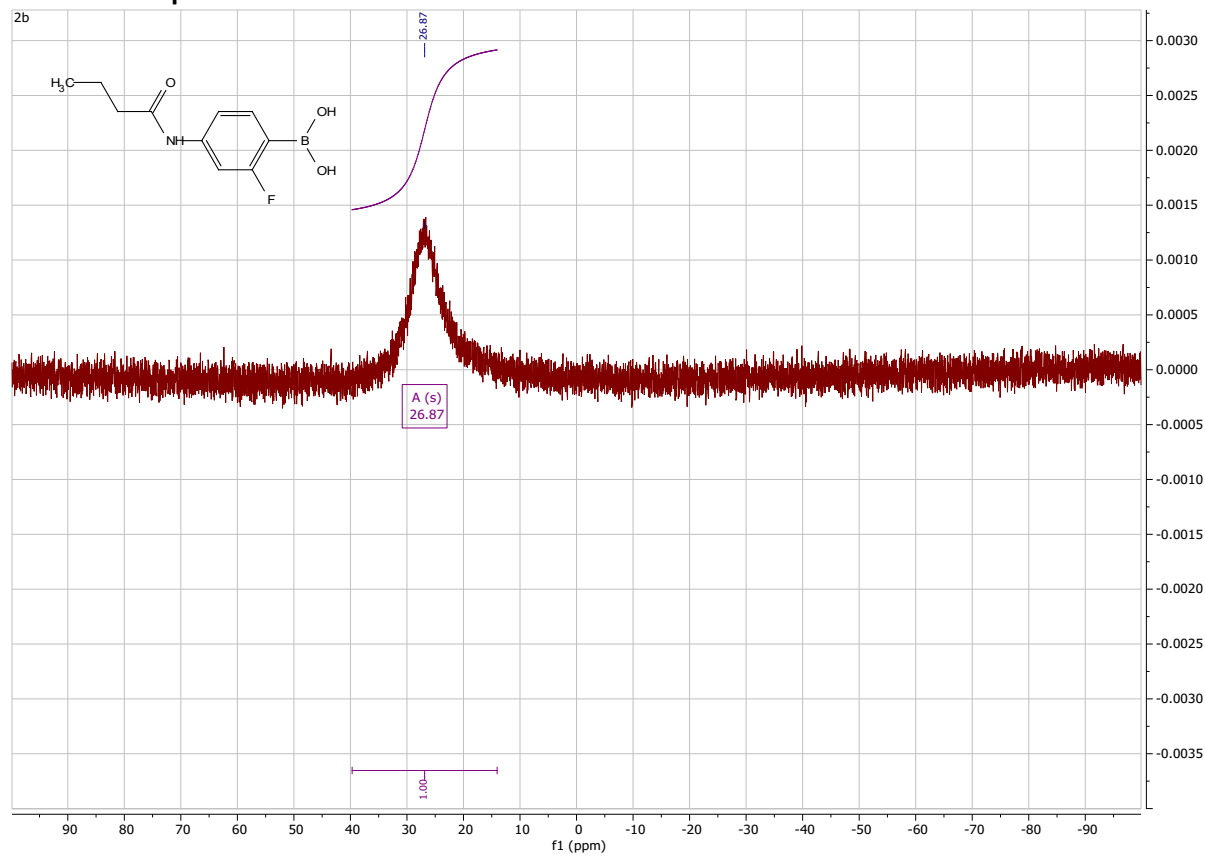







### 4b <sup>13</sup>C NMR spectrum

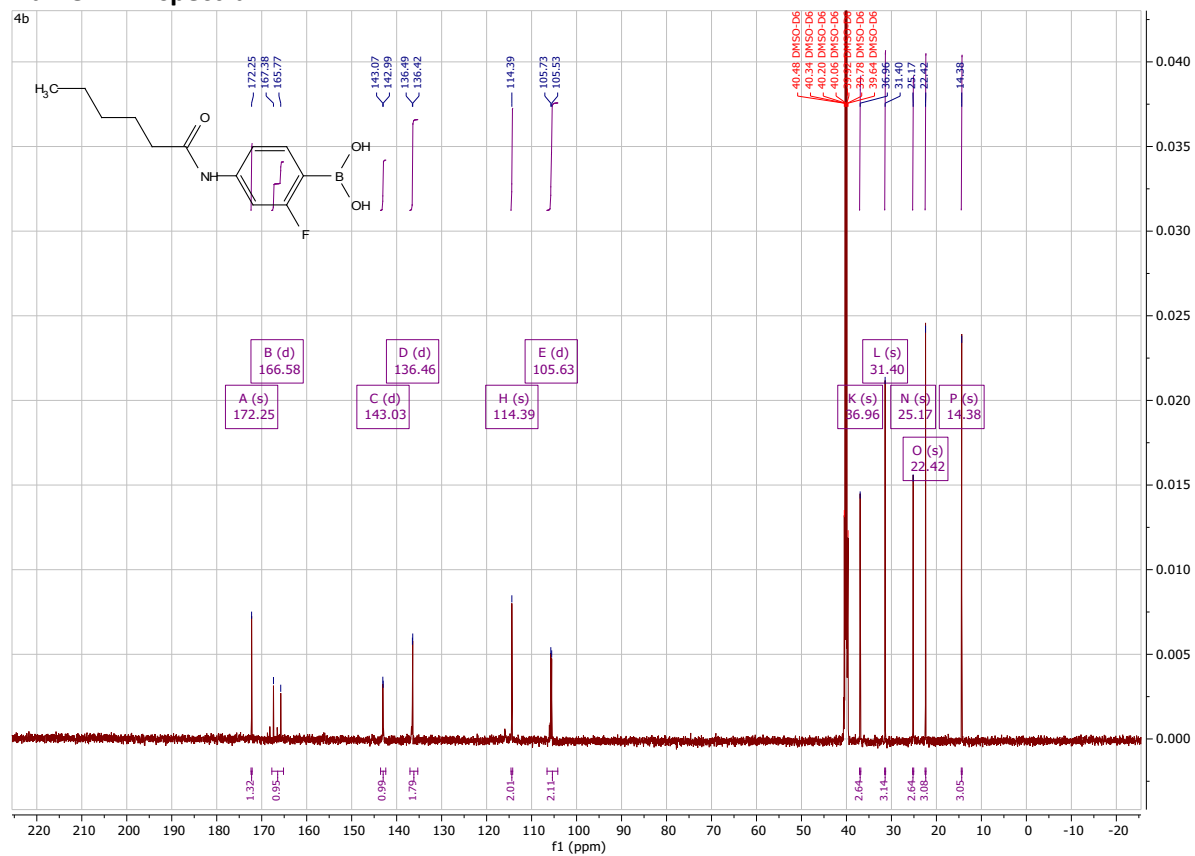

### 4b <sup>11</sup>B NMR spectrum

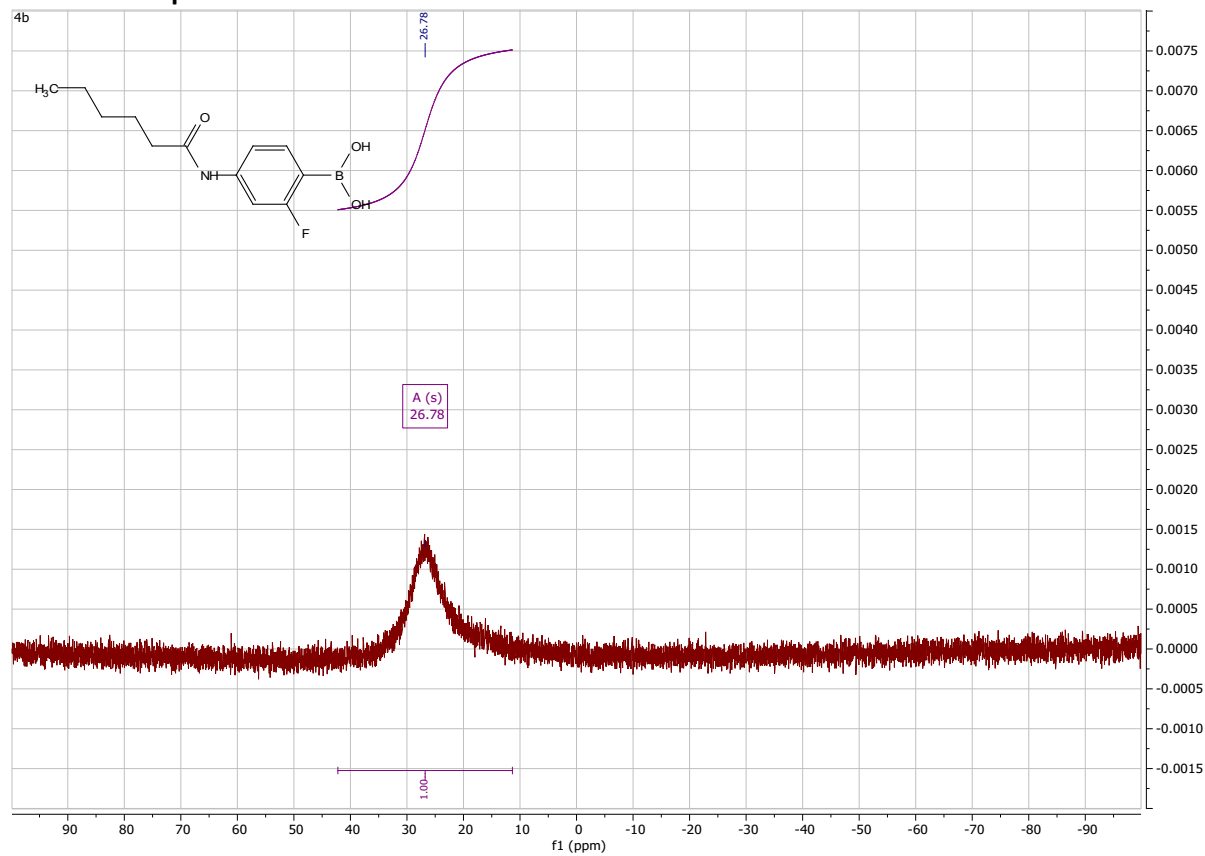

### 5b <sup>1</sup>H NMR spectrum

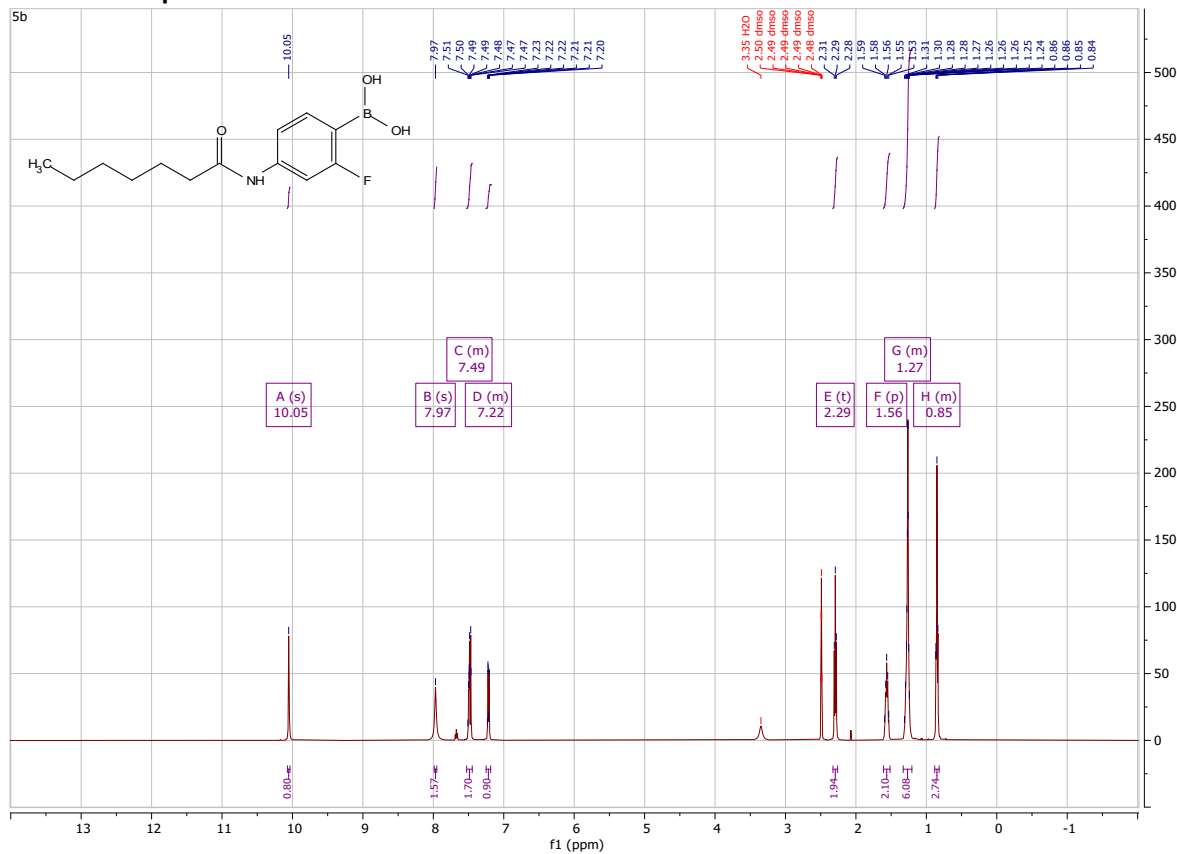

### 5b <sup>13</sup>C NMR spectrum

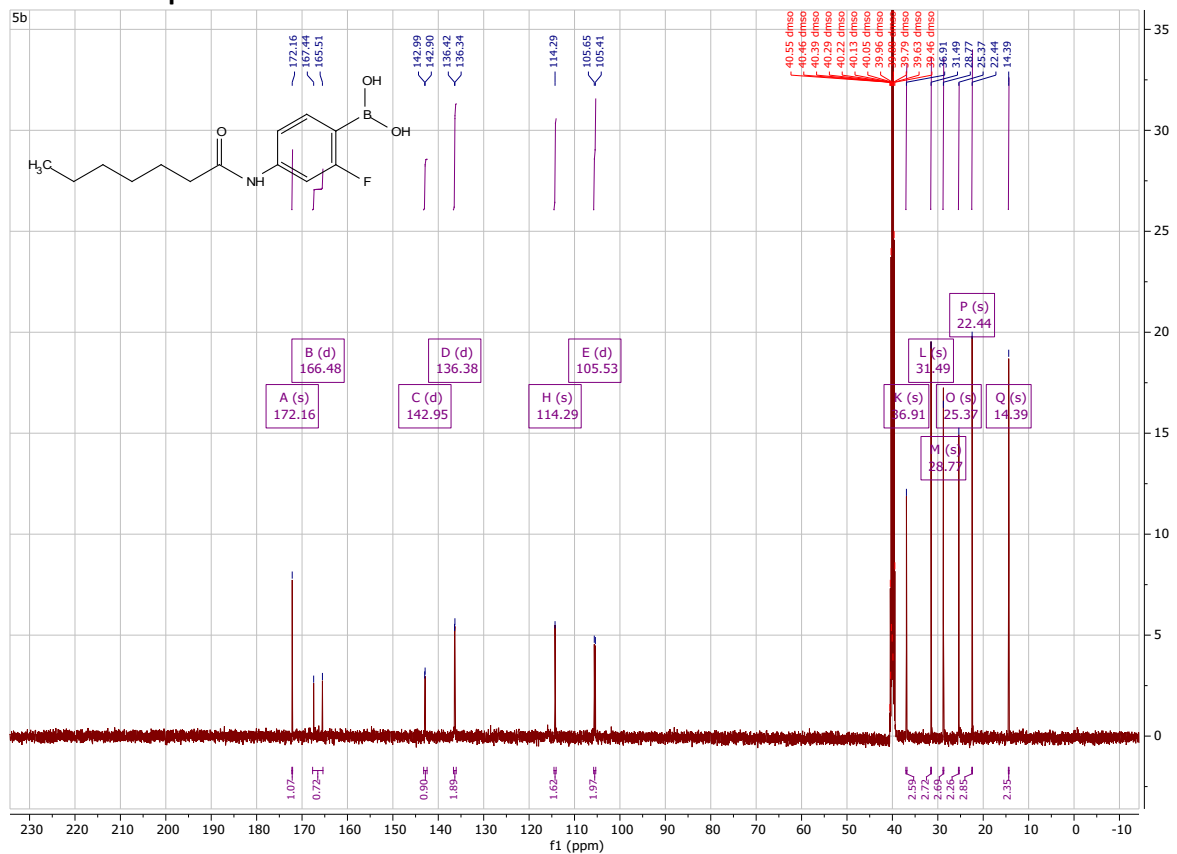

### 5b <sup>11</sup>B NMR spectrum

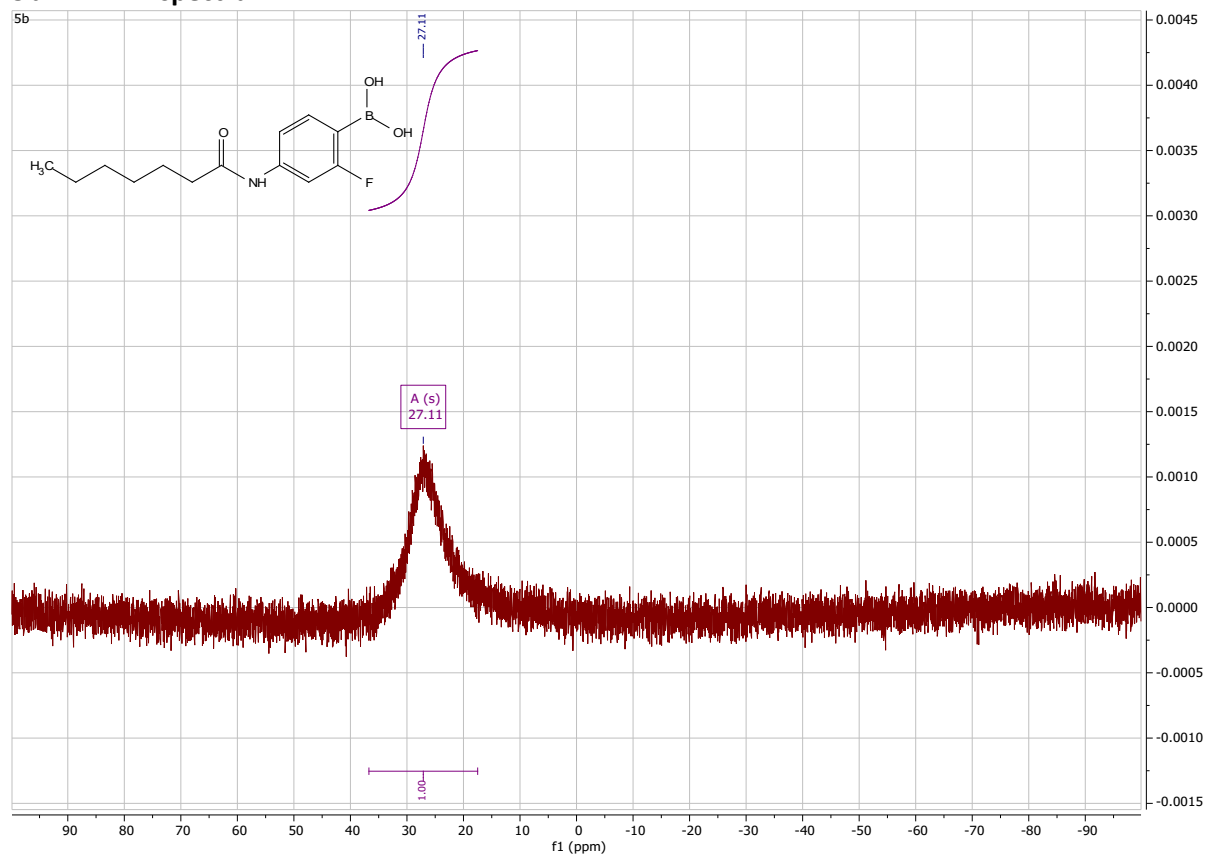

### 6b <sup>1</sup>H NMR spectrum

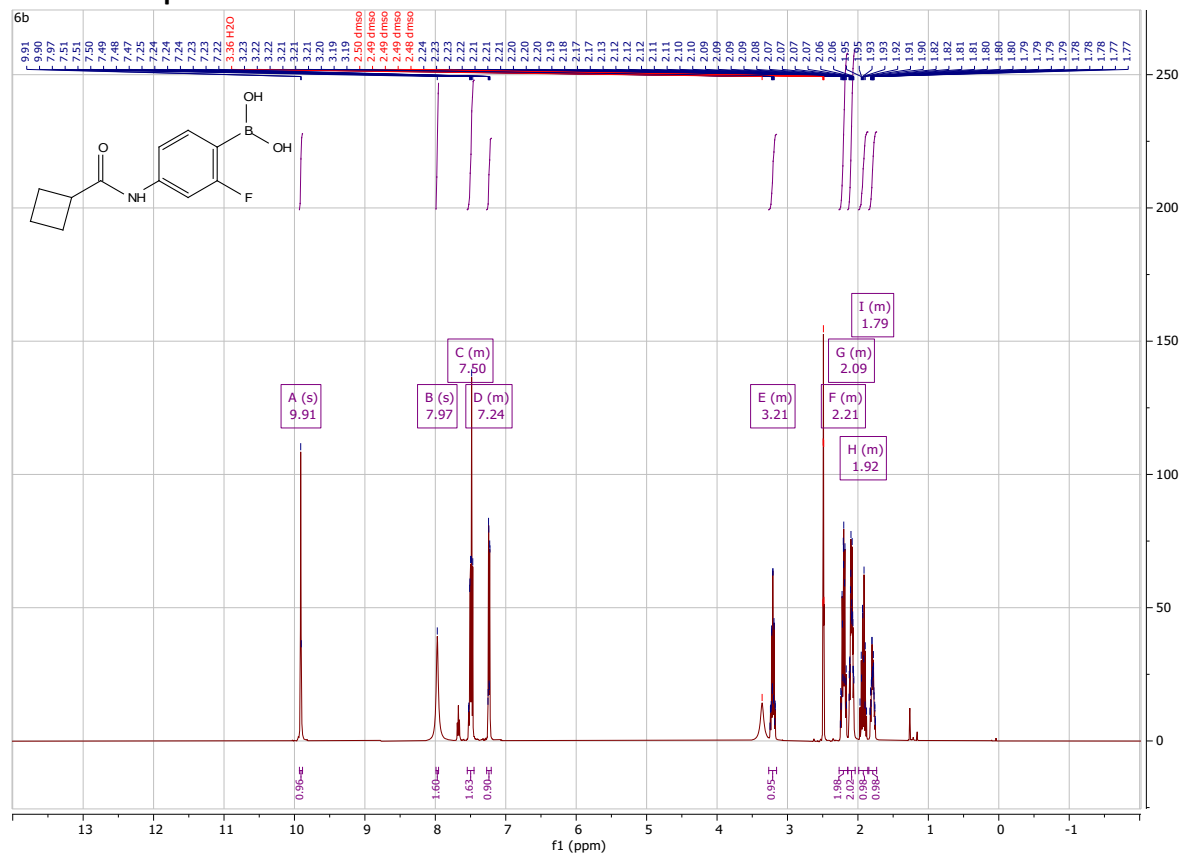

### 6b <sup>13</sup>C NMR spectrum

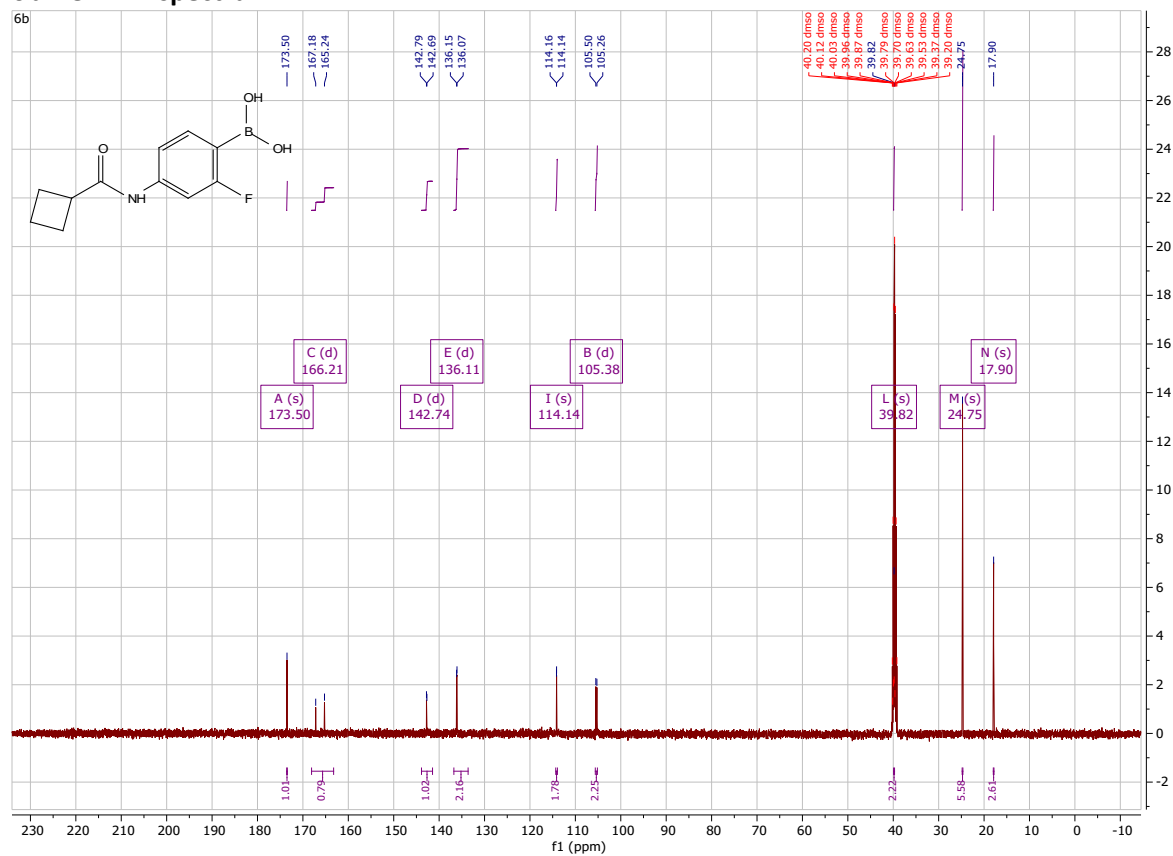

### 6b <sup>11</sup>B NMR spectrum

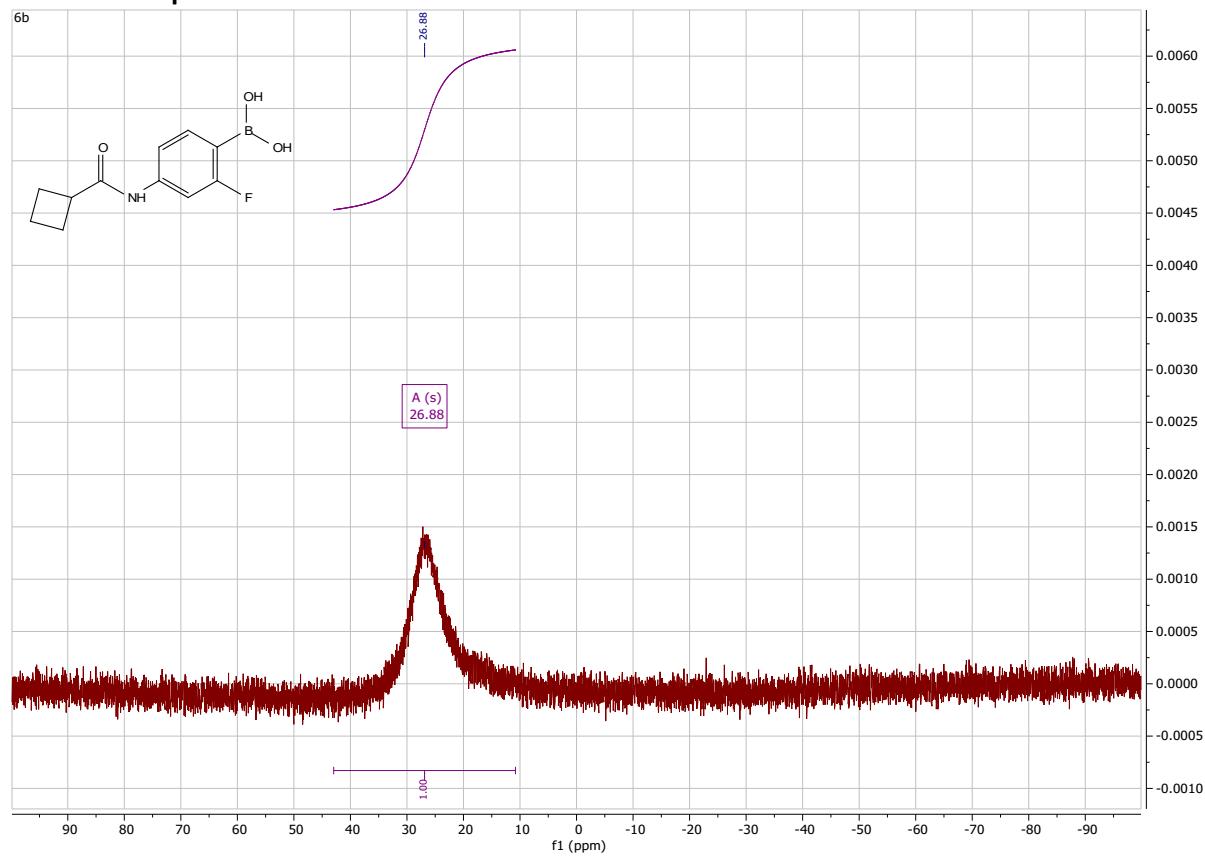

### 7b <sup>1</sup>H NMR spectrum

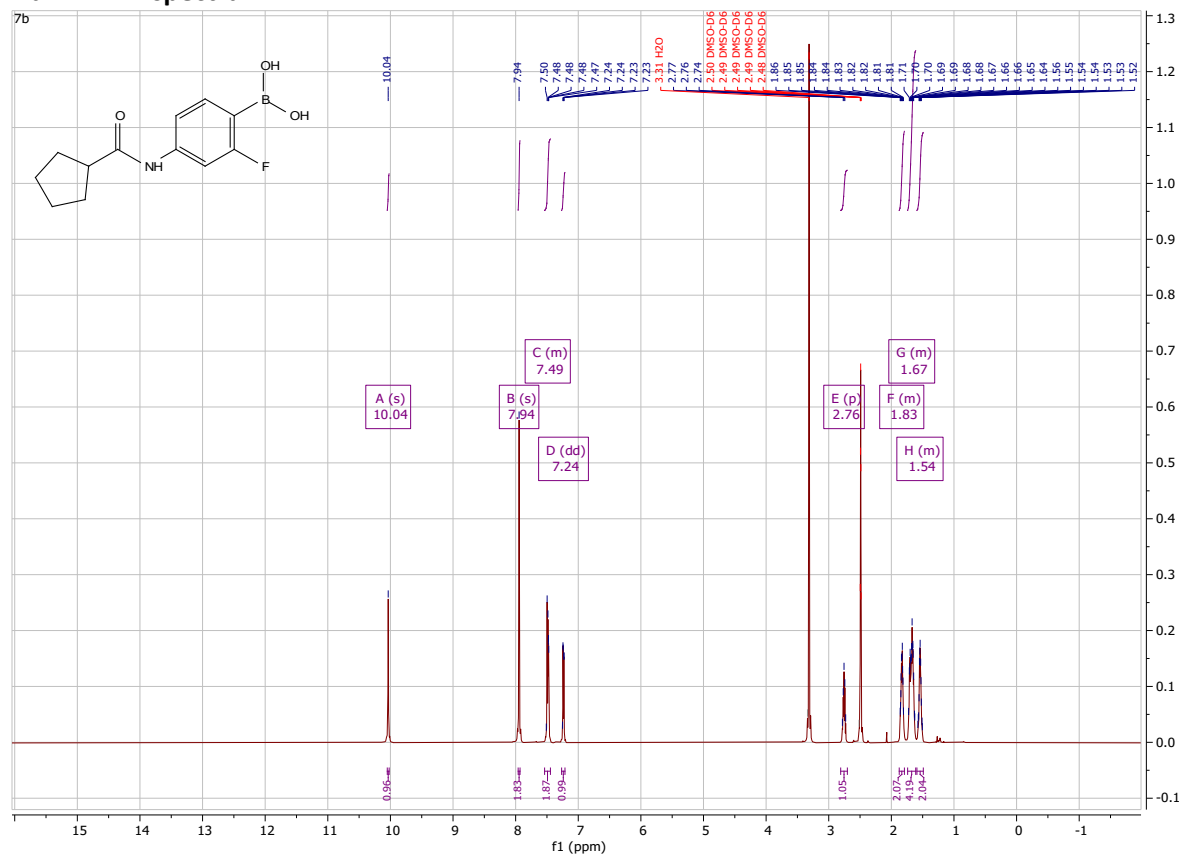

### 7b <sup>13</sup>C NMR spectrum

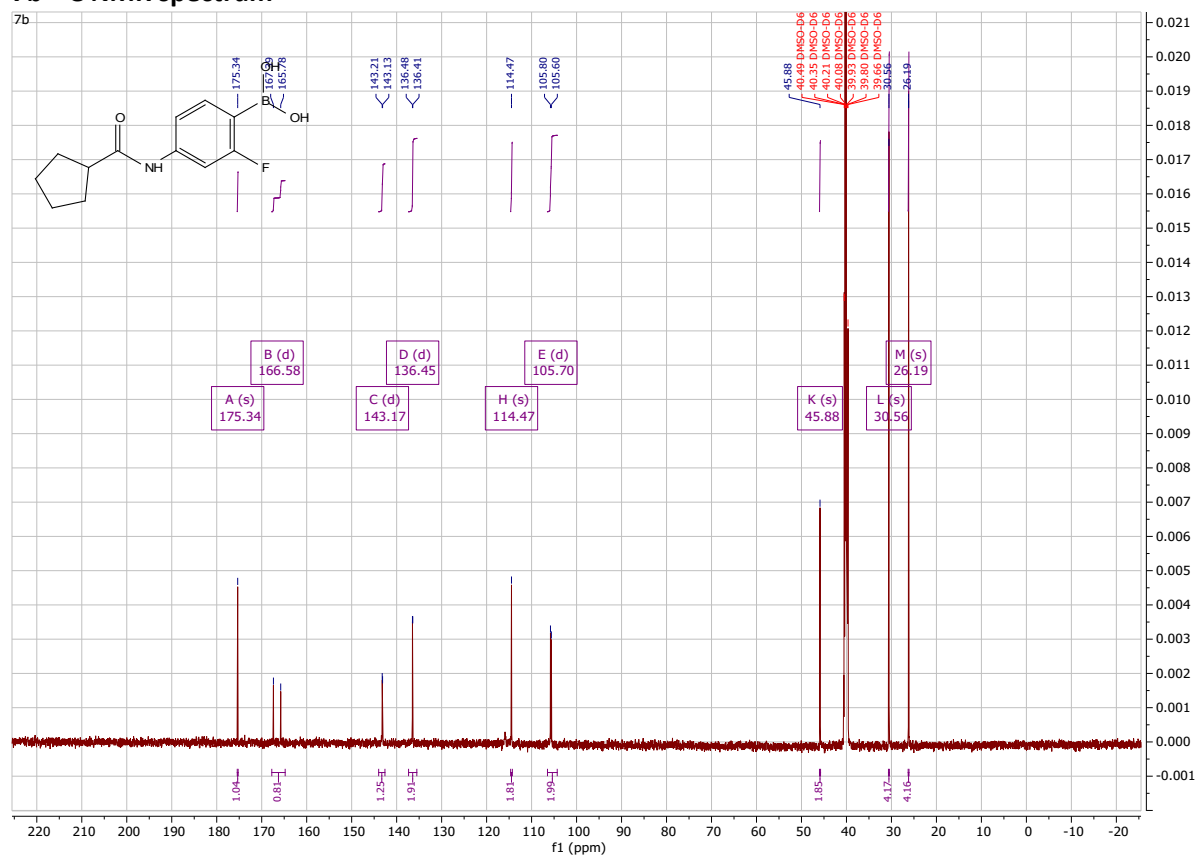

### 7b <sup>11</sup>B NMR spectrum

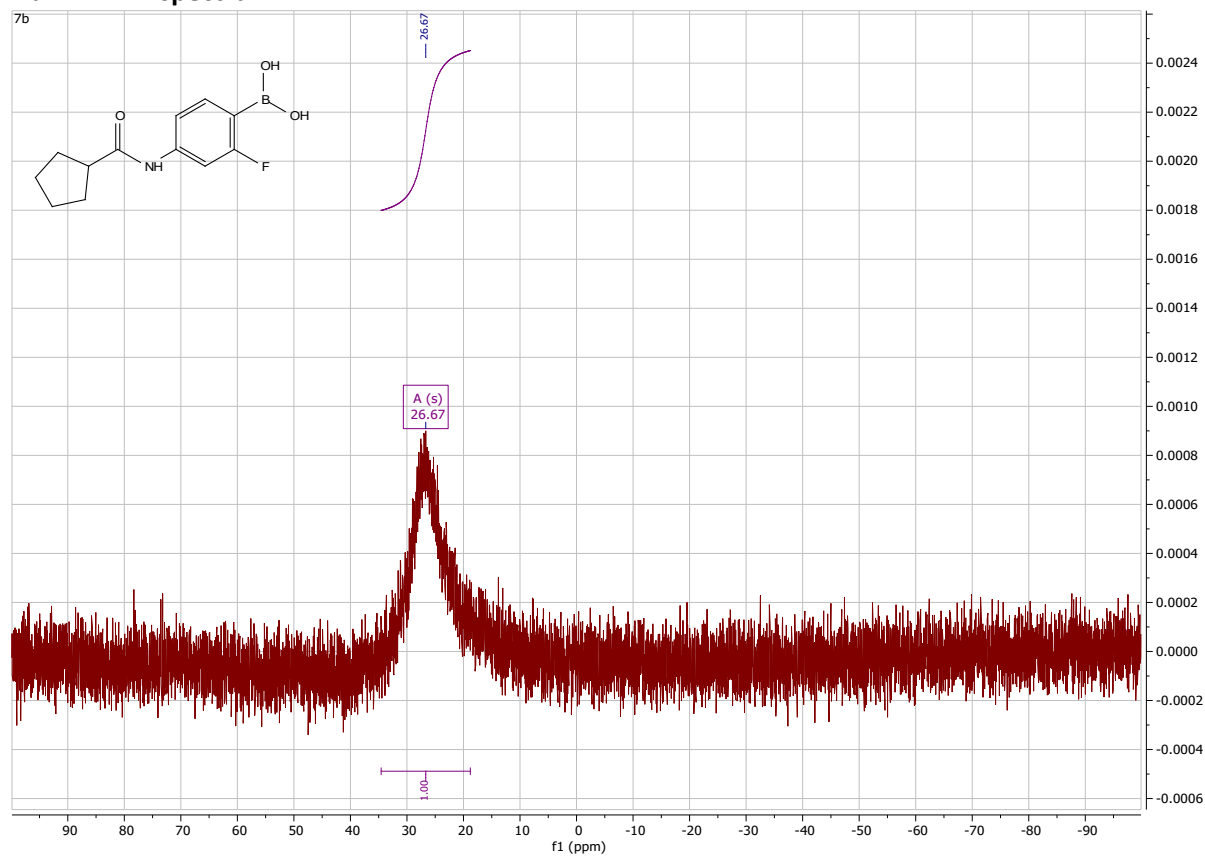

### 1c <sup>1</sup>H NMR spectrum

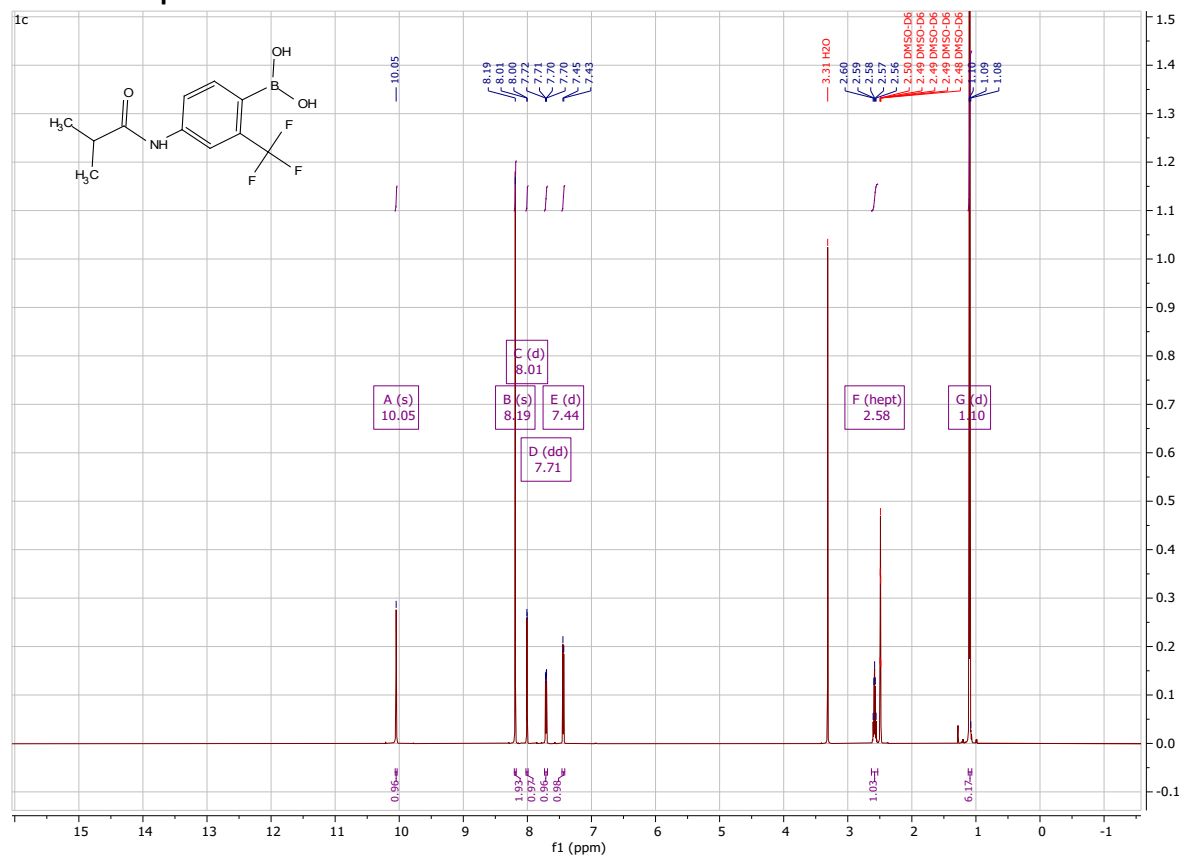

### 1c <sup>13</sup>C NMR spectrum

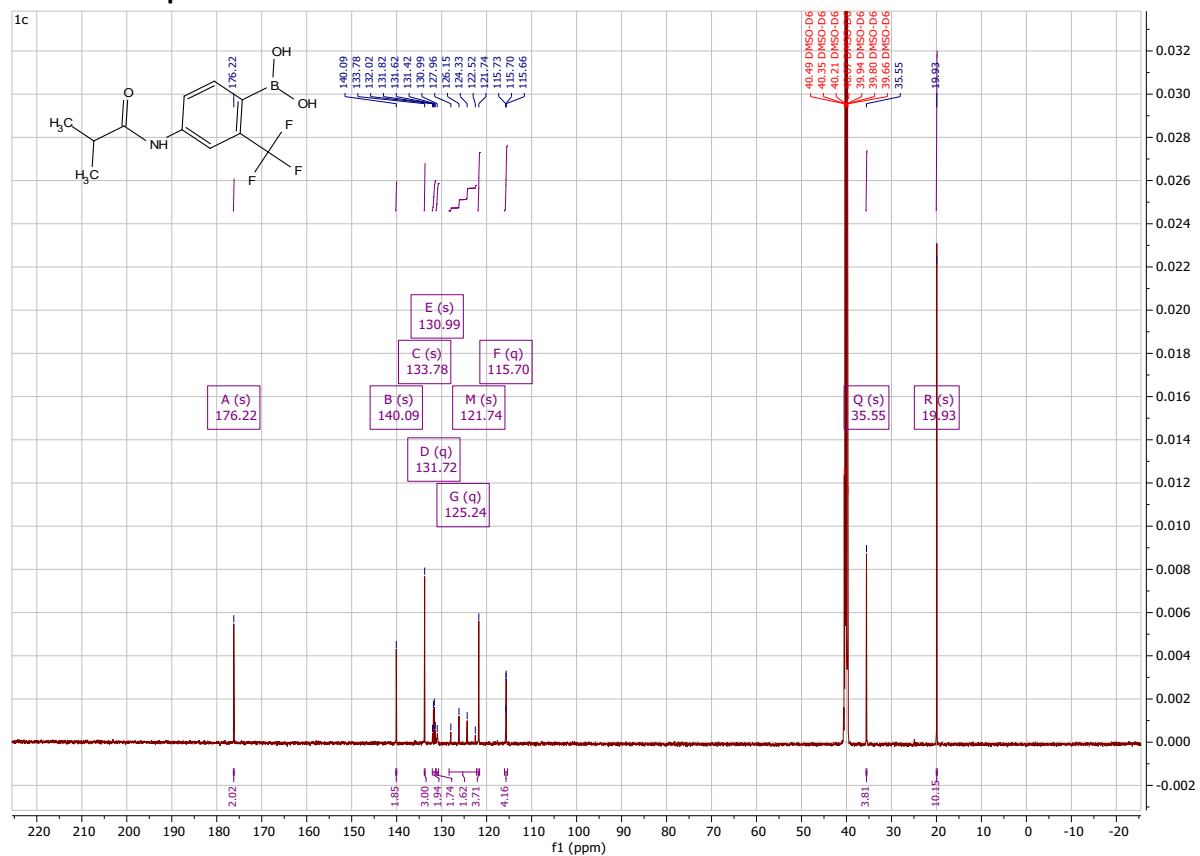

### 1c <sup>11</sup>B NMR spectrum

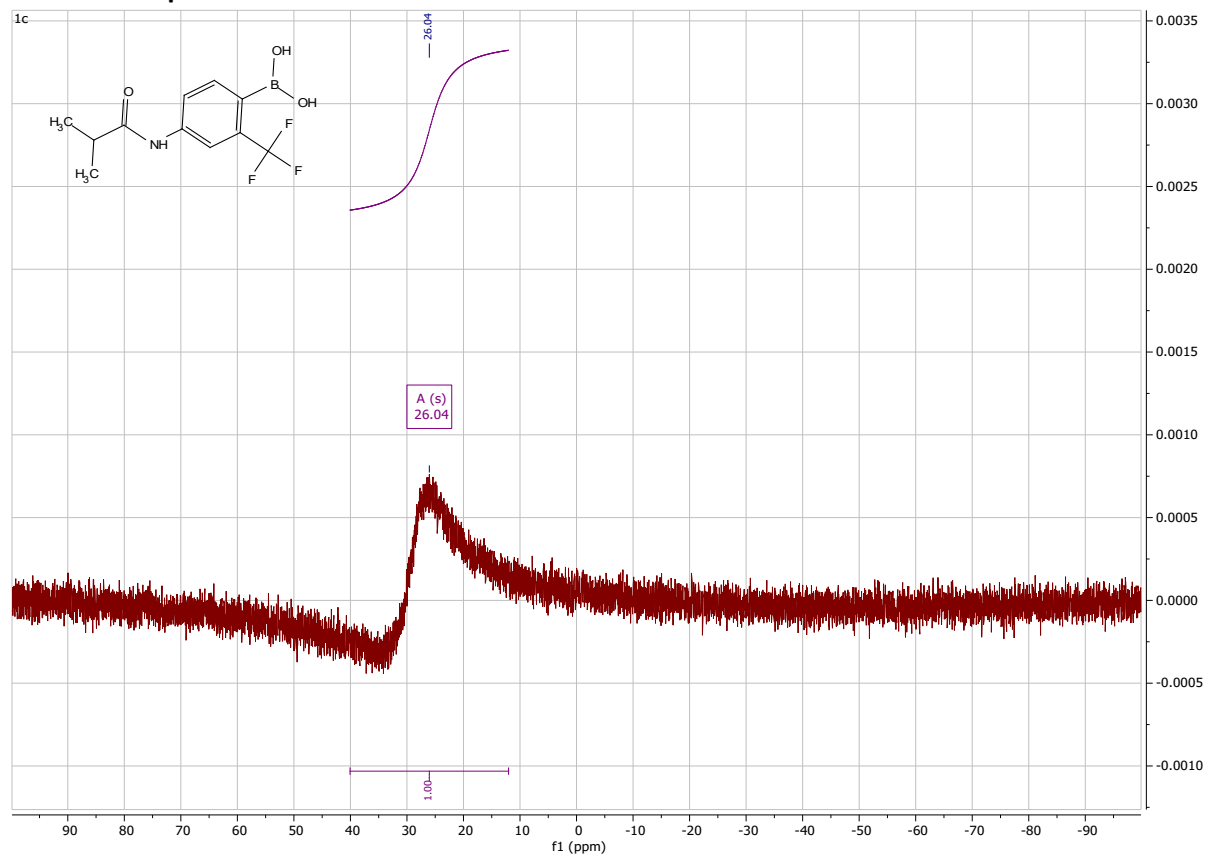



## 2c <sup>1</sup>H NMR spectrum

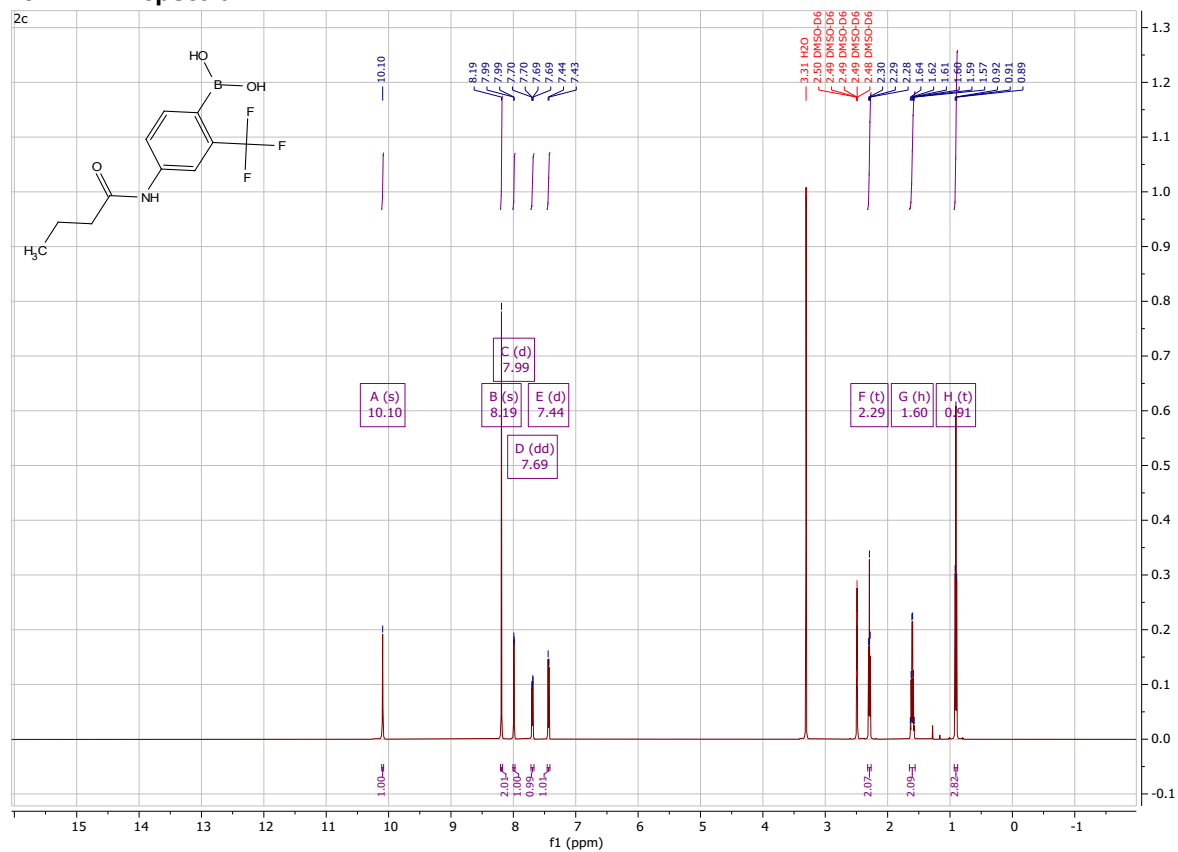

## 2c <sup>13</sup>C NMR spectrum

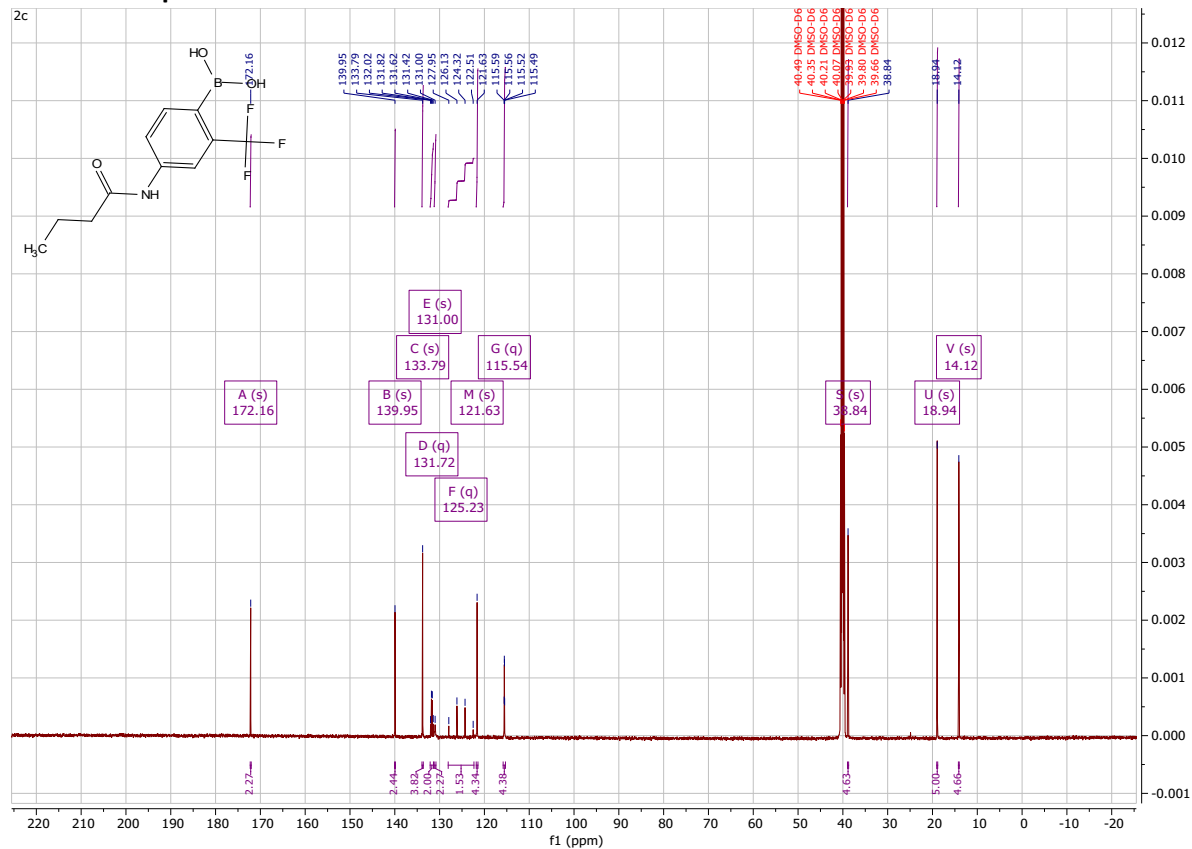

### 2c <sup>11</sup>B NMR spectrum

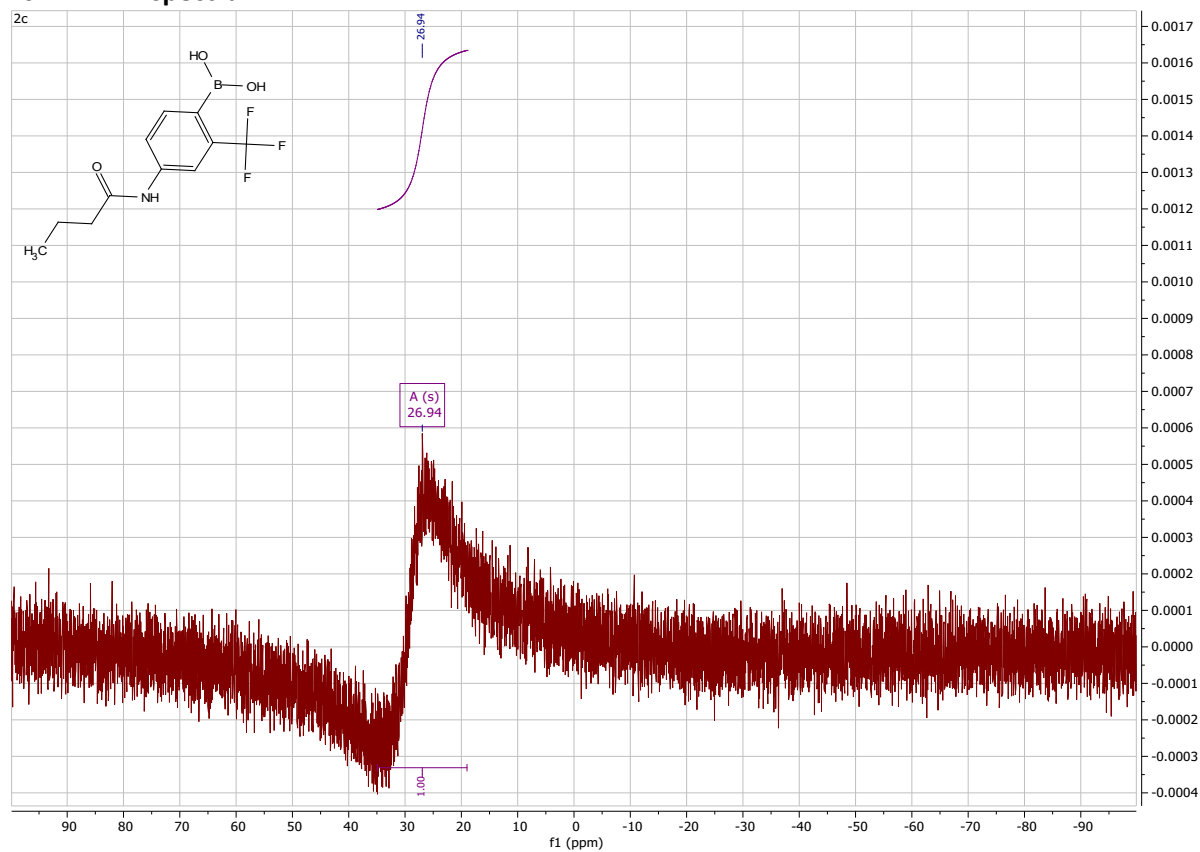

### 3c <sup>1</sup>H NMR spectrum

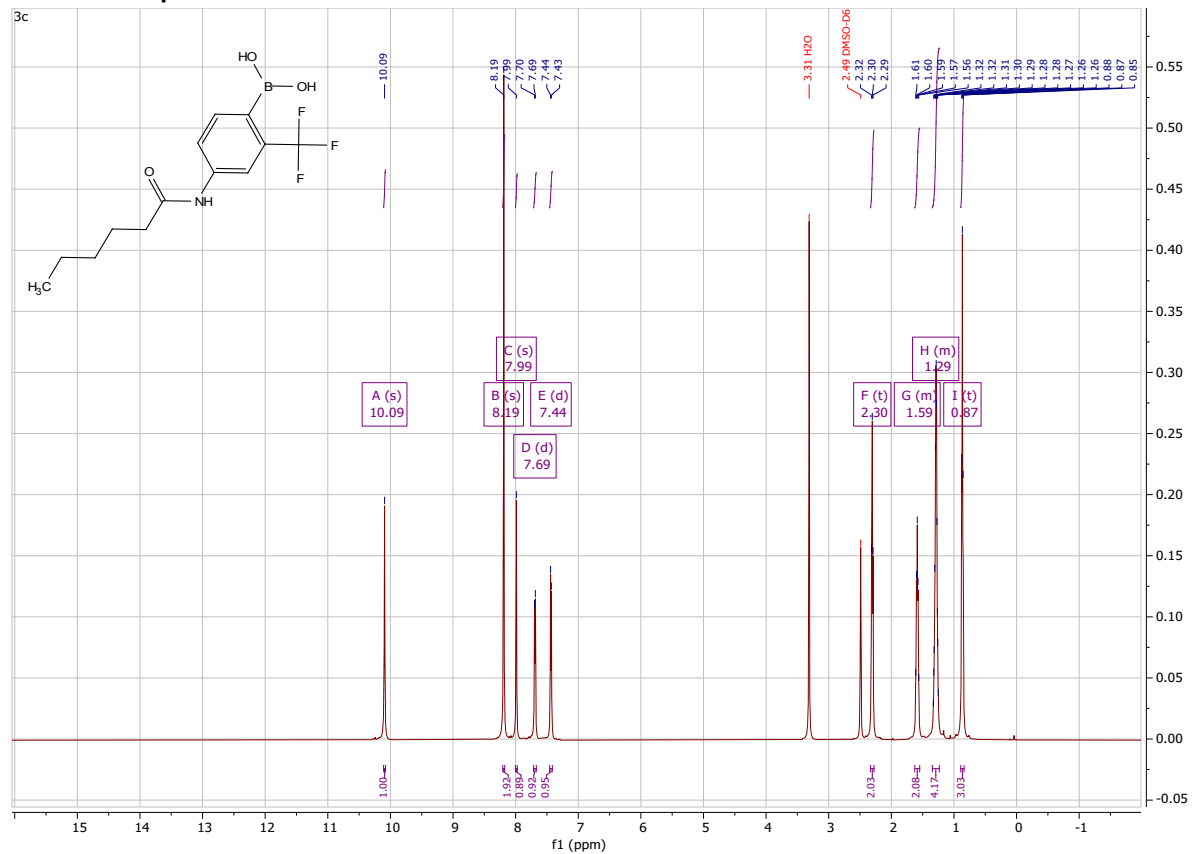

### 3c <sup>13</sup>C NMR spectrum

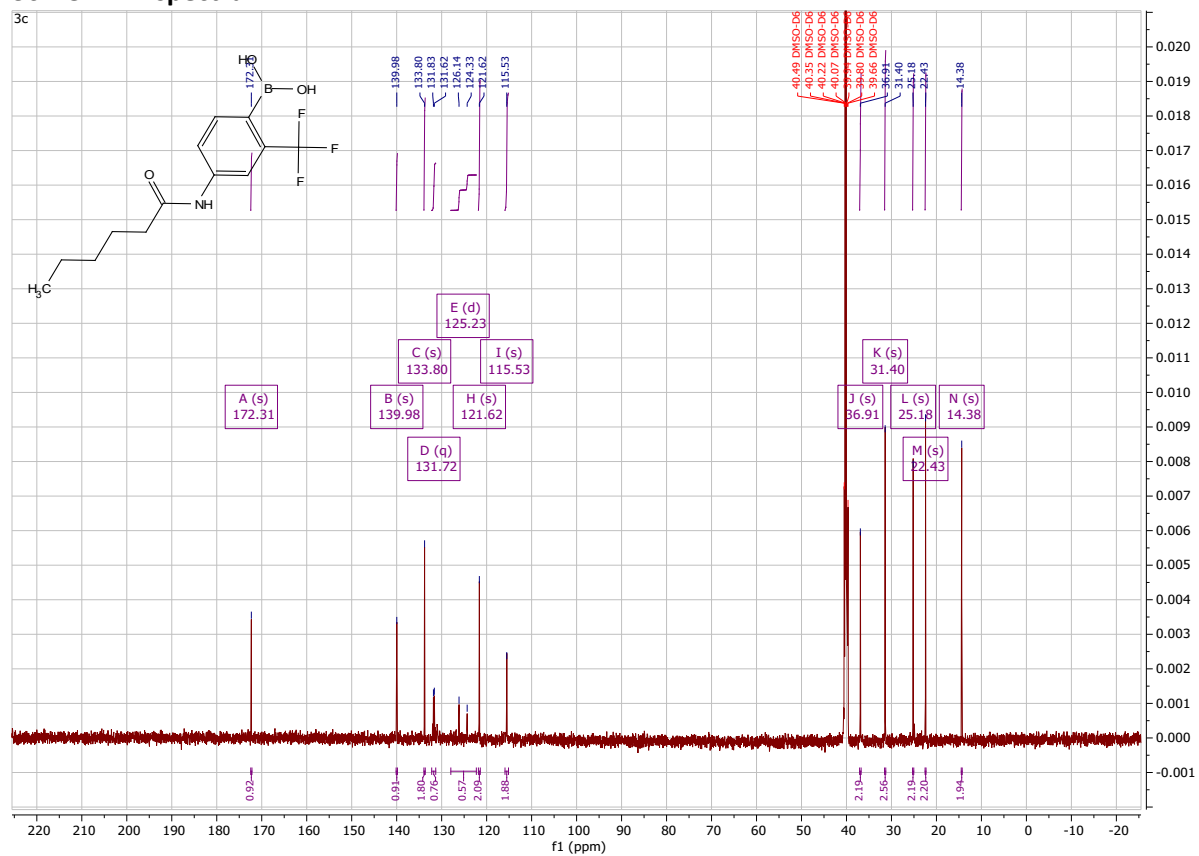

### 3c <sup>11</sup>B NMR spectrum

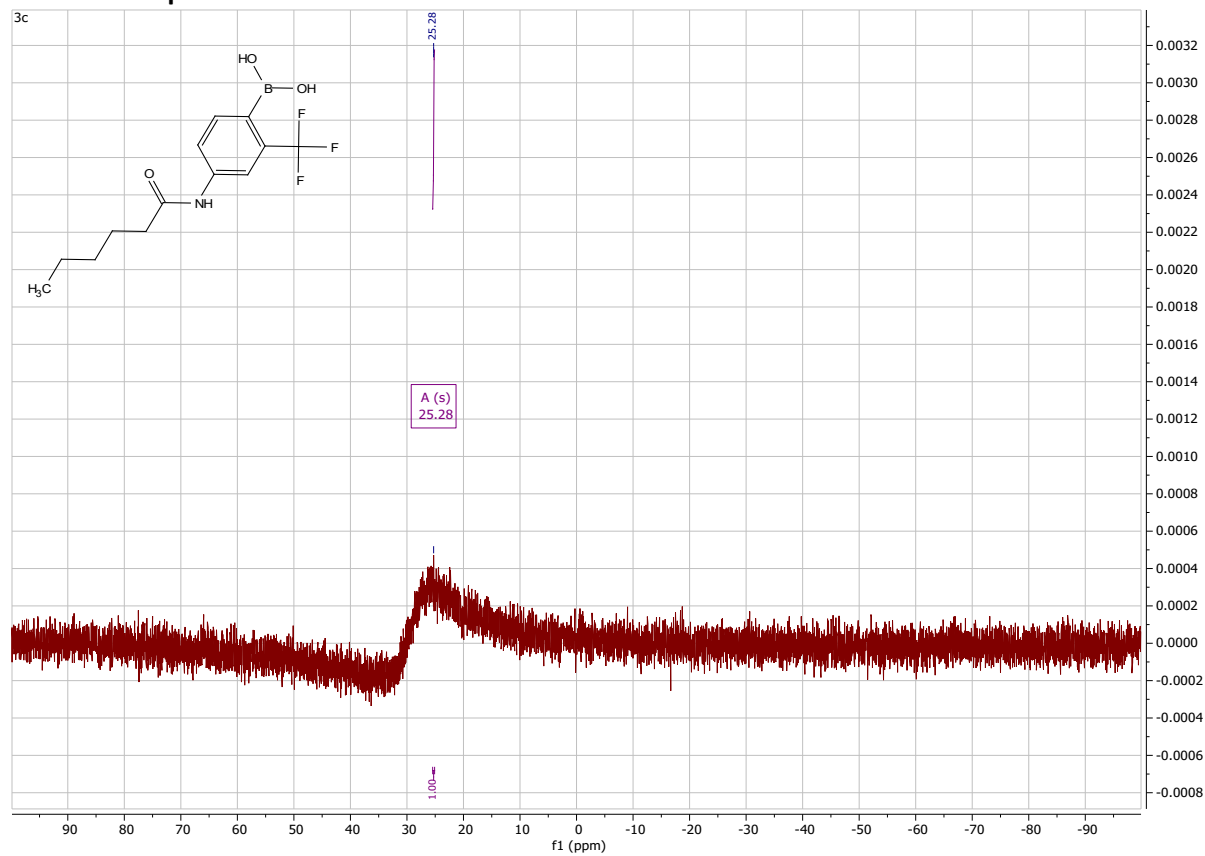

### 4c <sup>1</sup>H NMR spectrum

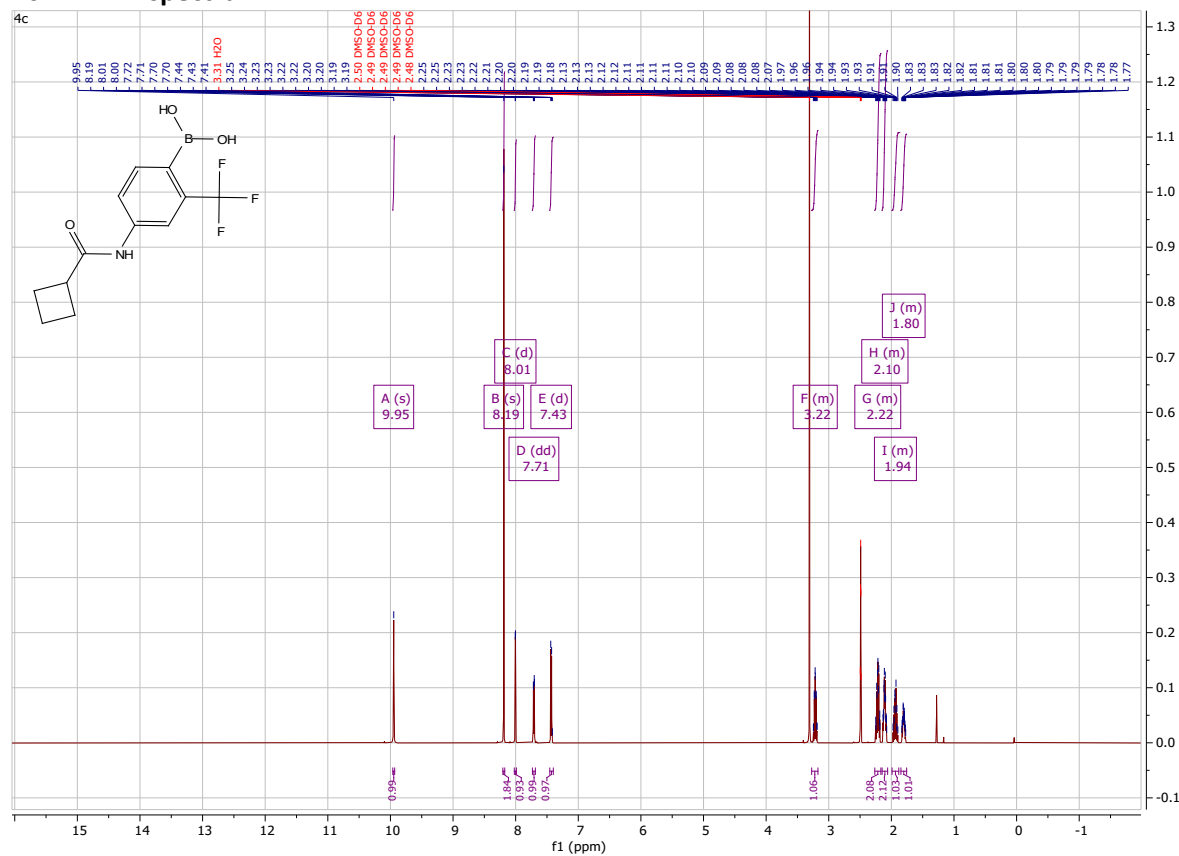

### 4c <sup>13</sup>C NMR spectrum

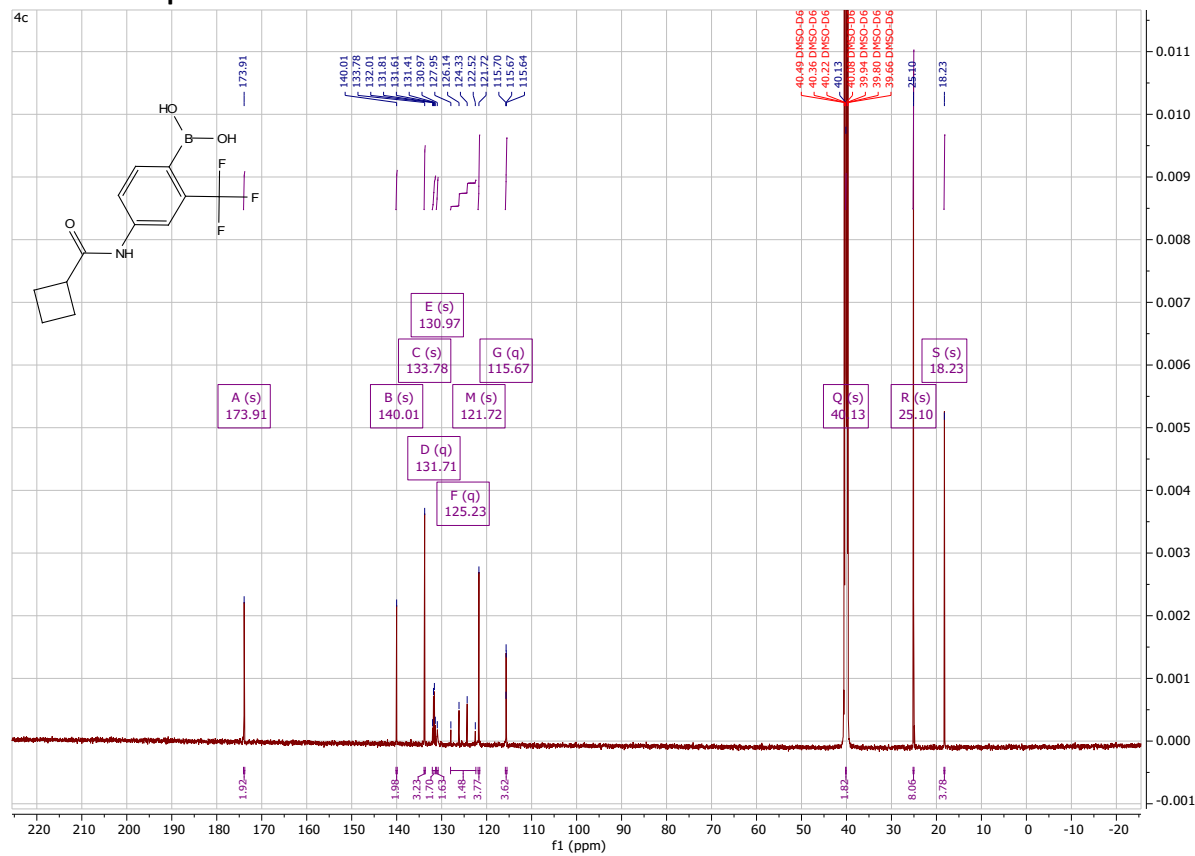

### 4c <sup>11</sup>B NMR spectrum

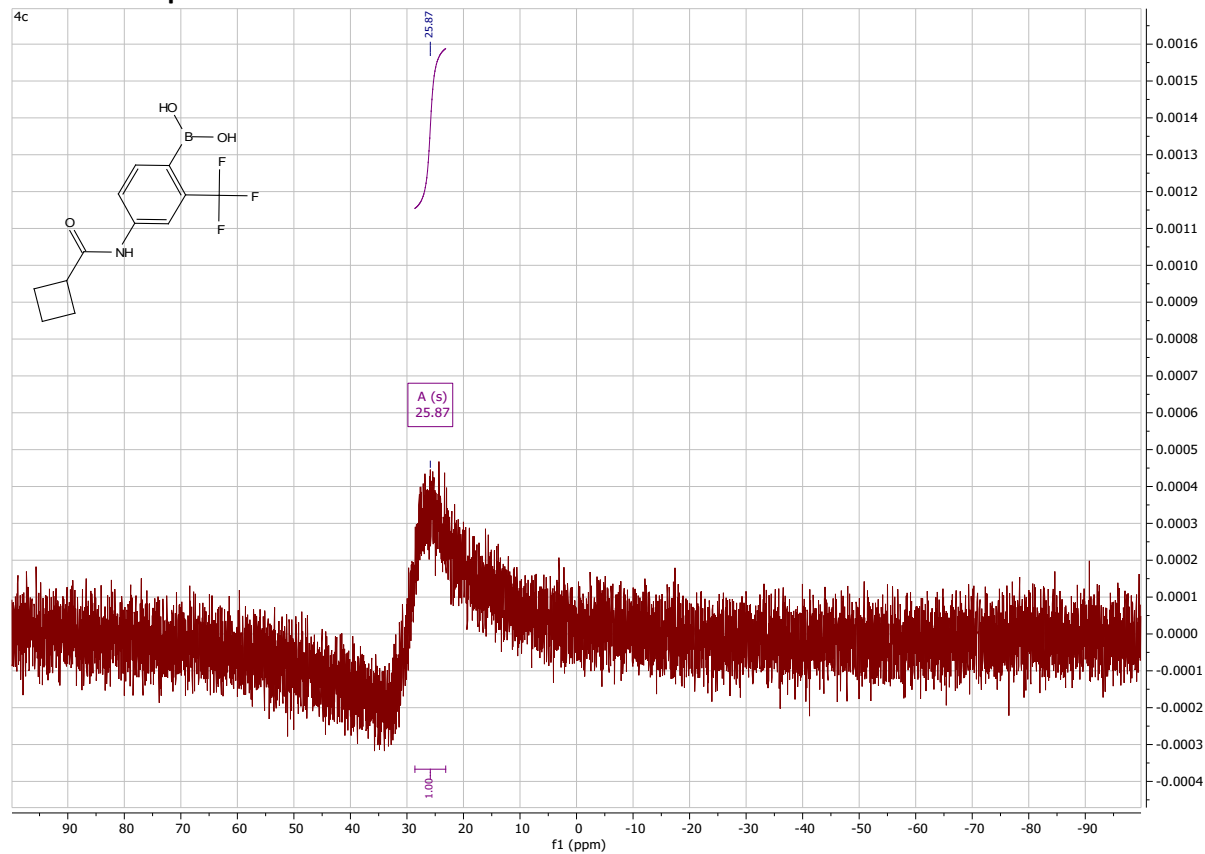

### 5c <sup>1</sup>H NMR spectrum

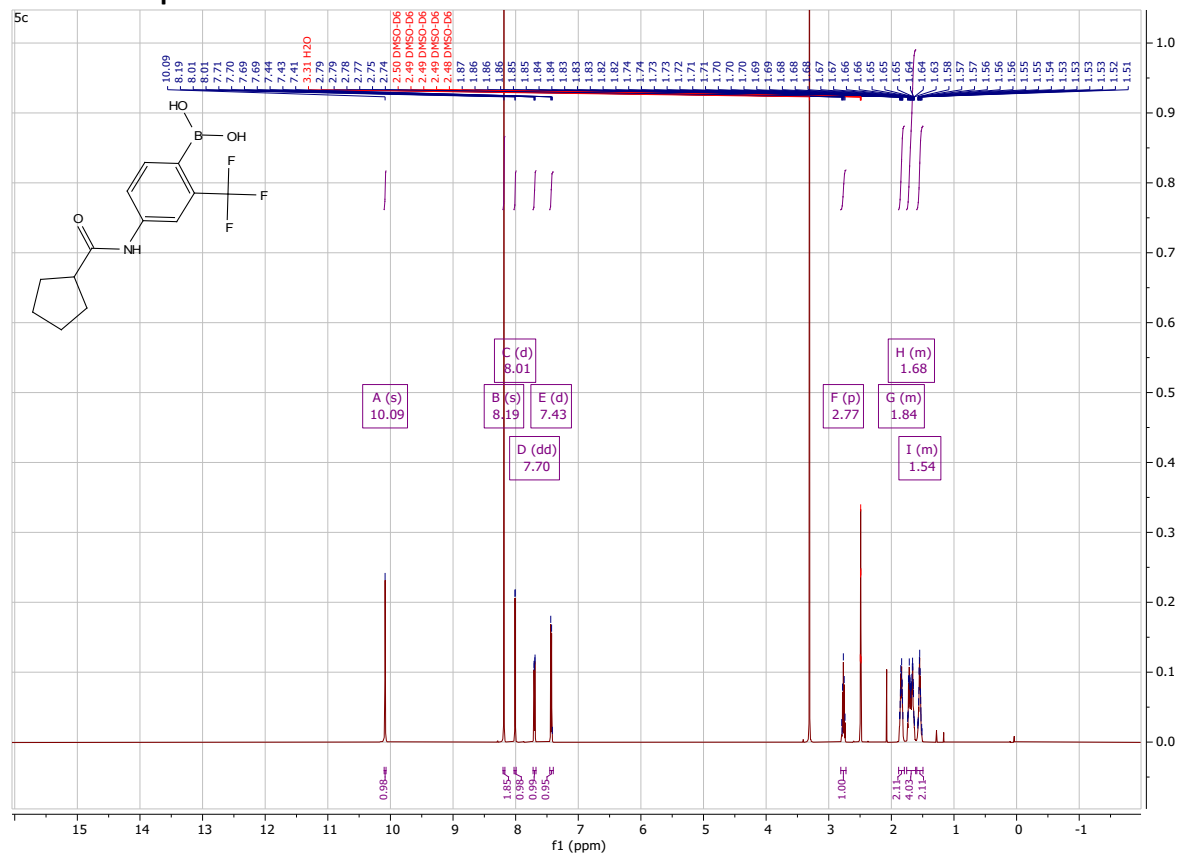

### 5c <sup>13</sup>C NMR spectrum

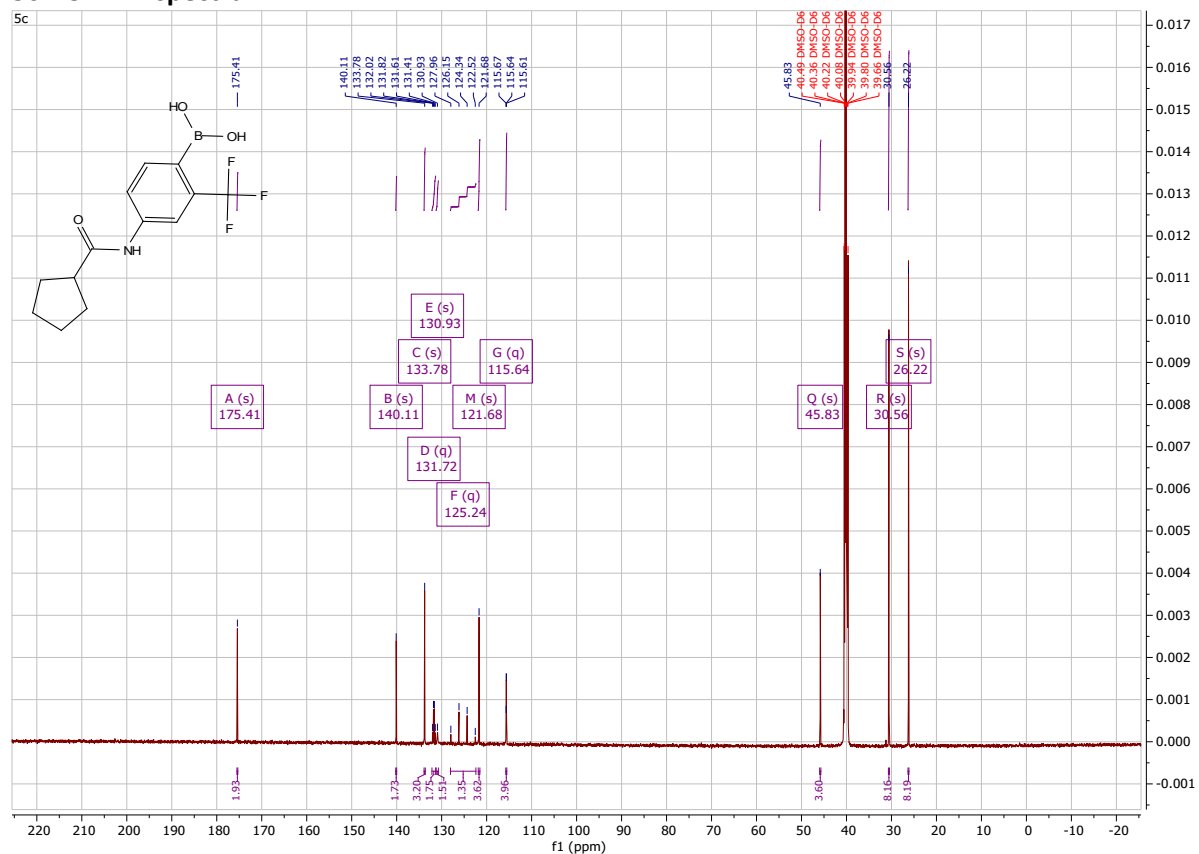

### 5c <sup>11</sup>B NMR spectrum

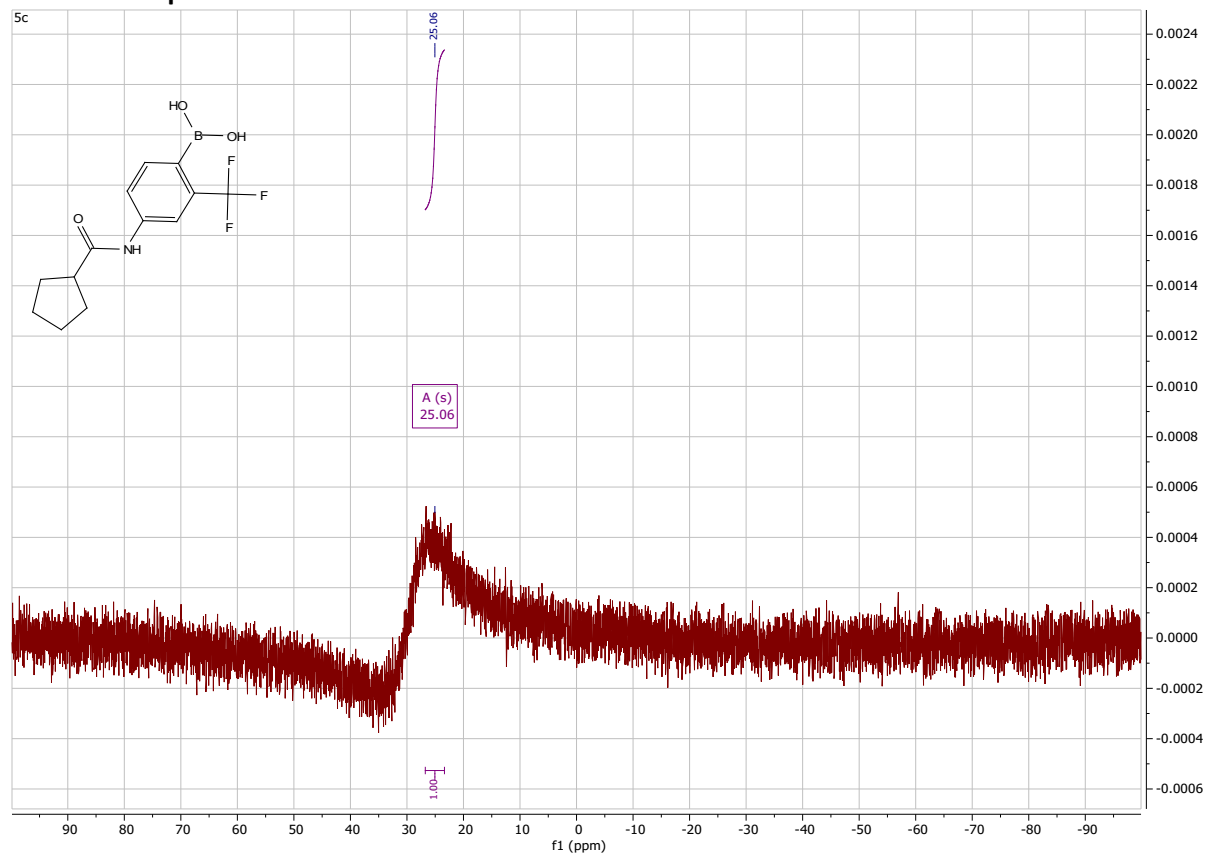

Supplement: d4md00343h2.pdf [file d4md00343h2.pdf]
